# Supplementary material
Source: bioRxiv or medRxiv preprint supplement (https://medrxiv.org/highwire/filestream/77852/field_highwire_adjunct_files/0/2020.04.16.20062141-1.pdf)
Supplement: Supplementary file [file 2020.04.16.20062141-1.pdf]

# The estimated impact of non-pharmaceutical interventions on documented cases of COVID-19: A cross-country analysis

Nicolas Banholzer<sup>a</sup>, Eva van Weenen<sup>a</sup>, Bernhard Kratzwald<sup>a</sup>, Arne Seeliger<sup>a</sup>, Daniel Tschernutter<sup>a</sup>, Pierluigi Bottrighi<sup>a</sup>, Alberto Cenedese<sup>a</sup>, Joan Puig Salles<sup>a</sup>, Werner Vach<sup>†,b,c</sup>, Stefan Feuerriegel<sup>†,a,\*</sup>

<sup>a</sup>*Department of Management, Technology, and Economics, ETH Zurich, 8092 Zurich, Switzerland*

<sup>b</sup>*Basel Academy, CH-4054 Basel, Switzerland*

<sup>c</sup>*Department of Environmental Sciences, University of Basel, CH-4055 Basel, Switzerland*

---

## Supplementary Material

### A. Descriptives

#### A.1. Timing of non-pharmaceutical interventions

In the main paper, we report the absolute cumulative number of cases until countries have implemented non-pharmaceutical interventions (NPIs). It is our impression that the timing of the response rather depends on the absolute number of cases, especially in the early phase of the epidemic. As a comparison, Fig. 1 shows the cumulative number of cases relative to a country's population<sup>3</sup> at the moment NPIs were implemented.

To summarize the temporal order of NPIs, Fig. 2 depicts the temporal rank at which NPIs were implemented across  $n = 20$  countries. Most countries implemented event bans first, followed by school closures, gatherings bans, border closures, and venue closures. In contrast, lockdowns and work bans have never been implemented first and many countries have not even implemented these NPIs.

---

\*Corresponding author. †These authors contributed equally.

*Email addresses: nbanholzer@ethz.ch (Nicolas Banholzer), sfeuerriegel@ethz.ch (Stefan Feuerriegel<sup>†</sup>)*

<sup>3</sup>The size of the population is obtained from the World Bank Database: <https://data.worldbank.org/indicator/SP.POP.1564.T0>.

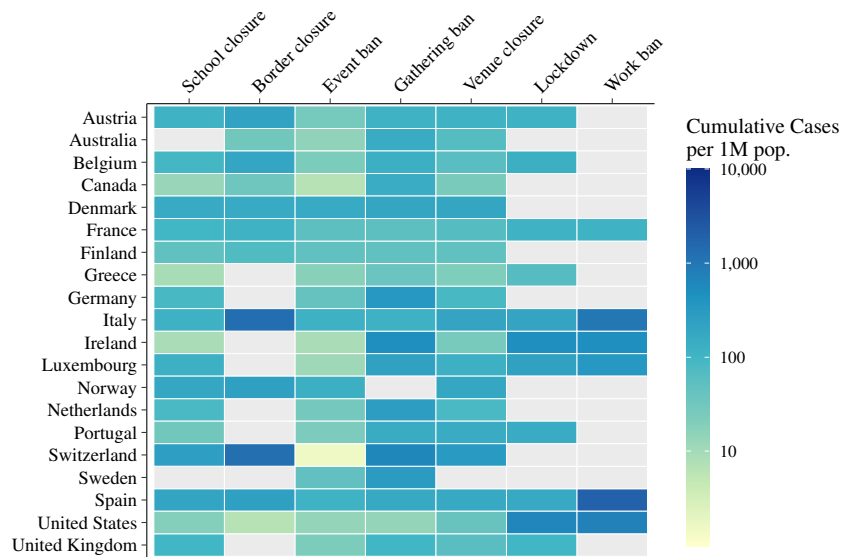

**Fig. 1** Heatmap showing the cumulative number of documented COVID-19 cases relative to the population size of each country until a non-pharmaceutical intervention (NPI) is implemented. By reporting the relative cumulative number of cases, the heatmap highlights the ordering of NPIs within countries. If an NPI is not implemented by a country, it is colored gray.

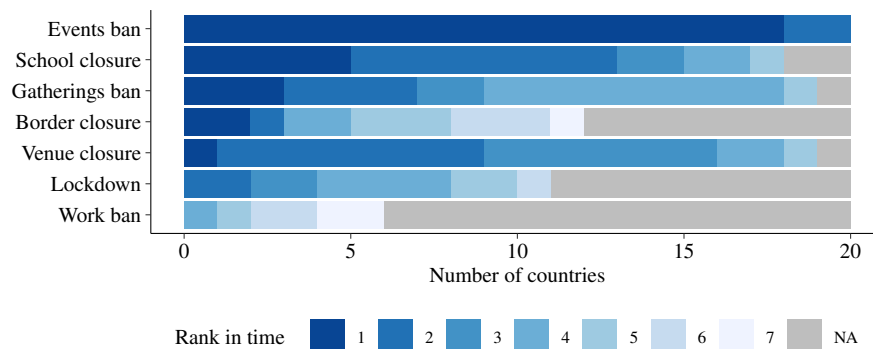

**Fig. 2** Temporal order of non-pharmaceutical interventions (NPIs) by rank of implementation. Shown is the number of  $n = 20$  countries for each time rank of the NPI. The ordering of NPIs is determined by the number of countries that have implemented the corresponding NPI first. Gray bars refer to the number of countries that have not implemented an NPI. In total, a rank can appear more than  $n = 20$  times if a country implemented two NPIs at the same time, so that the rank is shared by the two NPIs.

### A.2. Time delay between different non-pharmaceutical interventions

NPIs have been implemented at different times, where some countries have implemented more than one NPI at the same time. The latter raises concerns that it may not be possible to distinguish the individual effects of NPIs on documented COVID-19 case numbers. For that reason, we first looked at the average (Tbl. 1) and median (Tbl. 1) time delay between NPIs. Although there are NPIs that have been implemented close in time, on average, there is a certain time delay between the implementation of NPIs and, thus, it should be possible to distinguish their effects.

|                | School closure | Border closure | Event ban | Gathering ban | Venue closure | Lockdown | Work ban |
|----------------|----------------|----------------|-----------|---------------|---------------|----------|----------|
| School closure | —              | 6.2            | 3.5       | 3.6           | 2.3           | 5.2      | 11.8     |
| Border closure | 6.2            | —              | 8.5       | 5.1           | 5.1           | 4.4      | 5.7      |
| Event ban      | 3.5            | 8.5            | —         | 6.7           | 4.4           | 7.8      | 13.6     |
| Gathering ban  | 3.6            | 5.1            | 6.7       | —             | 3.2           | 1.9      | 8.2      |
| Venue closure  | 2.3            | 5.1            | 4.4       | 3.2           | —             | 3.5      | 9.2      |
| Lockdown       | 5.2            | 4.4            | 7.8       | 1.9           | 3.5           | —        | 5.4      |
| Work ban       | 11.8           | 5.7            | 13.6      | 8.2           | 9.2           | 5.4      | —        |

Table 1: Mean absolute time difference (in days) between the implementation of different NPIs across  $n = 20$  countries.

|                | School closure | Border closure | Event ban | Gathering ban | Venue closure | Lockdown | Work ban |
|----------------|----------------|----------------|-----------|---------------|---------------|----------|----------|
| School closure | —              | 3.5            | 2.0       | 2.0           | 2.0           | 3.0      | 16.0     |
| Border closure | 3.5            | —              | 5.5       | 3.0           | 3.0           | 2.0      | 4.0      |
| Event ban      | 2.0            | 5.5            | —         | 5.5           | 4.0           | 7.0      | 16.0     |
| Gathering ban  | 2.0            | 3.0            | 5.5       | —             | 2.0           | 0.0      | 4.0      |
| Venue closure  | 2.0            | 3.0            | 4.0       | 2.0           | —             | 2.5      | 11.0     |
| Lockdown       | 3.0            | 2.0            | 7.0       | 0.0           | 2.5           | —        | 1.0      |
| Work ban       | 16.0           | 4.0            | 16.0      | 4.0           | 11.0          | 1.0      | —        |

Table 2: Median absolute time difference (in days) between the implementation of different NPIs across  $n = 20$  countries.

### *A.3. Temporal development of the number of new cases by country*

Fig. 3 shows the temporal development of the documented number of new cases by country and indicates the respective timing of NPIs. Weekends are marked because, for many countries, fewer new cases are documented over the weekend.

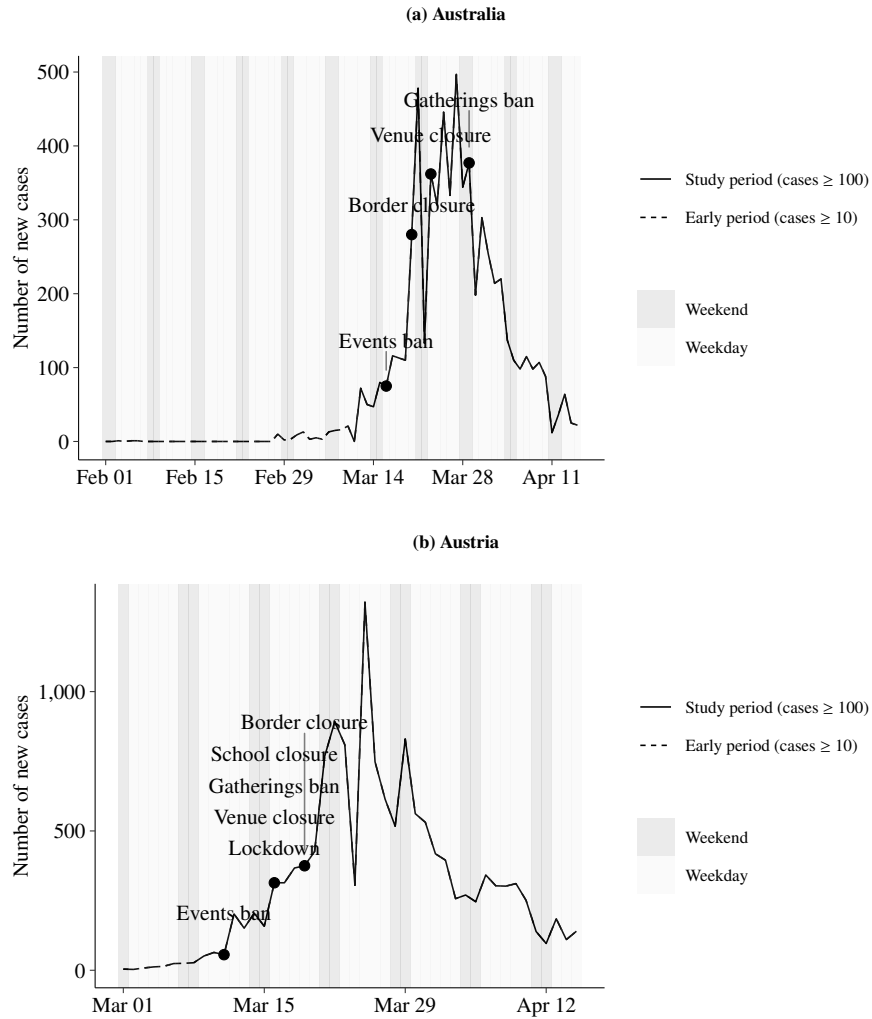

**Fig. 3** Temporal development of the observed (documented) number of new cases by country ( $n = 20$ ). The points at which non-pharmaceutical interventions (NPIs) have been implemented are annotated. The solid line refers to the study period, starting from a cumulative case count of 100. To show the timing of NPIs potentially implemented before that period, the dashed line refers to the early period, starting from a cumulative case count of 10.

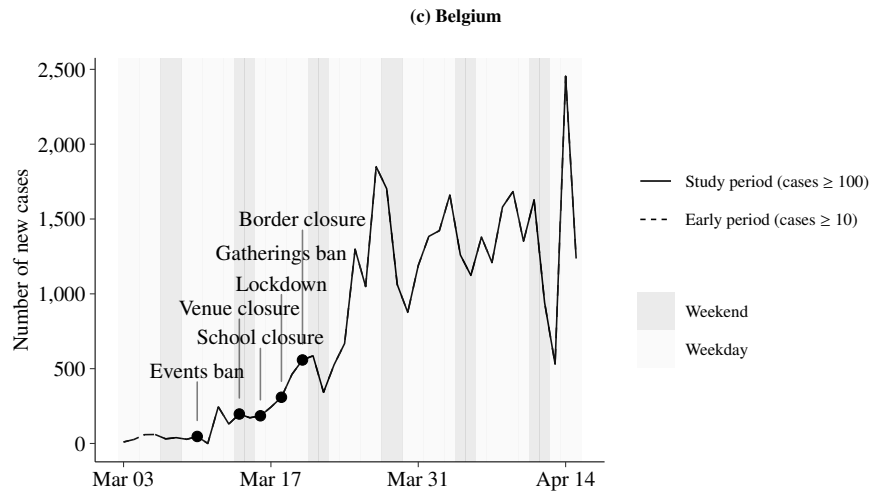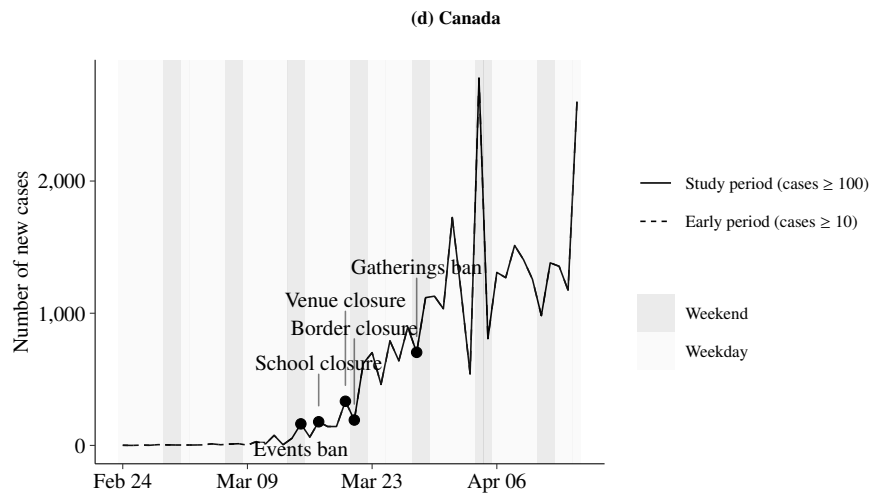

**Fig. 3** Temporal development of the observed (documented) number of new cases by country ( $n = 20$ ). The points at which non-pharmaceutical interventions (NPIs) have been implemented are annotated. The solid line refers to the study period, starting from a cumulative case count of 100. To show the timing of NPIs potentially implemented before that period, the dashed line refers to the early period, starting from a cumulative case count of 10.

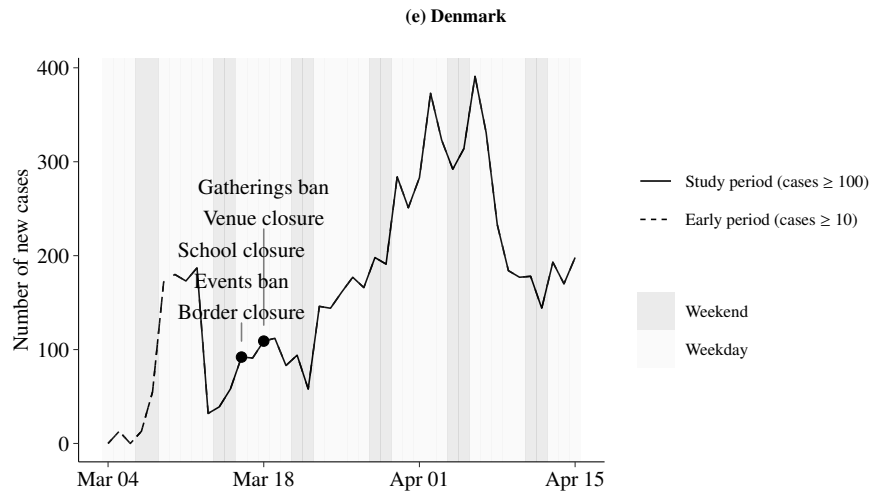

**Fig. 3** Temporal development of the observed (documented) number of new cases by country ( $n = 20$ ). The points at which non-pharmaceutical interventions (NPIs) have been implemented are annotated. The solid line refers to the study period, starting from a cumulative case count of 100. To show the timing of NPIs potentially implemented before that period, the dashed line refers to the early period, starting from a cumulative case count of 10.

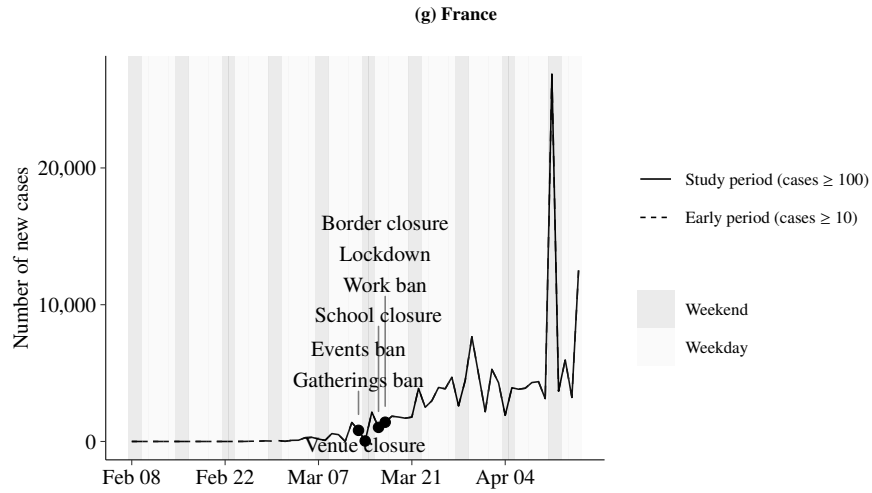

**Fig. 3** Temporal development of the observed (documented) number of new cases by country ( $n = 20$ ). The points at which non-pharmaceutical interventions (NPIs) have been implemented are annotated. The solid line refers to the study period, starting from a cumulative case count of 100. To show the timing of NPIs potentially implemented before that period, the dashed line refers to the early period, starting from a cumulative case count of 10.



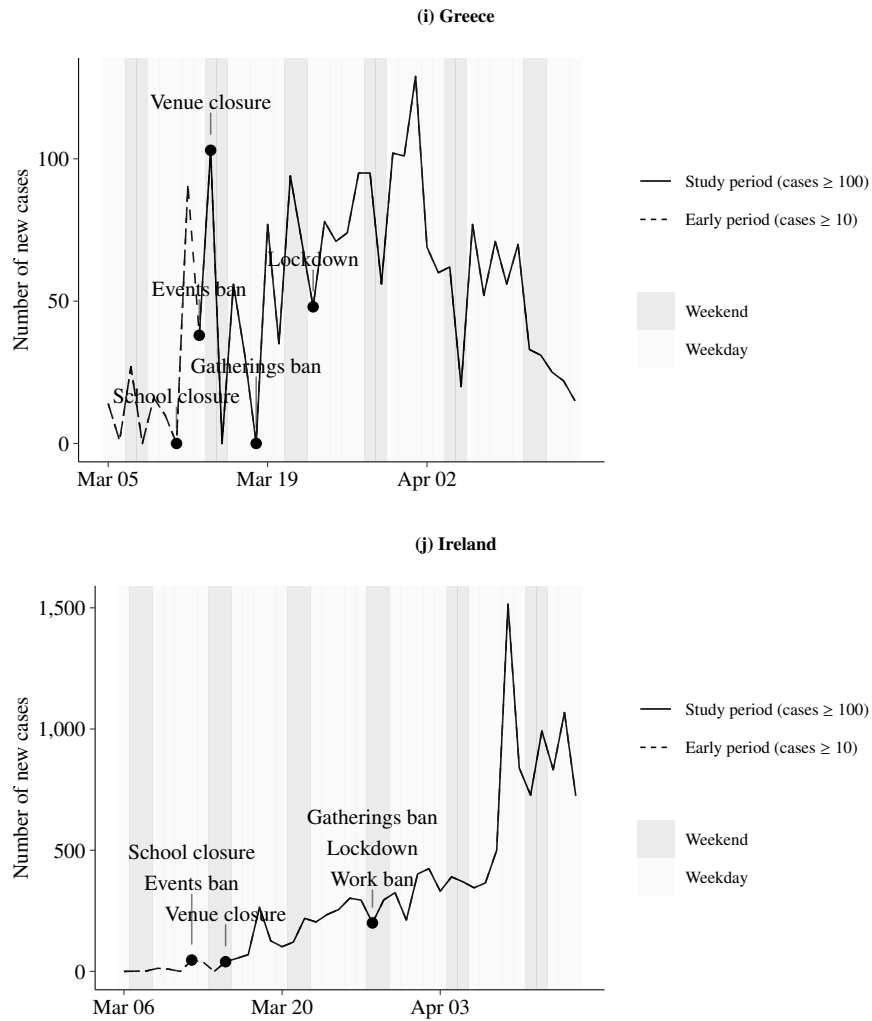

**Fig. 3** Temporal development of the observed (documented) number of new cases by country ( $n = 20$ ). The points at which non-pharmaceutical interventions (NPIs) have been implemented are annotated. The solid line refers to the study period, starting from a cumulative case count of 100. To show the timing of NPIs potentially implemented before that period, the dashed line refers to the early period, starting from a cumulative case count of 10.

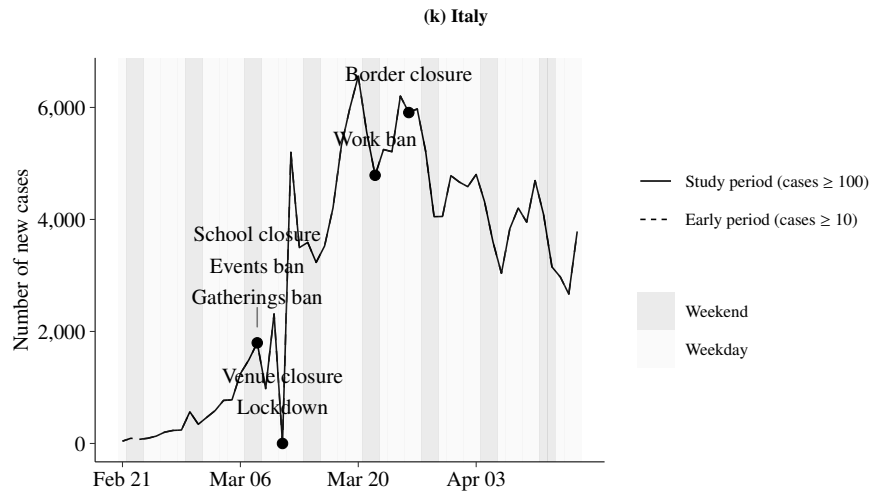

**Fig. 3** Temporal development of the observed (documented) number of new cases by country ( $n = 20$ ). The points at which non-pharmaceutical interventions (NPIs) have been implemented are annotated. The solid line refers to the study period, starting from a cumulative case count of 100. To show the timing of NPIs potentially implemented before that period, the dashed line refers to the early period, starting from a cumulative case count of 10.

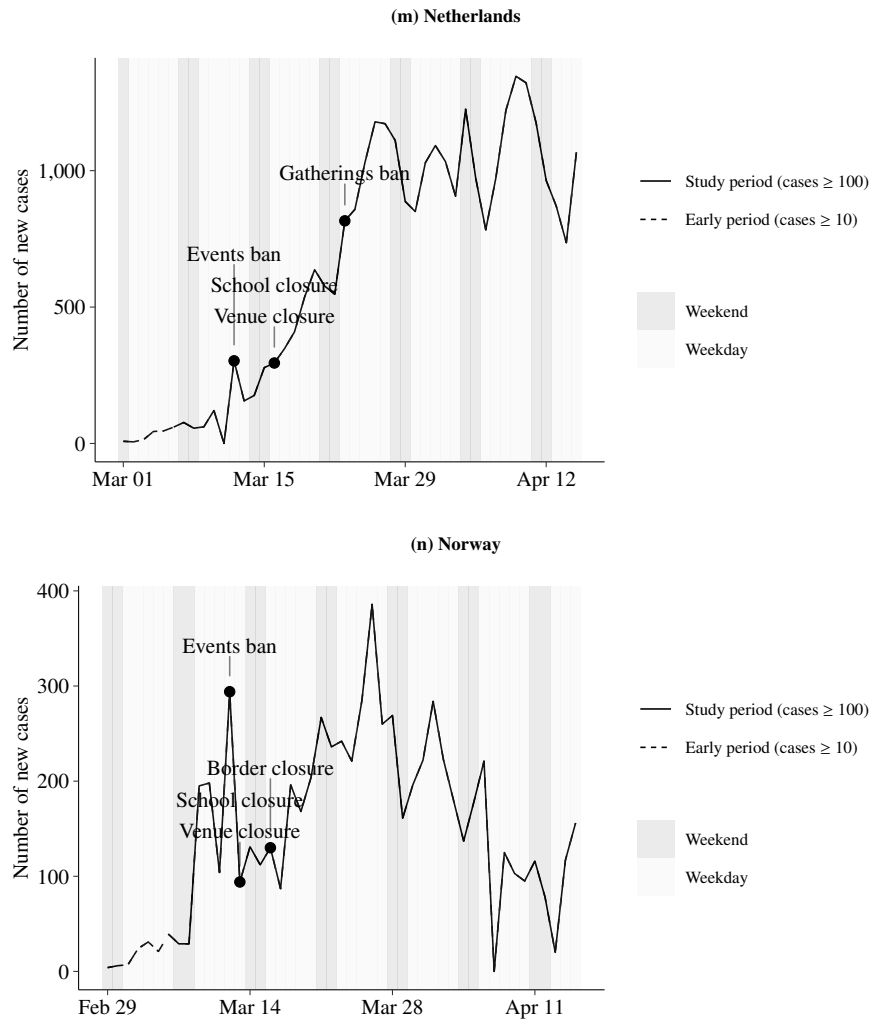

**Fig. 3** Temporal development of the observed (documented) number of new cases by country ( $n = 20$ ). The points at which non-pharmaceutical interventions (NPIs) have been implemented are annotated. The solid line refers to the study period, starting from a cumulative case count of 100. To show the timing of NPIs potentially implemented before that period, the dashed line refers to the early period, starting from a cumulative case count of 10.

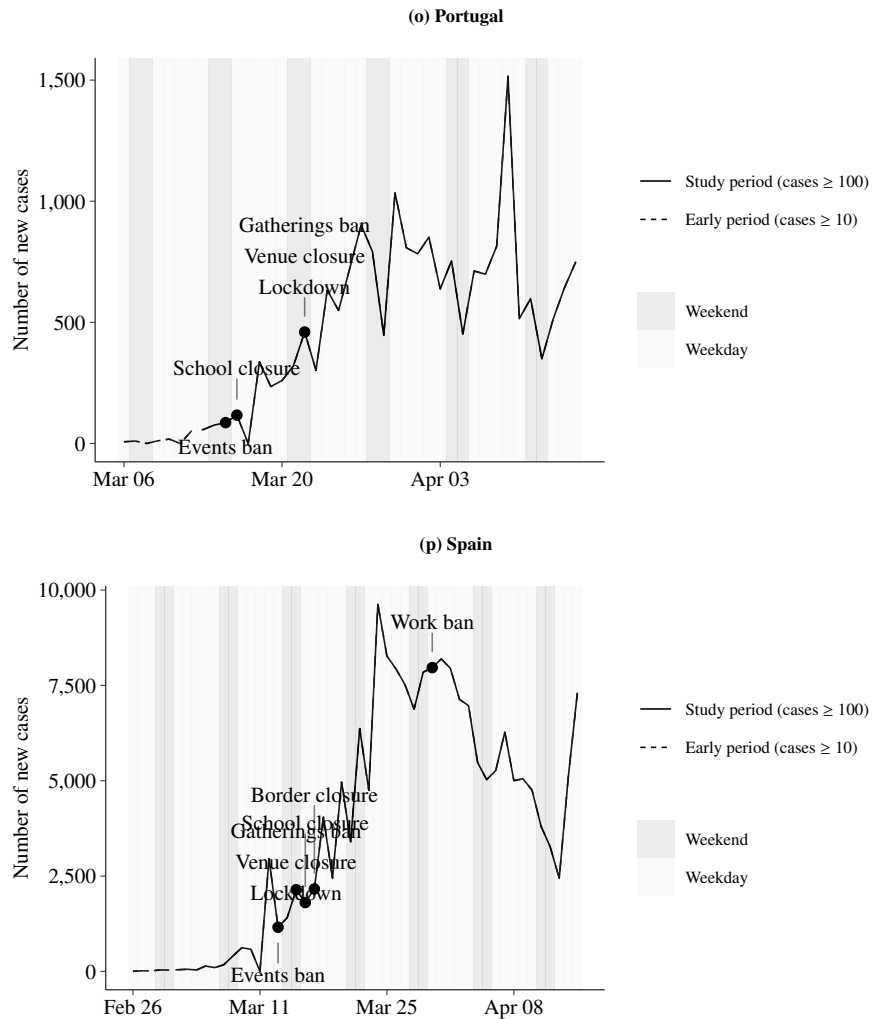

**Fig. 3** Temporal development of the observed (documented) number of new cases by country ( $n = 20$ ). The points at which non-pharmaceutical interventions (NPIs) have been implemented are annotated. The solid line refers to the study period, starting from a cumulative case count of 100. To show the timing of NPIs potentially implemented before that period, the dashed line refers to the early period, starting from a cumulative case count of 10.

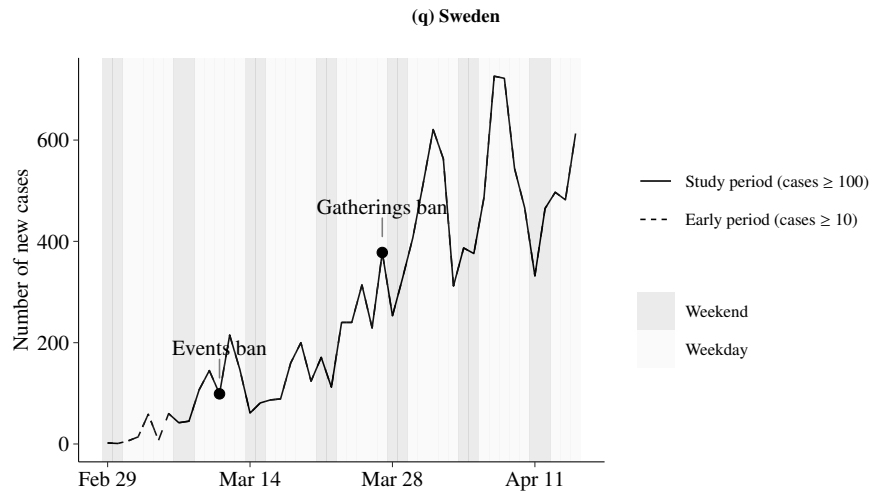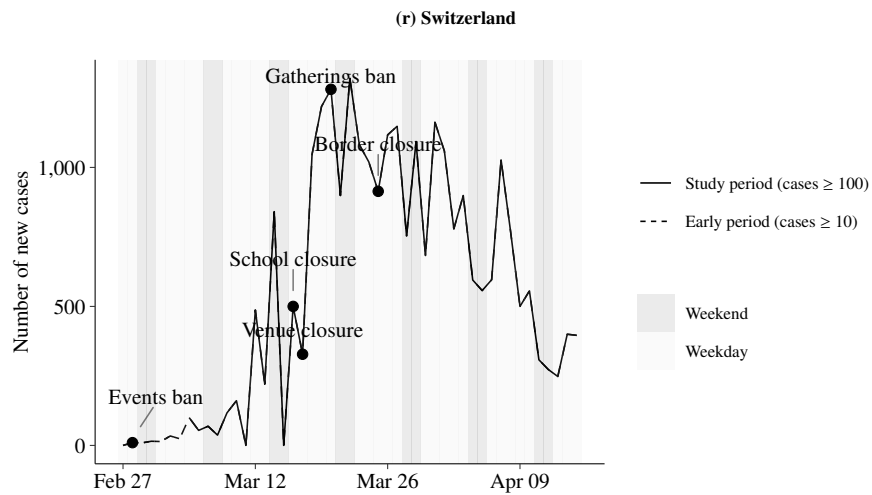

**Fig. 3** Temporal development of the observed (documented) number of new cases by country ( $n = 20$ ). The points at which non-pharmaceutical interventions (NPIs) have been implemented are annotated. The solid line refers to the study period, starting from a cumulative case count of 100. To show the timing of NPIs potentially implemented before that period, the dashed line refers to the early period, starting from a cumulative case count of 10.

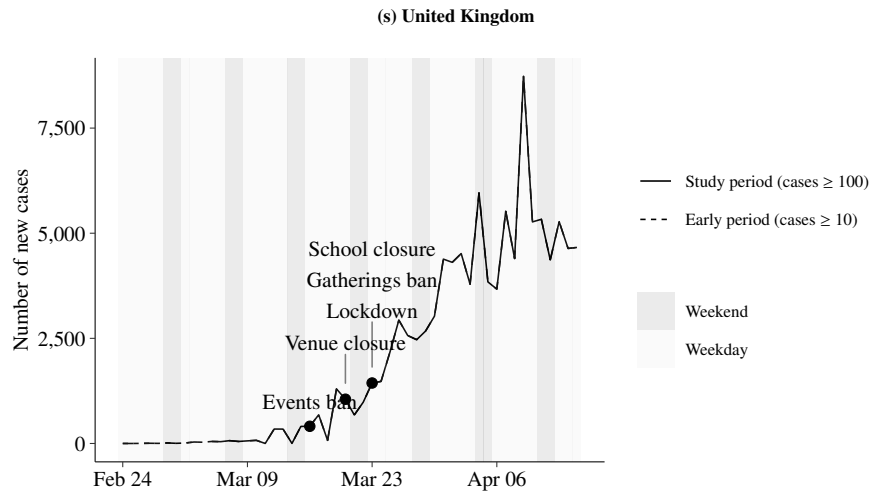

**Fig. 3** Temporal development of the observed (documented) number of new cases by country ( $n = 20$ ). The points at which non-pharmaceutical interventions (NPIs) have been implemented are annotated. The solid line refers to the study period, starting from a cumulative case count of 100. To show the timing of NPIs potentially implemented before that period, the dashed line refers to the early period, starting from a cumulative case count of 10.

## B. Parameter estimation

The model parameters are estimated with a Bayesian approach. Specifically, Markov chain Monte Carlo (MCMC) sampling is used as implemented by the Hamiltonian Monte Carlo algorithm with the No-U-Turn Sampler (NUTS) from Stan 2.19.2<sup>1</sup>. If not stated otherwise, we report posterior means and credible intervals based on the 2.5% and 97.5% quantile of the posterior samples.

Each model is estimated with 4 Markov chains and 2,000 iterations of which the first 1,000 iterations are discarded as part of the warm-up. Estimation power is evaluated via the ratio of the effective sample size ( $\hat{n}_{eff}/N$ ), and convergence of the Markov chains is assessed with the Gelman-Rubin convergence ( $\hat{R}$ ). Further checks pertain to the detection of influential observations and correlations between the parameters of interest.

During estimation, a combination of informative and weakly informative priors is used, except for the effect of NPIs which are restricted to be non-positive based on the assumption that NPIs cannot increase the number of new cases. Prior choices are mostly informed by prior choice recommendations from the Stan Development Team<sup>2</sup>.

| Effect            | Parameter       | Prior                                                                              |
|-------------------|-----------------|------------------------------------------------------------------------------------|
| Fixed intercept   | $\alpha$        | Student-t ( $\nu = 7, \mu = 0, \sigma = 10$ )                                      |
| Varying intercept | $\alpha_r$      | Normal( $0, \sigma_\alpha$ )                                                       |
|                   | $\sigma_\alpha$ | Student-t <sup>+</sup> ( $\nu = 4, \mu = 0, \sigma = 1$ )                          |
| Weekday           | $\gamma_w$      | Student-t ( $\nu = 7, \mu = 0, \sigma = 2.5$ )                                     |
| NPIs              | $\theta_m$      | Student-t <sup>-</sup> ( $\nu = 7, \mu = 0, \sigma = 2.5$ )                        |
| Overdispersion    | $\phi$          | $\phi = (\frac{1}{\xi})^2$ , where $\xi \sim \text{Normal}^+(\mu = 0, \sigma = 1)$ |

Table 3: Prior choices for model parameters.

## C. Estimation results

### C.1. Estimated model parameters

Tbl. 4 presents posterior means and credible intervals for all model parameters. See the main paper for a discussion of the effects of NPIs. Here we discuss some of the additional model parameters.

The ratio of the effective sample size ( $\hat{n}_{eff}/N$ ) and the Gelman-Rubin convergence diagnostic ( $\hat{R}$ ) indicates good estimation power. It further suggests that the Markov chains converged.

There is a country-specific variation in the intercept parameter ( $\alpha_r$ ), reflecting differences in the rate of new cases – i.e., spread of the disease – in the absence of any NPI. Sweden is among the countries with lowest estimated rate and the US and France among the countries with highest estimated rate. This coincides well with the different observed severity of the epidemic in these countries.

The estimated weekday effects are relative to Monday. More cases are documented during the week, especially on Thursday. There is a strong weekend effect as indicated by the negative sign of the estimate for Saturday and Sunday.

The overdispersion parameter ( $\phi$ ) can be rather precisely estimated to be in the magnitude of 2, i.e. we are far away from the case of no overdispersion ( $\phi = \infty$ ). This coincides with the empirical observation of rather unsmooth trajectories in each country (Section A.3).



|                 |                | Mean  | Lower CrI | Upper CrI | $\hat{n}_{eff}/N$ | $\hat{R}$ |
|-----------------|----------------|-------|-----------|-----------|-------------------|-----------|
| $\alpha$        | Intercept      | -1.32 | -1.53     | -1.09     | 0.19              | 1.00      |
| $\alpha_1$      | Australia      | -0.46 | -0.74     | -0.19     | 0.38              | 1.00      |
| $\alpha_2$      | Austria        | -0.03 | -0.28     | 0.23      | 0.37              | 1.00      |
| $\alpha_3$      | Belgium        | 0.28  | 0.03      | 0.53      | 0.31              | 1.00      |
| $\alpha_4$      | Canada         | 0.25  | -0.01     | 0.52      | 0.40              | 1.00      |
| $\alpha_5$      | Denmark        | -0.09 | -0.35     | 0.18      | 0.36              | 1.00      |
| $\alpha_6$      | Finland        | -0.01 | -0.27     | 0.26      | 0.40              | 1.00      |
| $\alpha_7$      | France         | 0.52  | 0.26      | 0.80      | 0.34              | 1.00      |
| $\alpha_8$      | Germany        | -0.14 | -0.39     | 0.10      | 0.35              | 1.00      |
| $\alpha_9$      | Greece         | -0.42 | -0.70     | -0.15     | 0.44              | 1.00      |
| $\alpha_{10}$   | Ireland        | 0.27  | -0.01     | 0.56      | 0.41              | 1.00      |
| $\alpha_{11}$   | Italy          | -0.02 | -0.26     | 0.23      | 0.34              | 1.00      |
| $\alpha_{12}$   | Luxembourg     | 0.07  | -0.23     | 0.37      | 0.45              | 1.00      |
| $\alpha_{13}$   | Netherlands    | -0.14 | -0.39     | 0.11      | 0.35              | 1.00      |
| $\alpha_{14}$   | Norway         | -0.38 | -0.66     | -0.11     | 0.38              | 1.00      |
| $\alpha_{15}$   | Portugal       | 0.02  | -0.25     | 0.29      | 0.37              | 1.00      |
| $\alpha_{16}$   | Spain          | 0.30  | 0.05      | 0.55      | 0.32              | 1.00      |
| $\alpha_{17}$   | Sweden         | -0.49 | -0.75     | -0.22     | 0.36              | 1.00      |
| $\alpha_{18}$   | Switzerland    | -0.12 | -0.37     | 0.15      | 0.41              | 1.00      |
| $\alpha_{19}$   | United Kingdom | 0.06  | -0.19     | 0.30      | 0.36              | 1.00      |
| $\alpha_{20}$   | United States  | 0.53  | 0.28      | 0.80      | 0.31              | 1.00      |
| $\sigma_\alpha$ | Country SD     | 0.34  | 0.23      | 0.49      | 0.55              | 1.00      |
| $\gamma_1$      | Tuesday        | -0.01 | -0.19     | 0.17      | 0.36              | 1.00      |
| $\gamma_2$      | Wednesday      | 0.01  | -0.17     | 0.20      | 0.34              | 1.00      |
| $\gamma_3$      | Thursday       | 0.30  | 0.12      | 0.49      | 0.43              | 1.00      |
| $\gamma_4$      | Friday         | 0.09  | -0.10     | 0.27      | 0.37              | 1.00      |
| $\gamma_5$      | Saturday       | -0.03 | -0.21     | 0.15      | 0.38              | 1.00      |
| $\gamma_6$      | Sunday         | -0.16 | -0.35     | 0.02      | 0.35              | 1.00      |
| $\theta_1$      | School closure | -0.09 | -0.26     | 0.00      | 0.83              | 1.00      |
| $\theta_2$      | Border closure | -0.38 | -0.54     | -0.21     | 0.53              | 1.00      |
| $\theta_3$      | Event ban      | -0.26 | -0.43     | -0.09     | 0.82              | 1.00      |
| $\theta_4$      | Gathering ban  | -0.42 | -0.60     | -0.23     | 0.65              | 1.00      |
| $\theta_5$      | Venue closure  | -0.44 | -0.66     | -0.22     | 0.61              | 1.00      |
| $\theta_6$      | Lockdown       | -0.05 | -0.16     | 0.00      | 0.91              | 1.00      |
| $\theta_7$      | Work ban       | -0.38 | -0.58     | -0.17     | 0.74              | 1.00      |
| $\phi$          | Overdispersion | 2.09  | 1.88      | 2.29      | 1.18              | 1.00      |

Table 4: Estimation results for the main analysis. The ratio  $\hat{n}_{eff}/N$  is the effective sample size ( $\hat{n}_{eff}$ ) divided by the total sample size ( $N$ ). Generally, ratios above 0.5 correspond to high, between 0.1 and 0.5 to medium and below 0.1 to low estimation power<sup>3</sup>.  $\hat{R}$  is the Gelman-Rubin convergence diagnostic<sup>4</sup>. Generally, good convergence is indicated by  $\hat{R}$  being close to 1.00, while bad convergence is indicated by values above 1.10<sup>5</sup>.

### C.2. Checking for correlations between parameters

A similar timing could make it difficult to distinguish the individual effects of NPIs. To investigate this issue, Fig. 4 depicts the pairwise bivariate posterior distributions of the parameters of the NPIs. We observe a tendency towards negative correlations, reflecting the difficulty to distinguish the effects of two NPIs if they are often introduced close in time. In particular, it seems to be somewhat difficult to distinguish between the effects of gathering bans and venue closures ( $r = -0.40$ ), which were often implemented close in time (see Tbl. 1-2). In contrast, there seems to be no problem in distinguishing the effects of venue closures and work bans ( $r = -0.02$ ), which were on average relatively far away.

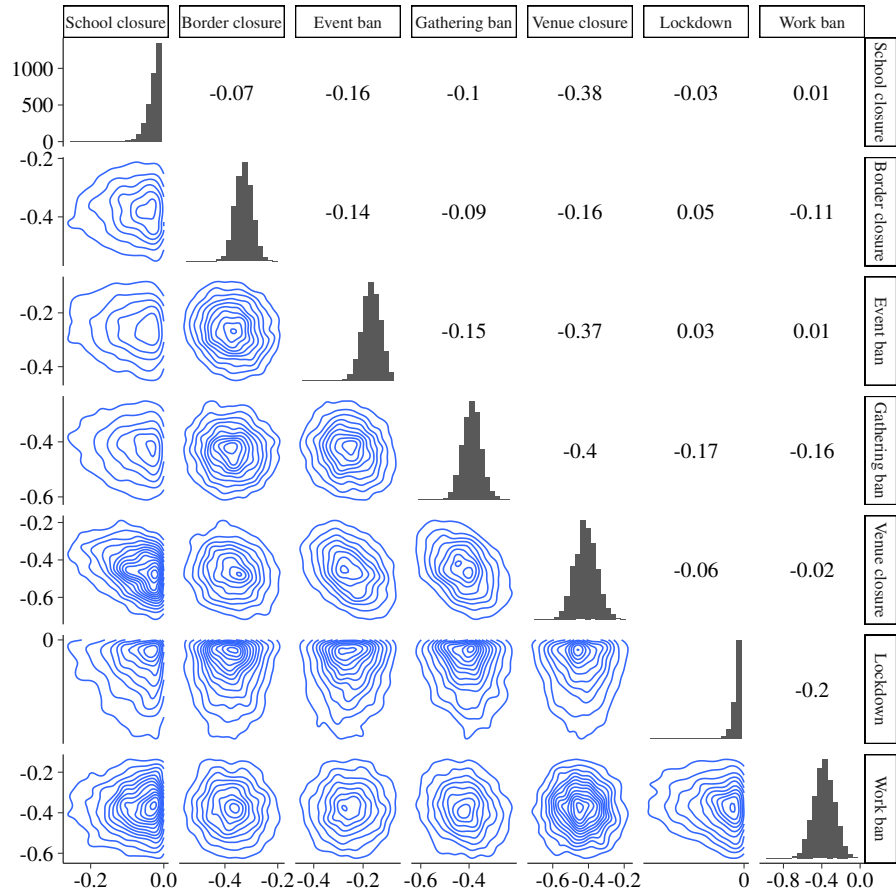

**Fig. 4** Bivariate posterior distributions visualized by contour plots (lower diagonal matrix) from the MCMC sample for the parameters of non-pharmaceutical interventions (NPIs). Pearson's  $r$  is shown in the upper diagonal matrix, and the marginal distribution is depicted as a histogram on the diagonal of the matrix.

### *C.3. Checking for influential observations*

Influential observations can affect parameter estimates. To check for influential observations, Fig. 5 shows the tail shape parameter  $k$  from approximate leave-one-out (LOO) cross-validation using Pareto smoothed importance sampling<sup>6</sup>. None of our observations seem to be highly influential.

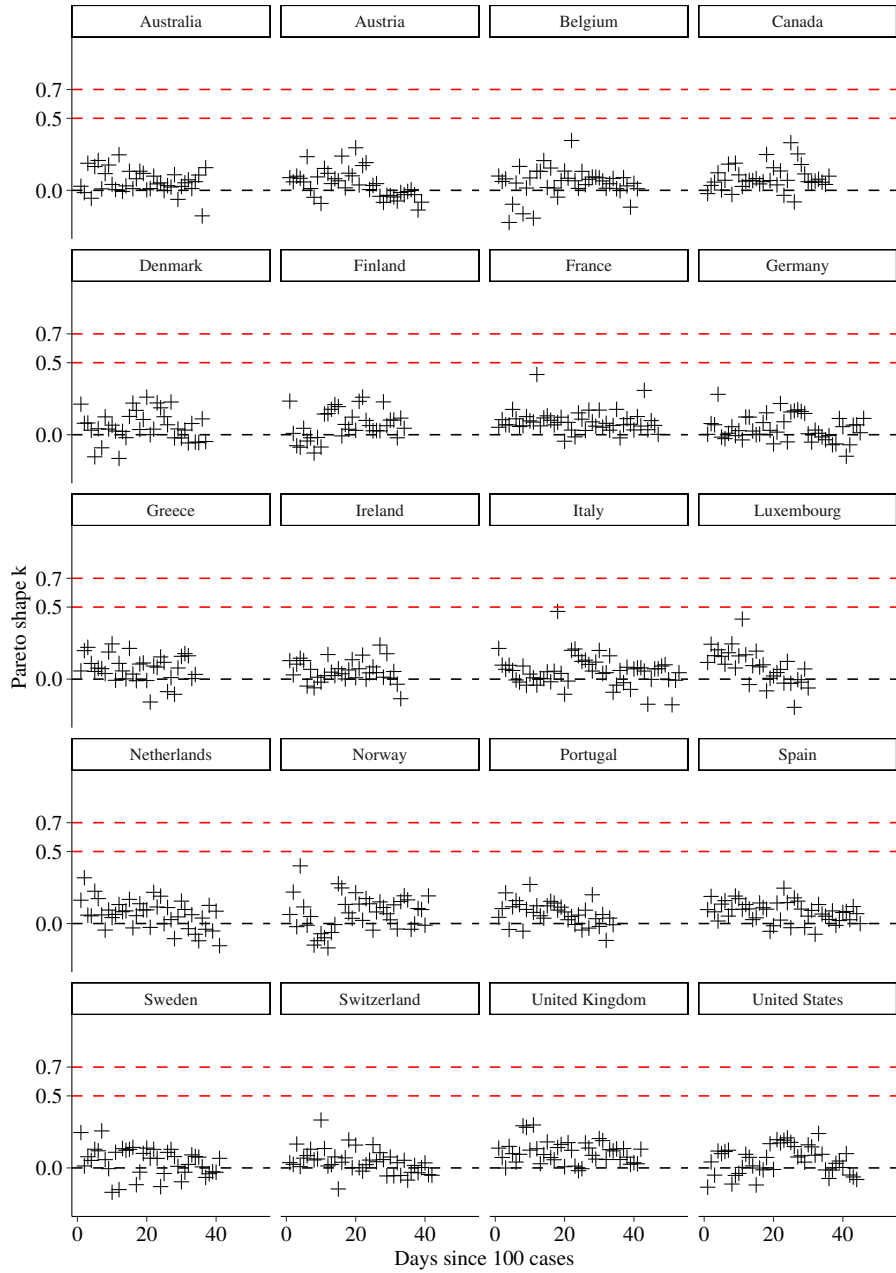

**Fig. 5** Model diagnostics based on influential observations. Shown is the tail shape parameter  $k$  of the generalized Pareto distribution from approximate leave-one-out (LOO) cross-validation using Pareto smoothed importance sampling for each observation by country and time. Values below 0.5 indicate that the observation is not influential; values between 0.5 and 0.7 indicate that the observation might be influential but the model is usually still robust; values above 0.7 indicate the observation is influential and that the model may not be robust<sup>6</sup>.

## D. Sensitivity analysis

The sensitivity of our results is analyzed as follows. (1) The preprocessing is changed such that we start our analysis from a cumulative case number of 10 (Section D.1). (2) The time delay with which NPIs can affect the rate of new cases is varied. Here we repeat the analysis with a delay (i.e., a lag) of  $t_0 = 5$  days and  $t_0 = 9$  days (Section D.2). (3) Also considered is the case whereby NPIs only become gradually effective. Specifically, the effect of NPIs is modeled with a first-order spline, where NPIs have a linearly increasing effect between  $t_0$  and  $t_1$ , and a constant effect after  $t_1$  (Section D.3). (4) The assumption that NPIs can only reduce the number of new cases is relaxed. That is, the effect is unbounded and NPIs can lead to a potential increase in the number of new cases (Section D.4).

### D.1. Analysis starting with data from 10 cases onward

In our main analysis, we excluded observations with fewer than 100 cumulative cases. The reason is that countries needed time to set up their documentation practices. Fig. 6 compares the estimates for NPIs from our main analysis with estimates from the same model where only observations with fewer than 10 cases were excluded. Overall, estimated posterior means for all NPIs remain fairly similar. The relative effectiveness changes slightly, with border closures and work bans becoming on average less effective than event bans.

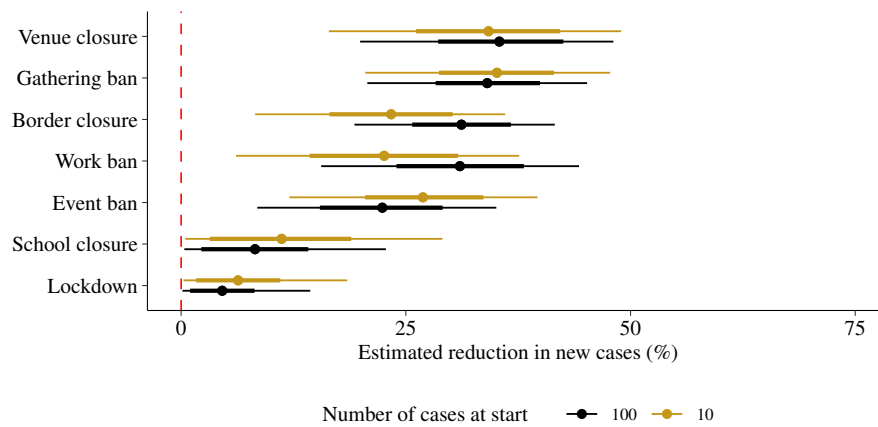

**Fig. 6** Estimated reduction (posterior mean as dots with 80% and 95% credible interval as thick and thin lines, respectively) in the number of new cases (in %) for each non-pharmaceutical intervention (NPI) by varying the number of cases at start. Compared are 100 (main analysis) and 10 cases at the start of the analysis.

*D.2. Comparison of other time delays  $t_0$  after which NPIs become effective*

In our main analysis, we assumed a time delay of  $t_0 = 7$  days between the moment when an NPI becomes effective and the moment when it can influence the rate of new cases. To check sensitivity w.r.t. this choice, we repeat the analysis with a time delay of  $t_0 = 5$  days and  $t_0 = 9$  days. The estimation results are detailed in Fig. 7, confirming that, overall, the effects remain qualitatively similar. The effects of work and gathering bans are reduced for a longer time delay, while the effect of event bans is increased.

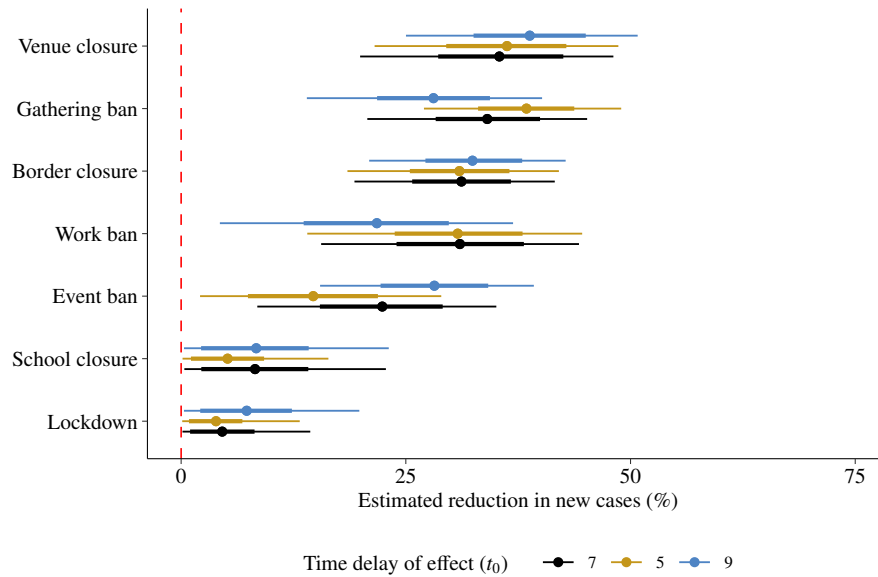

**Fig. 7** Estimated reduction (posterior mean as dots with 80% and 95% credible interval as thick and thin lines, respectively) in the number of new cases (in %) for each non-pharmaceutical intervention (NPI) by varying the time delay of effects ( $t_0$ ). Compared are 7 (main analysis), 5, and 9 days of delay until NPIs are assumed to have an effect.

### D.3. Comparison of influence functions

In our main analysis, we assumed a constant effectiveness for each NPI after a time delay of  $t_0 = 7$  days. We now consider the case where NPIs become gradually effective. Specifically, we consider an alternative influence function, i.e., a first-order spline. Here the NPI has a linearly increasing effect between day  $t_0 = 5$  and  $t_1 = 12$ , followed by a constant effect after day  $t_1 = 12$ . The resulting specification of the influence function is

$$f_{\theta}^{FOS}(t) = \begin{cases} 0, & \text{if } t \leq t_0, \\ \theta \left( \frac{t-t_0}{t_1-t_0} \right), & \text{if } t_0 \leq t \leq t_1, \\ \theta, & \text{if } t > t_1. \end{cases} \quad (1)$$

Overall, Fig. 8 shows that the parameter estimates for the NPIs remain qualitatively similar. The effect of venue closures is increased, while the effect of work bans is reduced.

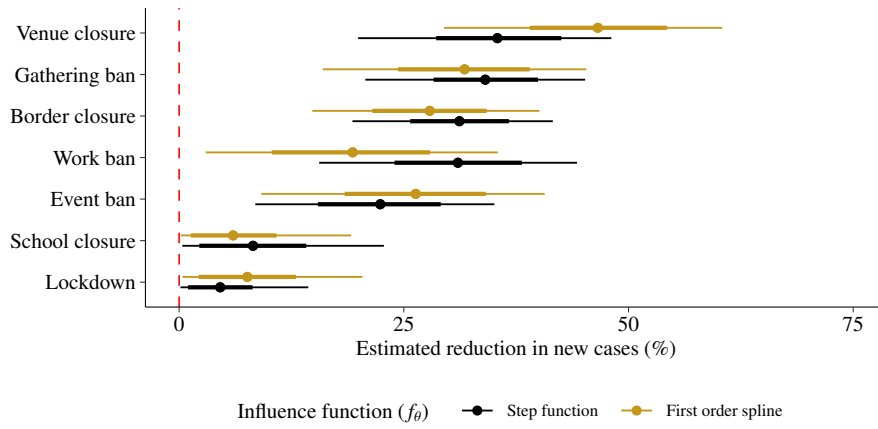

**Fig. 8** Estimated reduction (posterior mean as dots with 80% and 95% credible interval as thick and thin lines, respectively) in the number of new cases (in %) for each non-pharmaceutical intervention (NPI) by influence function ( $f_{\theta}$ ). Compared is a step function with a constant effect after a delay of  $t_0 = 7$  days (main analysis) and a first-order spline with a linearly increasing effect between day  $t_0 = 5$  and  $t_1 = 12$ , followed by a constant effect after day  $t_1 = 12$ .

*D.4. Relaxing the assumption that non-pharmaceutical interventions cannot increase the number of new cases*

In our main analysis, we assumed that the effect of NPIs is non-positive and their implementation will not lead to an increase in the number of new cases (i.e.,  $\theta_m$  has an upper bound at 0). Now, this assumption is relaxed by allowing NPIs to increase the number of new cases (i.e.,  $\theta_m$  is unbounded). In Fig. 9, the estimates between the bounded and unbounded specification of our model are compared. NPIs that lead to a clear reduction in the bounded model also lead to a reduction in the unbounded model and the effect sizes are almost equal. Thus, overall, the relative ranking among NPIs appears similar. For school closures and lockdowns, the range of credible effects is large and includes positive or even negative effects.

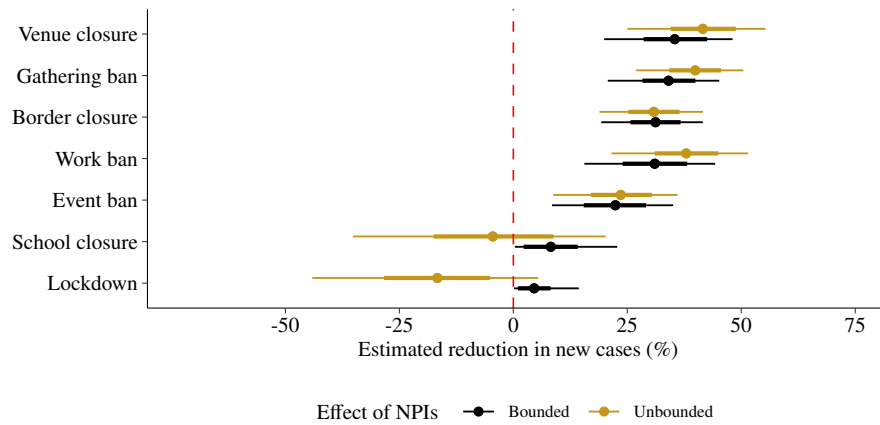

**Fig. 9** Estimated reduction (posterior mean as dots with 80% and 95% credible interval as thick and thin lines, respectively) in the number of new cases (in %) for each non-pharmaceutical intervention (NPI) for the two cases where the parameters  $\theta_m$  were bounded to have non-positive effects so that NPIs can only reduce the number of new cases (main analysis), or unbounded to have all possible effects, i.e., including a possible increase in the number of new cases.



### E. Model comparison

The sensitivity analyses of Section D involve several variants of the model used in the main analysis while keeping the number of parameters and the data used fixed. It is hence of interest to perform a formal comparison. Based on the so-called ELPD (a metric for model comparison in Bayesian analysis<sup>6</sup>), a first-order spline and a delay of  $t_0 = 9$  days are favored (see Tbl. 5).

| Influence function ( $f_\theta$ ) | Time delay ( $t_0, t_1$ ) | ELPD     | SE    | $\Delta$ ELPD | $\Delta$ SE |
|-----------------------------------|---------------------------|----------|-------|---------------|-------------|
| First order spline                | $t_0 = 5, t_1 = 12$       | -5728.43 | 49.90 | 0.00          | 0.00        |
| Step function                     | $t_0 = 9$                 | -5751.56 | 49.40 | -23.13        | 4.11        |
| Step function                     | $t_0 = 7$                 | -5767.20 | 48.96 | -38.77        | 6.48        |
| Step function                     | $t_0 = 5$                 | -5791.65 | 48.74 | -63.22        | 10.96       |

Table 5: Model comparison regarding influence function and time delay based on leave-one-out cross-validated expected log pointwise predictive density, ELPD for short<sup>6</sup>. SE is the standard error of the ELPD,  $\Delta$  ELPD is the absolute difference in the ELPD between the first and all other models, and  $\Delta$  SE is the standard error in the difference.

## F. Number of new cases if non-pharmaceutical interventions would not have been implemented

We illustrate the effectiveness of non-pharmaceutical interventions (NPIs) on the number of new COVID-19 cases. For this purpose, we take the mean estimate of the corresponding NPI and predict the number of new cases if the NPI would not have been implemented. Formally, the predicted number of new cases without NPI  $m'$  is computed as

$$\eta_{r,d}^{-m'} = \alpha_r + \gamma_{w(d)} + \sum_{m \neq m'}^M \theta_m(T_{r,d}^m), \quad (2)$$

$$\mu_{r,d}^{-m'} = C_{r,d} \exp(\eta_{r,d}^{-m'}), \quad (3)$$

where  $\mu_{r,d}^{-m'}$  is the average number of new cases without measure  $m'$  and  $C_{r,d}$  is the documented cumulative number of cases (starting from 100 cases). Note that this is contrary to a counterfactual analysis where the cumulative number of cases would need to be updated based on the predicted number of new cases. Instead, we chose the observed cumulative number of cases in each step to illustrate model fit and effectiveness of NPIs.

Fig. 10 shows the hypothetical predictions for all countries, thereby illustrating the estimated effectiveness of NPIs by our model. Overall, this exercise demonstrates that countries have potentially averted a large number of cases by implementing NPIs. More effective NPIs, e.g., venue closures, exhibit a higher relative reduction. But also less effective NPIs, e.g., event bans, can accumulate to a large overall effect when they are implemented early.

To assess the model fit, Fig. 10 also compares the estimated number of new cases (when the country implemented all its NPIs) to the observed (documented) number of new cases. For most countries, our model fits the observed number of cases reasonably well when considering that, for some countries, the observed time series is subject to variability. By specification, our model is not designed to fit this strong variability as it only adapts to country-specific differences in the constant background rate, weekday effects, and common effects from the implementation of NPIs. As a result, our model does not overfit to noise and the time series of the estimated number of new cases appear more steady.

In some countries, for instance Australia, Austria, and Germany, we observe that the actual documented number of cases is lower than the prediction of our model towards the end of the study period. These countries seem to have been more effective in reducing transmission rates than predicted by our model. This may point to country-specific, synergistic effects across different NPIs, suggesting a larger impact than implied by our estimates.

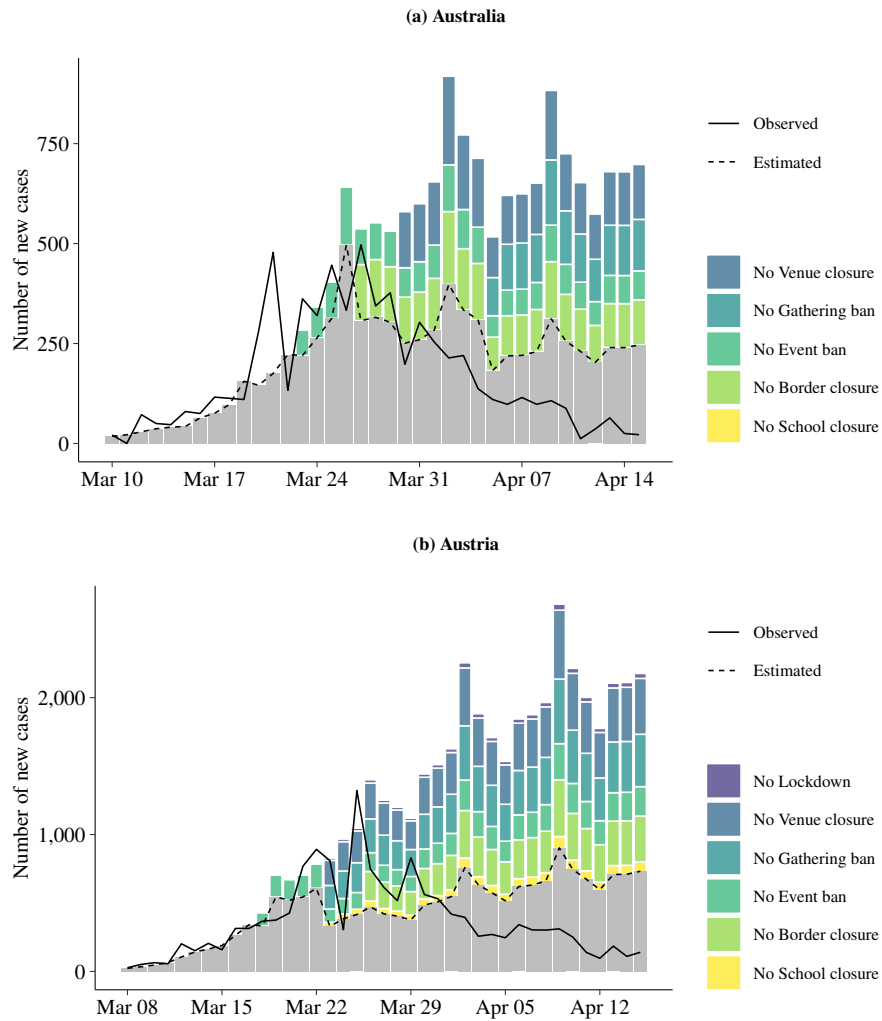

**Fig. 10** Hypothetical number of daily new cases if non-pharmaceutical interventions (NPIs) would not have been implemented. The stacked bars illustrate how the mean estimated number of new cases would have changed if NPIs would *not* have been enforced. The solid line refers to the observed (documented) and the dashed line to the estimated number of new cases. The NPIs are shown for the time period in which they have been implemented while considering that their effect is subject to a time delay of 7 days.

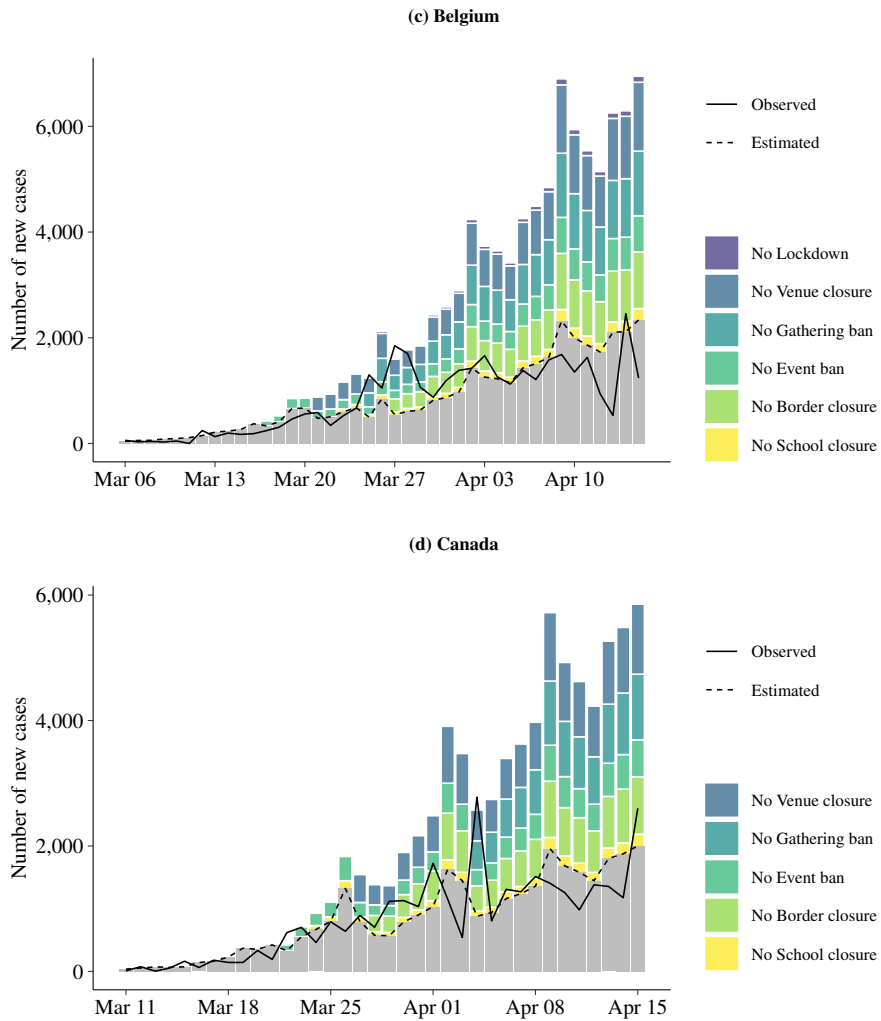

**Fig. 10** Hypothetical number of daily new cases if non-pharmaceutical interventions (NPIs) would not have been implemented. The stacked bars illustrate how the mean estimated number of new cases would have changed if NPIs would *not* have been enforced. The solid line refers to the observed (documented) and the dashed line to the estimated number of new cases. The NPIs are shown for the time period in which they have been implemented while considering that their effect is subject to a time delay of 7 days.

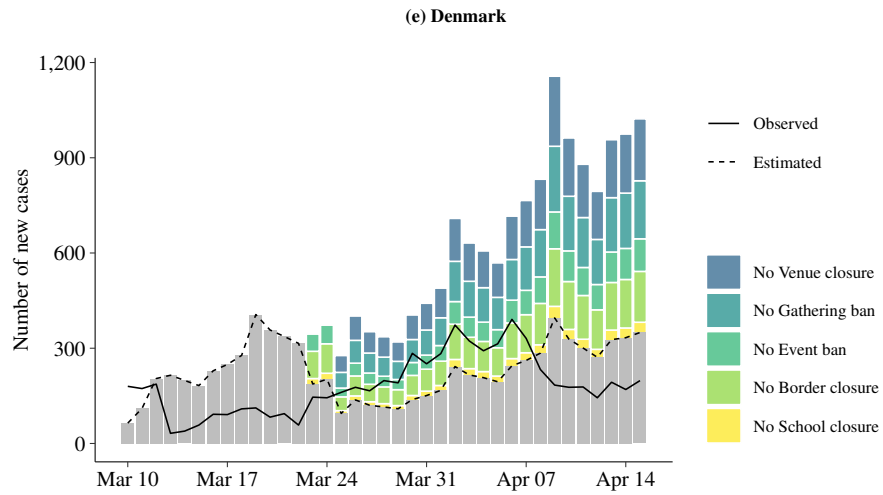

**Fig. 10** Hypothetical number of daily new cases if non-pharmaceutical interventions (NPIs) would not have been implemented. The stacked bars illustrate how the mean estimated number of new cases would have changed if NPIs would *not* have been enforced. The solid line refers to the observed (documented) and the dashed line to the estimated number of new cases. The NPIs are shown for the time period in which they have been implemented while considering that their effect is subject to a time delay of 7 days.

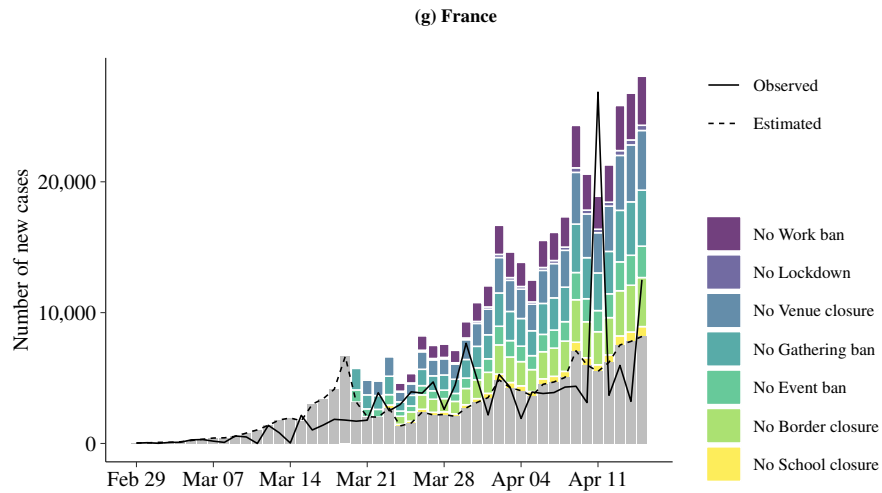

**Fig. 10** Hypothetical number of daily new cases if non-pharmaceutical interventions (NPIs) would not have been implemented. The stacked bars illustrate how the mean estimated number of new cases would have changed if NPIs would *not* have been enforced. The solid line refers to the observed (documented) and the dashed line to the estimated number of new cases. The NPIs are shown for the time period in which they have been implemented while considering that their effect is subject to a time delay of 7 days.

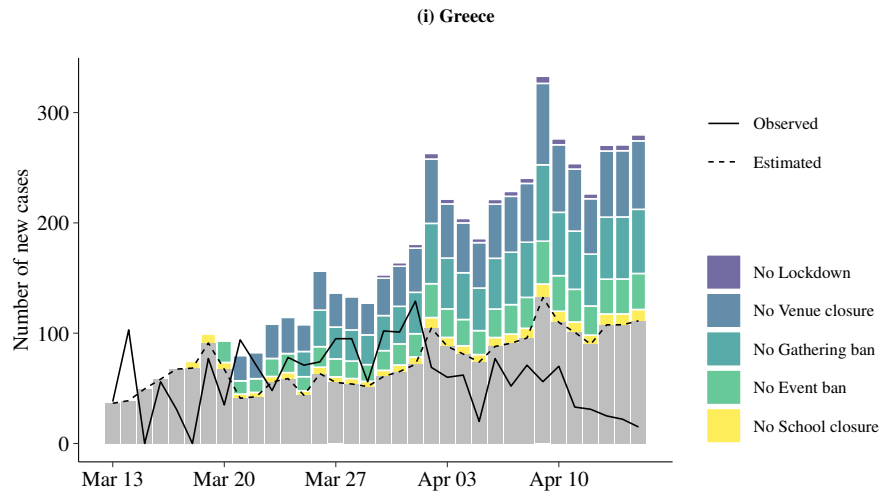

**Fig. 10** Hypothetical number of daily new cases if non-pharmaceutical interventions (NPIs) would not have been implemented. The stacked bars illustrate how the mean estimated number of new cases would have changed if NPIs would *not* have been enforced. The solid line refers to the observed (documented) and the dashed line to the estimated number of new cases. The NPIs are shown for the time period in which they have been implemented while considering that their effect is subject to a time delay of 7 days.

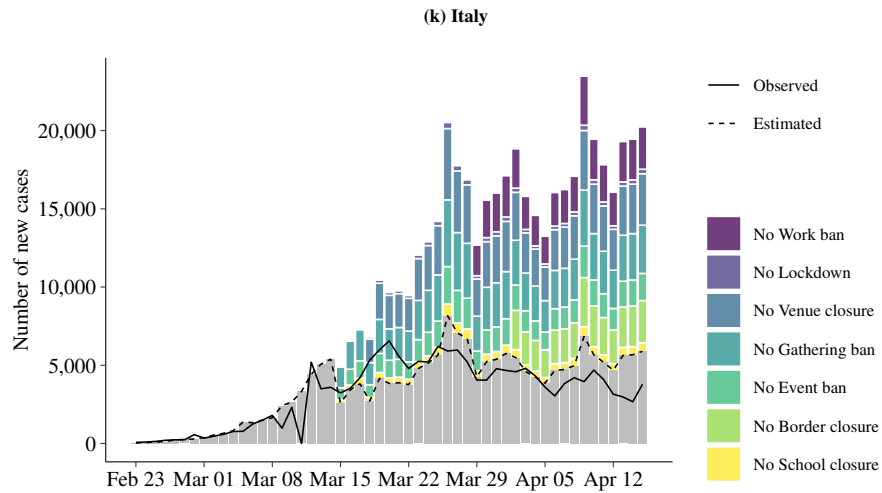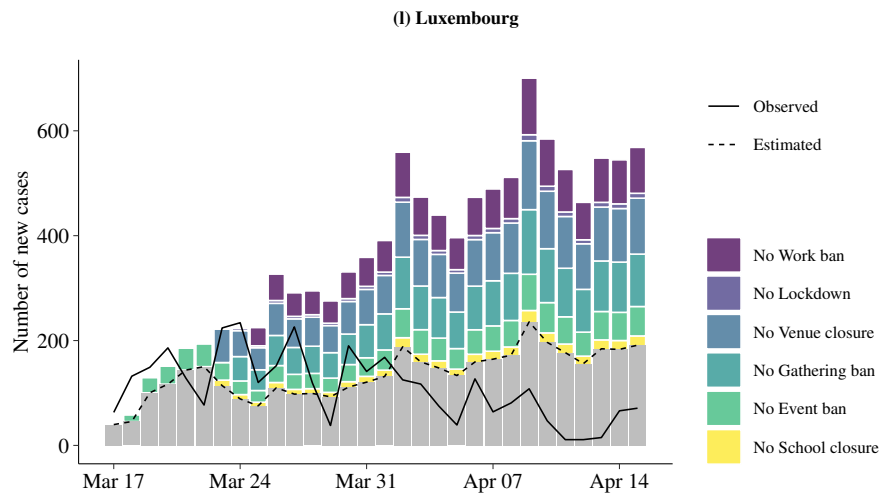

**Fig. 10** Hypothetical number of daily new cases if non-pharmaceutical interventions (NPIs) would not have been implemented. The stacked bars illustrate how the mean estimated number of new cases would have changed if NPIs would *not* have been enforced. The solid line refers to the observed (documented) and the dashed line to the estimated number of new cases. The NPIs are shown for the time period in which they have been implemented while considering that their effect is subject to a time delay of 7 days.



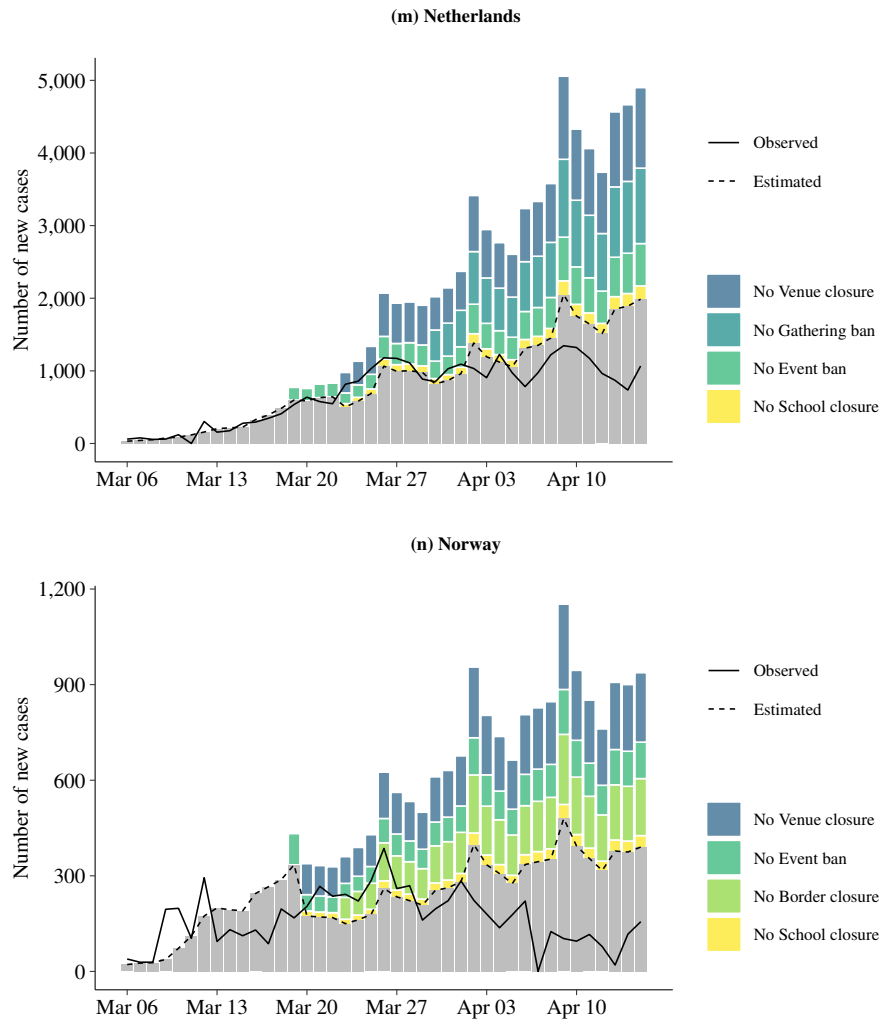

**Fig. 10** Hypothetical number of daily new cases if non-pharmaceutical interventions (NPIs) would not have been implemented. The stacked bars illustrate how the mean estimated number of new cases would have changed if NPIs would *not* have been enforced. The solid line refers to the observed (documented) and the dashed line to the estimated number of new cases. The NPIs are shown for the time period in which they have been implemented while considering that their effect is subject to a time delay of 7 days.

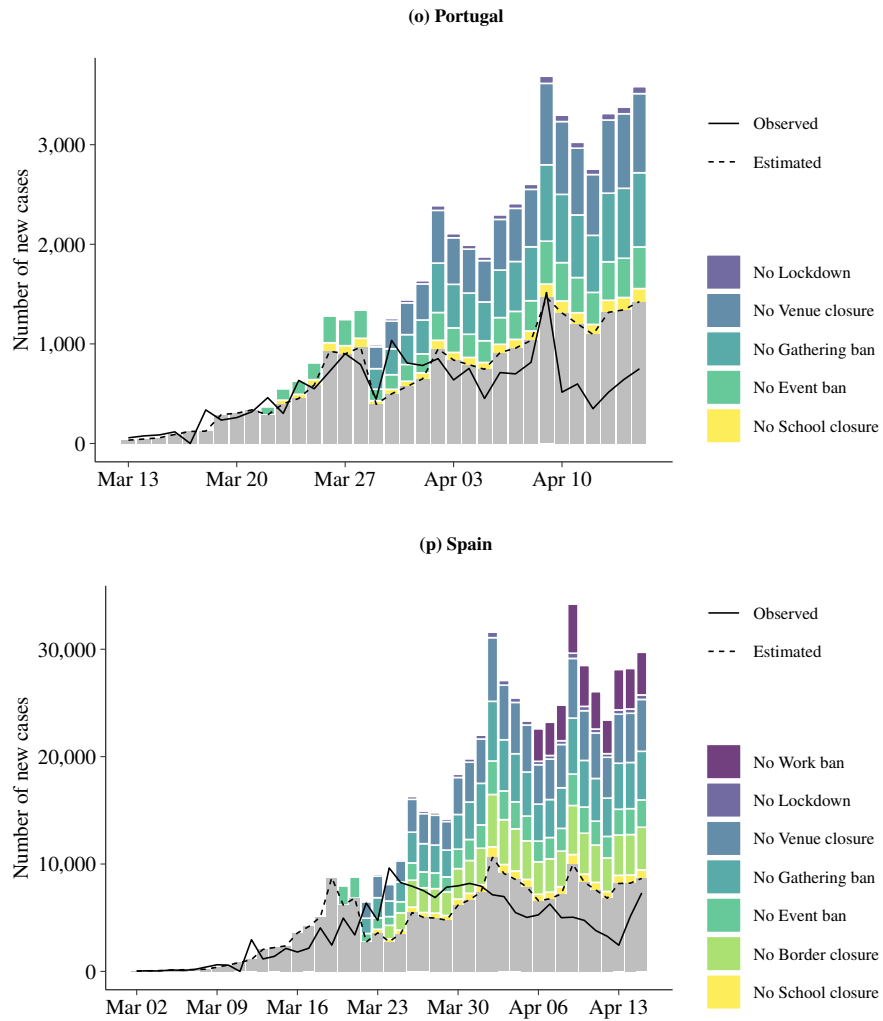

**Fig. 10** Hypothetical number of daily new cases if non-pharmaceutical interventions (NPIs) would not have been implemented. The stacked bars illustrate how the mean estimated number of new cases would have changed if NPIs would *not* have been enforced. The solid line refers to the observed (documented) and the dashed line to the estimated number of new cases. The NPIs are shown for the time period in which they have been implemented while considering that their effect is subject to a time delay of 7 days.

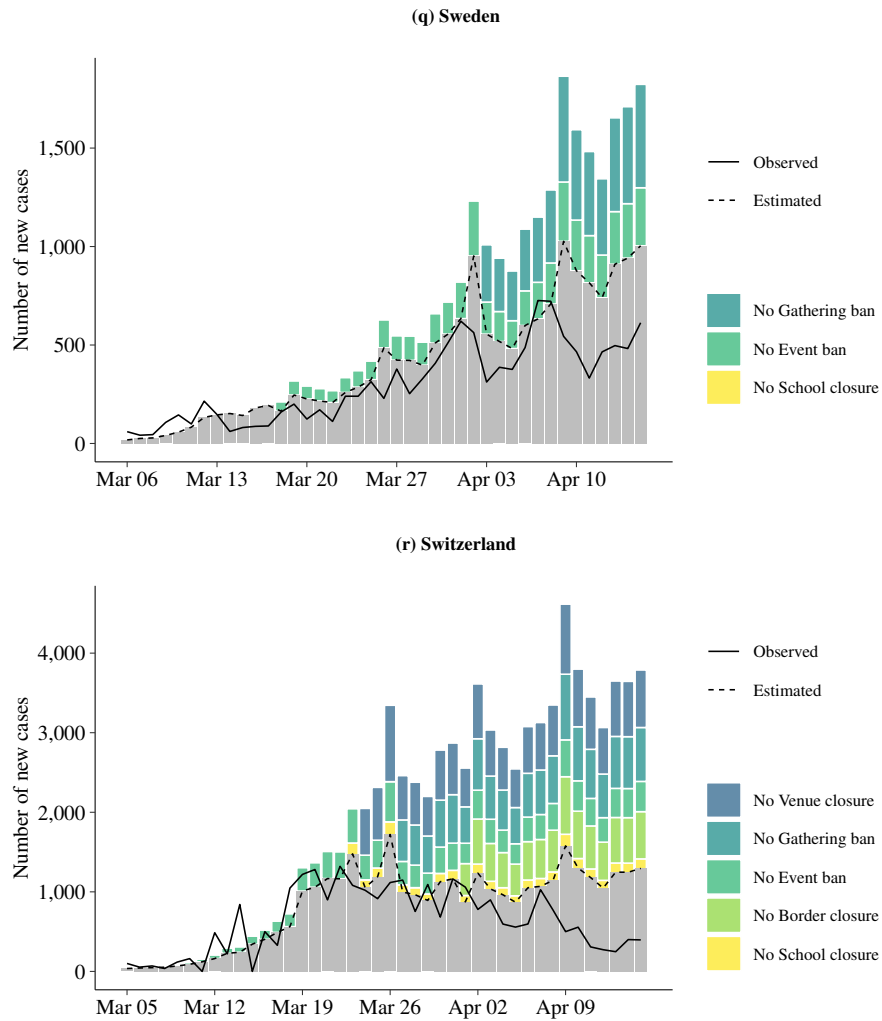

**Fig. 10** Hypothetical number of daily new cases if non-pharmaceutical interventions (NPIs) would not have been implemented. The stacked bars illustrate how the mean estimated number of new cases would have changed if NPIs would *not* have been enforced. The solid line refers to the observed (documented) and the dashed line to the estimated number of new cases. The NPIs are shown for the time period in which they have been implemented while considering that their effect is subject to a time delay of 7 days.

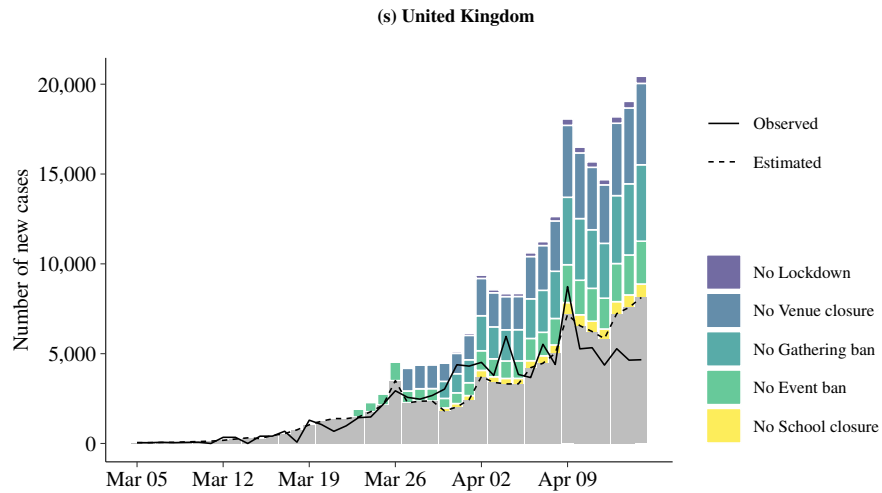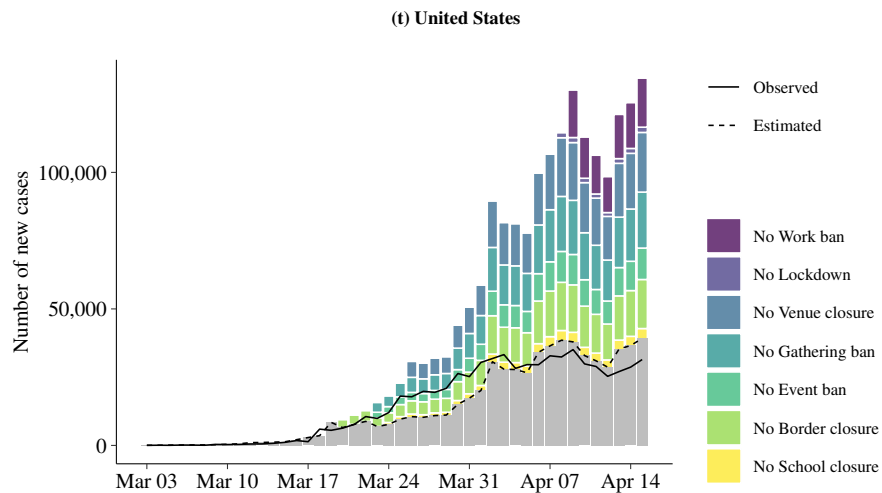

**Fig. 10** Hypothetical number of daily new cases if non-pharmaceutical interventions (NPIs) would not have been implemented. The stacked bars illustrate how the mean estimated number of new cases would have changed if NPIs would *not* have been enforced. The solid line refers to the observed (documented) and the dashed line to the estimated number of new cases. The NPIs are shown for the time period in which they have been implemented while considering that their effect is subject to a time delay of 7 days.

## **G. Data on non-pharmaceutical interventions**

### *G.1. Data collection*

Data on non-pharmaceutical interventions (NPIs) have been collected systematically in six steps.

1. Granular information on NPIs have been gathered from government resources and news outlets by our team.
2. After collecting data for the first few countries, NPIs have been classified into seven categories: (1) school closures, (2) border closures, (3) public event bans, (4) gathering bans, (5) venue closures (e.g., shops, bars, restaurants, and other recreational activities), (6) lockdowns prohibiting public movements without valid reason, and (7) work bans on non-essential business activities. The resulting classification has later been cross-checked against the encoding from the Imperial College COVID-19 Response Team<sup>7</sup> and the “Coronavirus Government Response Tracker” from the University of Oxford<sup>7</sup>.
3. The date of NPIs has been referred to as the first day a measure went into effect. For instance, if a country banned events with more than 5,000 people on March 1 and events with more than 1,000 people on March 5, then March 1 has been chosen as the date of event bans.
4. NPIs for countries that subsequently followed in the data collection have been encoded accordingly.
5. The date of NPIs has been collected for each country or region. For countries that are less centrally managed, regional dates have been aggregated to the national level by choosing the first date after which two thirds of regions have implemented an NPI.
6. Local residents and/or native speakers have been recruited from each country in order to check our encoding. The reason for this is that countries have often used different legal terms to refer to the same NPI. Also, checking with local residents has helped to determine, for instance, whether the NPI was actually enforced or just recommended.

### *G.2. Data Sources*

In Tbl. 6, we provide sources of our data on NPIs at a national level. For less centrally managed countries, the aggregated (national level) date of the NPI is shown and the regional sources are displayed in Tbl. 7 (United States), Tbl. 8 (Germany), Tbl. 9 (Spain), Tbl. 10 (Canada), Tbl. 11 (Australia), and Tbl. 12 (Italy). Note that border closures is defined as a national closure of borders and is thus only considered at a national level.

In the following, we want to highlight some encoding decisions that were subject to internal discussions.

---

<sup>7</sup><https://www.bsg.ox.ac.uk/research/research-projects/coronavirus-government-response-tracker>

- School closure in New South Wales (Australia): Schools have remained technically open but attendance dropped below 5%. Therefore, schools have been encoded as closed.
- Border closure in the US: The US has not stopped flights with all countries but closed their land borders and has suspended travel from a huge number of Asian and European countries. Hence, US borders have been encoded as closed.
- Border closure in Germany: Germany has not closed its borders with Belgium and the Netherlands, therefore not all land borders have been closed and we have decided to encode them as open.
- School closure in Sweden: Only upper secondary schools (16+ y/o) and universities are studying from home, while other schools are still open. Thus, Swedish schools have been encoded as open.

| Country   | NPI            | Date effective | Source                                                                                                                                                                                                                                                                                                                                      |
|-----------|----------------|----------------|---------------------------------------------------------------------------------------------------------------------------------------------------------------------------------------------------------------------------------------------------------------------------------------------------------------------------------------------|
| Australia | Event ban      | 2020-03-16     | Date derived by aggregation, see Tab. 11                                                                                                                                                                                                                                                                                                    |
|           | Gathering ban  | 2020-04-01     | Date derived by aggregation, see Tab. 11                                                                                                                                                                                                                                                                                                    |
|           | Border closure | 2020-03-20     | <a href="https://www.pm.gov.au/media/border-restrictions">https://www.pm.gov.au/media/border-restrictions</a>                                                                                                                                                                                                                               |
|           | Venue closure  | 2020-03-23     | Date derived by aggregation, see Tab. 11                                                                                                                                                                                                                                                                                                    |
| Austria   | Event ban      | 2020-03-11     | <a href="https://www.bundeskanzleramt.gv.at/bundeskanzleramt/nachrichten-der-bundesregierung/2020/weitere-massnahmen-gegen-ausbreitung-des-coronavirus.html">https://www.bundeskanzleramt.gv.at/bundeskanzleramt/nachrichten-der-bundesregierung/2020/weitere-massnahmen-gegen-ausbreitung-des-coronavirus.html</a>                         |
|           | Gathering ban  | 2020-03-16     | <a href="https://www.reuters.com/article/us-health-coronavirus-austria/austria-imposes-major-restrictions-on-movement-over-coronavirus-idUSKBN2120D8">https://www.reuters.com/article/us-health-coronavirus-austria/austria-imposes-major-restrictions-on-movement-over-coronavirus-idUSKBN2120D8</a>                                       |
|           | School closure | 2020-03-16     | <a href="https://www.reuters.com/article/us-health-coronavirus-austria/austria-closing-schools-over-coronavirus-as-border-checks-take-effect-idUSKBN20Y2YC">https://www.reuters.com/article/us-health-coronavirus-austria/austria-closing-schools-over-coronavirus-as-border-checks-take-effect-idUSKBN20Y2YC</a>                           |
|           | Border closure | 2020-03-19     | <a href="https://www.reuters.com/article/us-health-coronavirus-austria/coronavirus-infections-top-2000-in-austria-more-border-controls-imposed-idUSKBN2160WK">https://www.reuters.com/article/us-health-coronavirus-austria/coronavirus-infections-top-2000-in-austria-more-border-controls-imposed-idUSKBN2160WK</a>                       |
|           | Venue closure  | 2020-03-16     | <a href="https://www.bundeskanzleramt.gv.at/bundeskanzleramt/nachrichten-der-bundesregierung/2020/bundesregierung-praesentiert-aktuelle-beschlusse-zum-coronavirus.html">https://www.bundeskanzleramt.gv.at/bundeskanzleramt/nachrichten-der-bundesregierung/2020/bundesregierung-praesentiert-aktuelle-beschlusse-zum-coronavirus.html</a> |
|           | Lockdown       | 2020-03-16     | <a href="https://www.sozialministerium.at/Informationen-zum-Coronavirus/Coronavirus---Aktuelle-Ma%C3%9Fnahmen.html">https://www.sozialministerium.at/Informationen-zum-Coronavirus/Coronavirus---Aktuelle-Ma%C3%9Fnahmen.html</a>                                                                                                           |
| Belgium   | Event ban      | 2020-03-10     | <a href="https://www.info-coronavirus.be/en/news/protect-yourself-and-protect-the-others/">https://www.info-coronavirus.be/en/news/protect-yourself-and-protect-the-others/</a>                                                                                                                                                             |
|           | Gathering ban  | 2020-03-18     | <a href="https://de.reuters.com/article/health-coronavirus-belgium-lockdown-idUSB5N28S003">https://de.reuters.com/article/health-coronavirus-belgium-lockdown-idUSB5N28S003</a>                                                                                                                                                             |
|           | School closure | 2020-03-16     | <a href="https://www.info-coronavirus.be/en/2020/03/12/phase-2-maintained-transition-to-the-federal-phase-and-additional-measures/">https://www.info-coronavirus.be/en/2020/03/12/phase-2-maintained-transition-to-the-federal-phase-and-additional-measures/</a>                                                                           |
|           | Border closure | 2020-03-20     | <a href="https://www.politico.eu/article/belgium-closes-borders-for-non-essential-travel/">https://www.politico.eu/article/belgium-closes-borders-for-non-essential-travel/</a>                                                                                                                                                             |
|           | Venue closure  | 2020-03-14     | <a href="https://www.info-coronavirus.be/en/2020/03/12/phase-2-maintained-transition-to-the-federal-phase-and-additional-measures/">https://www.info-coronavirus.be/en/2020/03/12/phase-2-maintained-transition-to-the-federal-phase-and-additional-measures/</a>                                                                           |
|           | Lockdown       | 2020-03-18     | <a href="https://de.reuters.com/article/health-coronavirus-belgium-lockdown-idUSB5N28S003">https://de.reuters.com/article/health-coronavirus-belgium-lockdown-idUSB5N28S003</a>                                                                                                                                                             |
| Canada    | Event ban      | 2020-03-12     | Date derived by aggregation, see Tab. 10                                                                                                                                                                                                                                                                                                    |
|           | Gathering ban  | 2020-03-27     | Date derived by aggregation, see Tab. 10                                                                                                                                                                                                                                                                                                    |
|           | School closure | 2020-03-15     | Date derived by aggregation, see Tab. 10                                                                                                                                                                                                                                                                                                    |

|         |                |            |                                                                                                                                                                                                                                                                                                                                                                       |
|---------|----------------|------------|-----------------------------------------------------------------------------------------------------------------------------------------------------------------------------------------------------------------------------------------------------------------------------------------------------------------------------------------------------------------------|
|         | Border closure | 2020-03-21 | <a href="https://www.canada.ca/en/public-health/services/diseases/2019-novel-coronavirus-infection/canadas-reponse.html?topic=tilelink">https://www.canada.ca/en/public-health/services/diseases/2019-novel-coronavirus-infection/canadas-reponse.html?topic=tilelink</a>                                                                                             |
|         | Venue closure  | 2020-03-17 | Date derived by aggregation, see Tab. 10                                                                                                                                                                                                                                                                                                                              |
| Denmark | Event ban      | 2020-03-16 | <a href="https://www.regeringen.dk/nyheder/pressemeddelelse-11-marts-i-spejlsalen/">https://www.regeringen.dk/nyheder/pressemeddelelse-11-marts-i-spejlsalen/</a>                                                                                                                                                                                                     |
|         | Gathering ban  | 2020-03-18 | <a href="https://www.reuters.com/article/us-health-coronavirus-denmark/denmark-bans-crowds-of-over-10-people-to-curb-coronavirus-idUSKBN2143KG">https://www.reuters.com/article/us-health-coronavirus-denmark/denmark-bans-crowds-of-over-10-people-to-curb-coronavirus-idUSKBN2143KG</a>                                                                             |
|         | School closure | 2020-03-16 | <a href="https://www.regeringen.dk/nyheder/pressemeddelelse-11-marts-i-spejlsalen/">https://www.regeringen.dk/nyheder/pressemeddelelse-11-marts-i-spejlsalen/</a>                                                                                                                                                                                                     |
|         | Border closure | 2020-03-16 | <a href="https://www.oresunddirekt.dk/en/news/danish-borders-closed-due-to-coronavirus-covid-19">https://www.oresunddirekt.dk/en/news/danish-borders-closed-due-to-coronavirus-covid-19</a>                                                                                                                                                                           |
|         | Venue closure  | 2020-03-18 | <a href="https://www.reuters.com/article/us-health-coronavirus-denmark/denmark-bans-crowds-of-over-10-people-to-curb-coronavirus-idUSKBN2143KG">https://www.reuters.com/article/us-health-coronavirus-denmark/denmark-bans-crowds-of-over-10-people-to-curb-coronavirus-idUSKBN2143KG</a>                                                                             |
| Finland | Event ban      | 2020-03-16 | <a href="https://valtioneuvosto.fi/en/article/-/asset_publisher/10616/hallitus-totesi-suomen-olevan-poikkeusoloissa-koronavirustilanteen-vuoksi">https://valtioneuvosto.fi/en/article/-/asset_publisher/10616/hallitus-totesi-suomen-olevan-poikkeusoloissa-koronavirustilanteen-vuoksi</a>                                                                           |
|         | Gathering ban  | 2020-03-16 | <a href="https://valtioneuvosto.fi/en/article/-/asset_publisher/10616/hallitus-totesi-suomen-olevan-poikkeusoloissa-koronavirustilanteen-vuoksi">https://valtioneuvosto.fi/en/article/-/asset_publisher/10616/hallitus-totesi-suomen-olevan-poikkeusoloissa-koronavirustilanteen-vuoksi</a>                                                                           |
|         | School closure | 2020-03-16 | <a href="https://valtioneuvosto.fi/en/article/-/asset_publisher/10616/hallitus-totesi-suomen-olevan-poikkeusoloissa-koronavirustilanteen-vuoksi">https://valtioneuvosto.fi/en/article/-/asset_publisher/10616/hallitus-totesi-suomen-olevan-poikkeusoloissa-koronavirustilanteen-vuoksi</a>                                                                           |
|         | Border closure | 2020-03-19 | <a href="https://valtioneuvosto.fi/en/article/-/asset_publisher/1410869/suomen-rajaliikennetta-aletaan-rajoittaa-elakkeella-olevia-rajavartijoita-ja-poliiseja-voidaan-kutsua-toihin">https://valtioneuvosto.fi/en/article/-/asset_publisher/1410869/suomen-rajaliikennetta-aletaan-rajoittaa-elakkeella-olevia-rajavartijoita-ja-poliiseja-voidaan-kutsua-toihin</a> |
|         | Venue closure  | 2020-03-16 | <a href="https://valtioneuvosto.fi/en/article/-/asset_publisher/10616/hallitus-totesi-suomen-olevan-poikkeusoloissa-koronavirustilanteen-vuoksi">https://valtioneuvosto.fi/en/article/-/asset_publisher/10616/hallitus-totesi-suomen-olevan-poikkeusoloissa-koronavirustilanteen-vuoksi</a>                                                                           |
| France  | Event ban      | 2020-03-13 | <a href="https://www.bbc.com/news/world-europe-51892477">https://www.bbc.com/news/world-europe-51892477</a>                                                                                                                                                                                                                                                           |
|         | Gathering ban  | 2020-03-13 | <a href="https://www.bbc.com/news/world-europe-51892477">https://www.bbc.com/news/world-europe-51892477</a>                                                                                                                                                                                                                                                           |
|         | School closure | 2020-03-16 | <a href="https://www.bbc.com/news/world-europe-51892477">https://www.bbc.com/news/world-europe-51892477</a>                                                                                                                                                                                                                                                           |
|         | Border closure | 2020-03-17 | <a href="https://www.gouvernement.fr/info-coronavirus">https://www.gouvernement.fr/info-coronavirus</a>                                                                                                                                                                                                                                                               |
|         | Venue closure  | 2020-03-14 | <a href="https://www.gouvernement.fr/partage/11444-declaration-de-m-edouard-philippe-premier-ministre-sur-le-covid-19">https://www.gouvernement.fr/partage/11444-declaration-de-m-edouard-philippe-premier-ministre-sur-le-covid-19</a>                                                                                                                               |
|         | Lockdown       | 2020-03-17 | <a href="https://www.gouvernement.fr/info-coronavirus">https://www.gouvernement.fr/info-coronavirus</a>                                                                                                                                                                                                                                                               |
|         | Work ban       | 2020-03-17 | <a href="https://www.gouvernement.fr/info-coronavirus">https://www.gouvernement.fr/info-coronavirus</a>                                                                                                                                                                                                                                                               |
| Germany | Event ban      | 2020-03-11 | Date derived by aggregation, see Tab. 8                                                                                                                                                                                                                                                                                                                               |
|         | Gathering ban  | 2020-03-23 | Date derived by aggregation, see Tab. 8                                                                                                                                                                                                                                                                                                                               |
|         | School closure | 2020-03-17 | Date derived by aggregation, see Tab. 8                                                                                                                                                                                                                                                                                                                               |



|                |                |            |                                                                                                                                                                                                                                                                                                                   |
|----------------|----------------|------------|-------------------------------------------------------------------------------------------------------------------------------------------------------------------------------------------------------------------------------------------------------------------------------------------------------------------|
|                | Venue closure  | 2020-03-16 | Date derived by aggregation, see Tab. 8                                                                                                                                                                                                                                                                           |
| Greece         | Event ban      | 2020-03-13 | <a href="https://www.reuters.com/article/us-health-coronavirus-greece-measures/greece-to-shut-shops-quarantine-all-arrivals-from-abroad-idUSKBN2131SF">https://www.reuters.com/article/us-health-coronavirus-greece-measures/greece-to-shut-shops-quarantine-all-arrivals-from-abroad-idUSKBN2131SF</a>           |
|                | Gathering ban  | 2020-03-18 | <a href="https://www.reuters.com/article/us-health-coronavirus-greece-curfew/greece-imposes-lockdown-after-coronavirus-infections-jump-idUSKBN2190Z1">https://www.reuters.com/article/us-health-coronavirus-greece-curfew/greece-imposes-lockdown-after-coronavirus-infections-jump-idUSKBN2190Z1</a>             |
|                | School closure | 2020-03-11 | <a href="https://www.reuters.com/article/us-health-coronavirus-greece-education/greece-shuts-schools-universities-to-halt-coronavirus-spread-idUSKBN20X28V">https://www.reuters.com/article/us-health-coronavirus-greece-education/greece-shuts-schools-universities-to-halt-coronavirus-spread-idUSKBN20X28V</a> |
|                | Venue closure  | 2020-03-14 | <a href="https://www.cnn.gr/news/ellada/story/211153/koronoios-poia-katastimata-kleinoy-n-poia-menoyn-anoikta-lista">https://www.cnn.gr/news/ellada/story/211153/koronoios-poia-katastimata-kleinoy-n-poia-menoyn-anoikta-lista</a>                                                                               |
|                | Lockdown       | 2020-03-23 | <a href="https://www.reuters.com/article/us-health-coronavirus-greece-curfew/greece-imposes-lockdown-after-coronavirus-infections-jump-idUSKBN2190Z1">https://www.reuters.com/article/us-health-coronavirus-greece-curfew/greece-imposes-lockdown-after-coronavirus-infections-jump-idUSKBN2190Z1</a>             |
|                | Ireland        | Event ban  | 2020-03-12                                                                                                                                                                                                                                                                                                        |
| Gathering ban  |                | 2020-03-28 | <a href="https://www.gov.ie/en/publication/539d23-stay-at-home-the-latest-public-health-measures-to-prevent-the-spread/">https://www.gov.ie/en/publication/539d23-stay-at-home-the-latest-public-health-measures-to-prevent-the-spread/</a>                                                                       |
| School closure |                | 2020-03-12 | <a href="https://www.gov.ie/en/press-release/96eb4c-statement-from-the-national-public-health-emergency-team/">https://www.gov.ie/en/press-release/96eb4c-statement-from-the-national-public-health-emergency-team/</a>                                                                                           |
| Venue closure  |                | 2020-03-15 | <a href="https://www.gov.ie/en/press-release/20fc58-all-pubs-advised-to-close-until-march-29/">https://www.gov.ie/en/press-release/20fc58-all-pubs-advised-to-close-until-march-29/</a>                                                                                                                           |
| Lockdown       |                | 2020-03-28 | <a href="https://www.gov.ie/en/publication/539d23-stay-at-home-the-latest-public-health-measures-to-prevent-the-spread/">https://www.gov.ie/en/publication/539d23-stay-at-home-the-latest-public-health-measures-to-prevent-the-spread/</a>                                                                       |
| Work ban       |                | 2020-03-28 | <a href="https://www.gov.ie/en/publication/539d23-stay-at-home-the-latest-public-health-measures-to-prevent-the-spread/">https://www.gov.ie/en/publication/539d23-stay-at-home-the-latest-public-health-measures-to-prevent-the-spread/</a>                                                                       |
| Italy          | Event ban      | 2020-03-01 | Date derived by aggregation, see Tab. 12                                                                                                                                                                                                                                                                          |
|                | Gathering ban  | 2020-03-01 | Date derived by aggregation, see Tab. 12                                                                                                                                                                                                                                                                          |
|                | School closure | 2020-03-01 | Date derived by aggregation, see Tab. 12                                                                                                                                                                                                                                                                          |
|                | Border closure | 2020-03-26 | <a href="https://www.gazzettaufficiale.it/showNewsDetail?id=2553&amp;backTo=archivio&amp;anno=2020&amp;provenienza=archivio">https://www.gazzettaufficiale.it/showNewsDetail?id=2553&amp;backTo=archivio&amp;anno=2020&amp;provenienza=archivio</a>                                                               |
|                | Venue closure  | 2020-03-11 | Date derived by aggregation, see Tab. 12                                                                                                                                                                                                                                                                          |
|                | Lockdown       | 2020-03-11 | Date derived by aggregation, see Tab. 12                                                                                                                                                                                                                                                                          |
| Luxembourg     | Work ban       | 2020-03-22 | Date derived by aggregation, see Tab. 12                                                                                                                                                                                                                                                                          |
|                | Event ban      | 2020-03-11 | <a href="https://gouvernement.lu/fr/actualites/toutes_actualites/communiqués/2020/03-mars/11-conseil-gouvernement.html">https://gouvernement.lu/fr/actualites/toutes_actualites/communiqués/2020/03-mars/11-conseil-gouvernement.html</a>                                                                         |

|             |                |            |                                                                                                                                                                                                                                                                                                                                                                                                         |
|-------------|----------------|------------|---------------------------------------------------------------------------------------------------------------------------------------------------------------------------------------------------------------------------------------------------------------------------------------------------------------------------------------------------------------------------------------------------------|
|             | Gathering ban  | 2020-03-17 | <a href="https://coronavirus.gouvernement.lu/en/communications-officielles.gouvernement%2Ben%2Bactualites%2Btoutes_actualites%2Bcommuniques%2B2020%2B03-mars%2B17-declaration-premier-chd.html">https://coronavirus.gouvernement.lu/en/communications-officielles.gouvernement%2Ben%2Bactualites%2Btoutes_actualites%2Bcommuniques%2B2020%2B03-mars%2B17-declaration-premier-chd.html</a>               |
|             | School closure | 2020-03-16 | <a href="https://coronavirus.gouvernement.lu/en/communications-officielles.gouvernement%2Ben%2Bactualites%2Btoutes_actualites%2Bcommuniques%2B2020%2B03-mars%2B12-cdg-extraordinaire-coronavirus.html">https://coronavirus.gouvernement.lu/en/communications-officielles.gouvernement%2Ben%2Bactualites%2Btoutes_actualites%2Bcommuniques%2B2020%2B03-mars%2B12-cdg-extraordinaire-coronavirus.html</a> |
|             | Venue closure  | 2020-03-16 | <a href="https://coronavirus.gouvernement.lu/en/communications-officielles.gouvernement%2Ben%2Bactualites%2Btoutes_actualites%2Bcommuniques%2B2020%2B03-mars%2B15-nouvelles-mesures-coronavirus.html">https://coronavirus.gouvernement.lu/en/communications-officielles.gouvernement%2Ben%2Bactualites%2Btoutes_actualites%2Bcommuniques%2B2020%2B03-mars%2B15-nouvelles-mesures-coronavirus.html</a>   |
|             | Lockdown       | 2020-03-17 | <a href="https://coronavirus.gouvernement.lu/en/communications-officielles.gouvernement%2Ben%2Bactualites%2Btoutes_actualites%2Bcommuniques%2B2020%2B03-mars%2B17-declaration-premier-chd.html">https://coronavirus.gouvernement.lu/en/communications-officielles.gouvernement%2Ben%2Bactualites%2Btoutes_actualites%2Bcommuniques%2B2020%2B03-mars%2B17-declaration-premier-chd.html</a>               |
|             | Work ban       | 2020-03-18 | <a href="http://www.legilux.lu/eli/etat/leg/rgd/2020/03/18/a165/jo">http://www.legilux.lu/eli/etat/leg/rgd/2020/03/18/a165/jo</a>                                                                                                                                                                                                                                                                       |
| Netherlands | Event ban      | 2020-03-12 | <a href="https://www.government.nl/latest/news/2020/03/12/new-measures-to-stop-spread-of-coronavirus-in-the-netherlands">https://www.government.nl/latest/news/2020/03/12/new-measures-to-stop-spread-of-coronavirus-in-the-netherlands</a>                                                                                                                                                             |
|             | Gathering ban  | 2020-03-23 | <a href="https://www.rijksoverheid.nl/actueel/nieuws/2020/03/24/aanvullende-maatregelen-23-maart">https://www.rijksoverheid.nl/actueel/nieuws/2020/03/24/aanvullende-maatregelen-23-maart</a>                                                                                                                                                                                                           |
|             | School closure | 2020-03-16 | <a href="https://www.government.nl/latest/news/2020/03/15/additional-measures-in-schools-the-hospitality-sector-and-sport">https://www.government.nl/latest/news/2020/03/15/additional-measures-in-schools-the-hospitality-sector-and-sport</a>                                                                                                                                                         |
|             | Venue closure  | 2020-03-16 | <a href="https://www.government.nl/latest/news/2020/03/15/additional-measures-in-schools-the-hospitality-sector-and-sport">https://www.government.nl/latest/news/2020/03/15/additional-measures-in-schools-the-hospitality-sector-and-sport</a>                                                                                                                                                         |
| Norway      | Event ban      | 2020-03-12 | <a href="https://www.fhi.no/nettpub/coronavirus/rad-og-informasjon-til-andre-sektorer-og-yrkesgrupper/anbefalinger-ved--store-arrangementer-knyttet-til-koronasmitte-i-norge/">https://www.fhi.no/nettpub/coronavirus/rad-og-informasjon-til-andre-sektorer-og-yrkesgrupper/anbefalinger-ved--store-arrangementer-knyttet-til-koronasmitte-i-norge/</a>                                                 |
|             | School closure | 2020-03-13 | <a href="https://www.regjeringen.no/en/aktuelt/coronavirus-measures-to-continue/id2694682/">https://www.regjeringen.no/en/aktuelt/coronavirus-measures-to-continue/id2694682/</a>                                                                                                                                                                                                                       |
|             | Border closure | 2020-03-16 | <a href="https://www.regjeringen.no/no/aktuelt/innforer-strengere-grensekontroll/id2693624/">https://www.regjeringen.no/no/aktuelt/innforer-strengere-grensekontroll/id2693624/</a>                                                                                                                                                                                                                     |
|             | Venue closure  | 2020-03-13 | <a href="https://www.regjeringen.no/en/aktuelt/coronavirus-measures-to-continue/id2694682/">https://www.regjeringen.no/en/aktuelt/coronavirus-measures-to-continue/id2694682/</a>                                                                                                                                                                                                                       |
| Portugal    | Event ban      | 2020-03-15 | <a href="https://dre.pt/web/guest/home/-/dre/130277342/details/maximized">https://dre.pt/web/guest/home/-/dre/130277342/details/maximized</a>                                                                                                                                                                                                                                                           |
|             | Gathering ban  | 2020-03-22 | <a href="https://dre.pt/web/guest/legislacao-consolidada/-/lc/130473378/202004042116/73800717/diploma/indice">https://dre.pt/web/guest/legislacao-consolidada/-/lc/130473378/202004042116/73800717/diploma/indice</a>                                                                                                                                                                                   |

|                |                |            |                                                                                                                                                                                                                                                                                                                                                                                                     |
|----------------|----------------|------------|-----------------------------------------------------------------------------------------------------------------------------------------------------------------------------------------------------------------------------------------------------------------------------------------------------------------------------------------------------------------------------------------------------|
|                | School closure | 2020-03-16 | <a href="https://www.portugal.gov.pt/pt/gc22/comunicacao/comunicado?i=suspensao-de-todas-as-atividades-letivas-e-nao-letivas-com-presenca-de-estudantes-em-todas-as-instituicoes-de-ensino-superior">https://www.portugal.gov.pt/pt/gc22/comunicacao/comunicado?i=suspensao-de-todas-as-atividades-letivas-e-nao-letivas-com-presenca-de-estudantes-em-todas-as-instituicoes-de-ensino-superior</a> |
|                | Venue closure  | 2020-03-22 | <a href="https://dre.pt/web/guest/legislacao-consolidada/-/lc/130473378/202004042116/73800717/diploma/indice">https://dre.pt/web/guest/legislacao-consolidada/-/lc/130473378/202004042116/73800717/diploma/indice</a>                                                                                                                                                                               |
|                | Lockdown       | 2020-03-22 | <a href="https://dre.pt/web/guest/legislacao-consolidada/-/lc/130473378/202004042116/73800717/diploma/indice">https://dre.pt/web/guest/legislacao-consolidada/-/lc/130473378/202004042116/73800717/diploma/indice</a>                                                                                                                                                                               |
| Spain          | Event ban      | 2020-03-13 | Date derived by aggregation, see Tab. 9                                                                                                                                                                                                                                                                                                                                                             |
|                | Gathering ban  | 2020-03-15 | Date derived by aggregation, see Tab. 9                                                                                                                                                                                                                                                                                                                                                             |
|                | School closure | 2020-03-16 | Date derived by aggregation, see Tab. 9                                                                                                                                                                                                                                                                                                                                                             |
|                | Border closure | 2020-03-17 | <a href="https://english.elpais.com/society/2020-03-16/spain-closes-its-borders-to-contain-coronavirus.html">https://english.elpais.com/society/2020-03-16/spain-closes-its-borders-to-contain-coronavirus.html</a>                                                                                                                                                                                 |
|                | Venue closure  | 2020-03-15 | Date derived by aggregation, see Tab. 9                                                                                                                                                                                                                                                                                                                                                             |
|                | Lockdown       | 2020-03-15 | Date derived by aggregation, see Tab. 9                                                                                                                                                                                                                                                                                                                                                             |
|                | Work ban       | 2020-03-30 | Date derived by aggregation, see Tab. 9                                                                                                                                                                                                                                                                                                                                                             |
| Sweden         | Event ban      | 2020-03-11 | <a href="https://www.government.se/articles/2020/03/ordinance-on-a-prohibition-against-holding-public-gatherings-and-events/">https://www.government.se/articles/2020/03/ordinance-on-a-prohibition-against-holding-public-gatherings-and-events/</a>                                                                                                                                               |
|                | Gathering ban  | 2020-03-27 | <a href="https://www.dailymail.co.uk/news/article-8160653/Sweden-bans-gatherings-50-people-threatens-people-six-month-jail-terms.html">https://www.dailymail.co.uk/news/article-8160653/Sweden-bans-gatherings-50-people-threatens-people-six-month-jail-terms.html</a>                                                                                                                             |
| Switzerland    | Event ban      | 2020-02-28 | <a href="https://www.admin.ch/gov/it/pagina-iniziale/documentazione/comunicati-stampa.msg-id-78289.html">https://www.admin.ch/gov/it/pagina-iniziale/documentazione/comunicati-stampa.msg-id-78289.html</a>                                                                                                                                                                                         |
|                | Gathering ban  | 2020-03-20 | <a href="https://www.admin.ch/gov/it/pagina-iniziale/documentazione/comunicati-stampa/comunicati-stampa-consiglio-federale.msg-id-78513.html">https://www.admin.ch/gov/it/pagina-iniziale/documentazione/comunicati-stampa/comunicati-stampa-consiglio-federale.msg-id-78513.html</a>                                                                                                               |
|                | School closure | 2020-03-16 | <a href="https://www.admin.ch/gov/it/pagina-iniziale/documentazione/comunicati-stampa/comunicati-stampa-consiglio-federale.html?dyn_startDate=01.01.2015">https://www.admin.ch/gov/it/pagina-iniziale/documentazione/comunicati-stampa/comunicati-stampa-consiglio-federale.html?dyn_startDate=01.01.2015</a>                                                                                       |
|                | Border closure | 2020-03-25 | <a href="https://www.bag.admin.ch/bag/it/home/krankheiten/ausbrueche-epidemien-pandemien/aktuelle-ausbrueche-epidemien/novel-cov/massnahmen-des-bundes.html">https://www.bag.admin.ch/bag/it/home/krankheiten/ausbrueche-epidemien-pandemien/aktuelle-ausbrueche-epidemien/novel-cov/massnahmen-des-bundes.html</a>                                                                                 |
|                | Venue closure  | 2020-03-17 | <a href="https://www.admin.ch/gov/it/pagina-iniziale/documentazione/comunicati-stampa/comunicati-stampa-consiglio-federale.html?dyn_startDate=01.01.2015">https://www.admin.ch/gov/it/pagina-iniziale/documentazione/comunicati-stampa/comunicati-stampa-consiglio-federale.html?dyn_startDate=01.01.2015</a>                                                                                       |
| United Kingdom | Event ban      | 2020-03-16 | <a href="https://www.gov.uk/guidance/covid-19-guidance-for-mass-gatherings">https://www.gov.uk/guidance/covid-19-guidance-for-mass-gatherings</a>                                                                                                                                                                                                                                                   |
|                | Gathering ban  | 2020-03-23 | <a href="https://www.gov.uk/government/speeches/pm-address-to-the-nation-on-coronavirus-23-march-2020">https://www.gov.uk/government/speeches/pm-address-to-the-nation-on-coronavirus-23-march-2020</a>                                                                                                                                                                                             |
|                | School closure | 2020-03-23 | <a href="https://www.gov.uk/government/speeches/pm-statement-on-coronavirus-22-march-2020">https://www.gov.uk/government/speeches/pm-statement-on-coronavirus-22-march-2020</a>                                                                                                                                                                                                                     |

|                          |                |            |                                                                                                                                                                                                             |
|--------------------------|----------------|------------|-------------------------------------------------------------------------------------------------------------------------------------------------------------------------------------------------------------|
| United States of America | Venue closure  | 2020-03-20 | <a href="https://www.wsj.com/articles/u-k-escalates-measures-to-fight-coronavirus-11584741690">https://www.wsj.com/articles/u-k-escalates-measures-to-fight-coronavirus-11584741690</a>                     |
|                          | Lockdown       | 2020-03-23 | <a href="https://www.gov.uk/government/speeches/pm-address-to-the-nation-on-coronavirus-23-march-2020">https://www.gov.uk/government/speeches/pm-address-to-the-nation-on-coronavirus-23-march-2020</a>     |
|                          | Event ban      | 2020-03-16 | Date derived by aggregation, see Tab. 7                                                                                                                                                                     |
|                          | Gathering ban  | 2020-03-16 | Date derived by aggregation, see Tab. 7                                                                                                                                                                     |
|                          | School closure | 2020-03-18 | Date derived by aggregation, see Tab. 7                                                                                                                                                                     |
|                          | Border closure | 2020-03-13 | <a href="https://www.theguardian.com/world/2020/mar/11/coronavirus-outbreak-us-trump-latest#maincontent">https://www.theguardian.com/world/2020/mar/11/coronavirus-outbreak-us-trump-latest#maincontent</a> |
|                          | Venue closure  | 2020-03-27 | Date derived by aggregation, see Tab. 7                                                                                                                                                                     |
|                          | Lockdown       | 2020-04-04 | Date derived by aggregation, see Tab. 7                                                                                                                                                                     |
|                          | Work ban       | 2020-03-27 | Date derived by aggregation, see Tab. 7                                                                                                                                                                     |

Table 6: Sources for policies in Switzerland, Austria, Belgium, Denmark, Finland, France, United Kingdom, Greece, Ireland, Luxembourg, Netherlands, Norway, Portugal, Sweden, United States of America, Germany, Italy, Spain, Canada, and Australia

| <b>NPI</b> | <b>Date</b> | <b># Effective</b> | <b>Region</b>        | <b>Source</b>                                                                                                                                                                                                                                                                                                                                                                                                                                                                                                                                                                                     |
|------------|-------------|--------------------|----------------------|---------------------------------------------------------------------------------------------------------------------------------------------------------------------------------------------------------------------------------------------------------------------------------------------------------------------------------------------------------------------------------------------------------------------------------------------------------------------------------------------------------------------------------------------------------------------------------------------------|
| Event ban  | 2020-03-11  | 3 out of 51        | District of Columbia | <a href="https://wjla.com/news/coronavirus/dc-health-postponing-cancelling-events-1000-people-through-march">https://wjla.com/news/coronavirus/dc-health-postponing-cancelling-events-1000-people-through-march</a>                                                                                                                                                                                                                                                                                                                                                                               |
| Event ban  | 2020-03-11  | 3 out of 51        | Kentucky             | <a href="https://governor.ky.gov/covid19">https://governor.ky.gov/covid19</a>                                                                                                                                                                                                                                                                                                                                                                                                                                                                                                                     |
| Event ban  | 2020-03-11  | 3 out of 51        | Rhode Island         | <a href="https://www.ri.gov/press/view/37892">https://www.ri.gov/press/view/37892</a>                                                                                                                                                                                                                                                                                                                                                                                                                                                                                                             |
| Event ban  | 2020-03-12  | 18 out of 51       | California           | <a href="https://thehill.com/policy/healthcare/487179-california-governor-calls-for-cancellations-of-large-events">https://thehill.com/policy/healthcare/487179-california-governor-calls-for-cancellations-of-large-events</a>                                                                                                                                                                                                                                                                                                                                                                   |
| Event ban  | 2020-03-12  | 18 out of 51       | Connecticut          | <a href="https://portal.ct.gov/-/media/Office-of-the-Governor/Executive-Orders/Lamont-Executive-Orders/Executive-Order-No-7.pdf?la=en">https://portal.ct.gov/-/media/Office-of-the-Governor/Executive-Orders/Lamont-Executive-Orders/Executive-Order-No-7.pdf?la=en</a>                                                                                                                                                                                                                                                                                                                           |
| Event ban  | 2020-03-12  | 18 out of 51       | Florida              | <a href="https://www.miamiherald.com/news/local/community/miami-dade/article241133076.html">https://www.miamiherald.com/news/local/community/miami-dade/article241133076.html</a>                                                                                                                                                                                                                                                                                                                                                                                                                 |
| Event ban  | 2020-03-12  | 18 out of 51       | Indiana              | <a href="https://www.cdc.gov/coronavirus/2019-ncov/community/large-events/mass-gatherings-ready-for-covid-19.html">https://www.cdc.gov/coronavirus/2019-ncov/community/large-events/mass-gatherings-ready-for-covid-19.html</a>                                                                                                                                                                                                                                                                                                                                                                   |
| Event ban  | 2020-03-12  | 18 out of 51       | Maryland             | <a href="https://governor.maryland.gov/2020/03/12/governor-hogan-announces-major-actions-to-protect-public-health-limit-spread-of-covid-19-pandemic/">https://governor.maryland.gov/2020/03/12/governor-hogan-announces-major-actions-to-protect-public-health-limit-spread-of-covid-19-pandemic/</a>                                                                                                                                                                                                                                                                                             |
| Event ban  | 2020-03-12  | 18 out of 51       | Mississippi          | <a href="https://www.coronavirus.ms.gov/2019-11/msdh-has-issued-enhanced-protective-recommendations">https://www.coronavirus.ms.gov/2019-11/msdh-has-issued-enhanced-protective-recommendations</a>                                                                                                                                                                                                                                                                                                                                                                                               |
| Event ban  | 2020-03-12  | 18 out of 51       | New Jersey           | <a href="https://www.nj.gov/governor/news/news/562020/approved/20200312a.shtml">https://www.nj.gov/governor/news/news/562020/approved/20200312a.shtml</a>                                                                                                                                                                                                                                                                                                                                                                                                                                         |
| Event ban  | 2020-03-12  | 18 out of 51       | New Mexico           | <a href="https://www.governor.state.nm.us/2020/03/12/health-secretary-issues-public-health-order-suspending-mass-gatherings-in-new-mexico/">https://www.governor.state.nm.us/2020/03/12/health-secretary-issues-public-health-order-suspending-mass-gatherings-in-new-mexico/</a>                                                                                                                                                                                                                                                                                                                 |
| Event ban  | 2020-03-12  | 18 out of 51       | New York             | <a href="https://www.governor.ny.gov/news/no-2021-continuing-temporary-suspension-and-modification-laws-relating-disaster-emergency">https://www.governor.ny.gov/news/no-2021-continuing-temporary-suspension-and-modification-laws-relating-disaster-emergency</a>                                                                                                                                                                                                                                                                                                                               |
| Event ban  | 2020-03-12  | 18 out of 51       | Ohio                 | <a href="https://coronavirus.ohio.gov/wps/wcm/connect/gov/b815ab52-a571-4e65-9077-32468779671a/ODH+Order+to+Limit+and+Prohibit+Mass+Gatherings%2C+3.12.20.pdf?MOD=AJPERES&amp;CONVERT_T0=url&amp;CACHEID=ROOTWORKSPACE.Z18_M1HGGIKON0J000Q09DDDDM3000-b815ab52-a571-4e65-9077-32468779671a-n5828iN">https://coronavirus.ohio.gov/wps/wcm/connect/gov/b815ab52-a571-4e65-9077-32468779671a/ODH+Order+to+Limit+and+Prohibit+Mass+Gatherings%2C+3.12.20.pdf?MOD=AJPERES&amp;CONVERT_T0=url&amp;CACHEID=ROOTWORKSPACE.Z18_M1HGGIKON0J000Q09DDDDM3000-b815ab52-a571-4e65-9077-32468779671a-n5828iN</a> |
| Event ban  | 2020-03-12  | 18 out of 51       | Oregon               | <a href="https://www.oregon.gov/osp/programs/sfm/Pages/Event_Cancellations.aspx">https://www.oregon.gov/osp/programs/sfm/Pages/Event_Cancellations.aspx</a>                                                                                                                                                                                                                                                                                                                                                                                                                                       |
| Event ban  | 2020-03-12  | 18 out of 51       | Pennsylvania         | <a href="https://lancasteronline.com/news/health/gov-tom-wolf-cancel-large-events-with-more-than-250-people/article_1a6f027c-648e-11ea-aa2f-c787d0825889.html">https://lancasteronline.com/news/health/gov-tom-wolf-cancel-large-events-with-more-than-250-people/article_1a6f027c-648e-11ea-aa2f-c787d0825889.html</a>                                                                                                                                                                                                                                                                           |
| Event ban  | 2020-03-12  | 18 out of 51       | Utah                 | <a href="https://kutv.com/news/local/live-blog-closures-event-cancellations-more-in-utah-due-to-coronavirus">https://kutv.com/news/local/live-blog-closures-event-cancellations-more-in-utah-due-to-coronavirus</a>                                                                                                                                                                                                                                                                                                                                                                               |
| Event ban  | 2020-03-12  | 18 out of 51       | Virginia             | <a href="https://www.governor.virginia.gov/newsroom/all-releases/2020/march/headline-853537-en.html">https://www.governor.virginia.gov/newsroom/all-releases/2020/march/headline-853537-en.html</a>                                                                                                                                                                                                                                                                                                                                                                                               |

|                                                                   |            |              |                |                                                                                                                                                                                                                                                                                                                                                                                             |
|-------------------------------------------------------------------|------------|--------------|----------------|---------------------------------------------------------------------------------------------------------------------------------------------------------------------------------------------------------------------------------------------------------------------------------------------------------------------------------------------------------------------------------------------|
| Event ban                                                         | 2020-03-12 | 18 out of 51 | West Virginia  | <a href="https://governor.wv.gov/News/press-releases/2020/Pages/COVID-UPDATE-Gov.-Justice-announces-State-employee-travel-ban,-basketball-tournament-cancellation-among-latest-precautions.aspx">https://governor.wv.gov/News/press-releases/2020/Pages/COVID-UPDATE-Gov.-Justice-announces-State-employee-travel-ban,-basketball-tournament-cancellation-among-latest-precautions.aspx</a> |
| Event ban                                                         | 2020-03-13 | 25 out of 51 | Arizona        | <a href="https://www.fox10phoenix.com/news/arizona-governor-says-schools-mass-gatherings-events-of-50-or-more-canceled-amid-covid-19-spread">https://www.fox10phoenix.com/news/arizona-governor-says-schools-mass-gatherings-events-of-50-or-more-canceled-amid-covid-19-spread</a>                                                                                                         |
| Event ban                                                         | 2020-03-13 | 25 out of 51 | Louisiana      | <a href="https://gov.louisiana.gov/index.cfm/communication/viewcampaign/2548?uid=hgdtfgl%3Dn7&amp;nowrap=1">https://gov.louisiana.gov/index.cfm/communication/viewcampaign/2548?uid=hgdtfgl%3Dn7&amp;nowrap=1</a>                                                                                                                                                                           |
| Event ban                                                         | 2020-03-13 | 25 out of 51 | Massachusetts  | <a href="https://www.mass.gov/news/governor-baker-issues-order-limiting-large-gatherings-in-the-commonwealth">https://www.mass.gov/news/governor-baker-issues-order-limiting-large-gatherings-in-the-commonwealth</a>                                                                                                                                                                       |
| Event ban                                                         | 2020-03-13 | 25 out of 51 | Michigan       | <a href="https://www.michigan.gov/whitmer/0,9309,7-387-90499_90705-521595--,00.html">https://www.michigan.gov/whitmer/0,9309,7-387-90499_90705-521595--,00.html</a>                                                                                                                                                                                                                         |
| Event ban                                                         | 2020-03-13 | 25 out of 51 | Minnesota      | <a href="https://apnews.com/24d6d0c93ded9e8a5c2712df0a045854">https://apnews.com/24d6d0c93ded9e8a5c2712df0a045854</a>                                                                                                                                                                                                                                                                       |
| Event ban                                                         | 2020-03-13 | 25 out of 51 | Tennessee      | <a href="https://www.tn.gov/governor/news/2020/3/13/governor-lee-issues-guidance-for-mass-gatherings--schools-and-state-workforce.html">https://www.tn.gov/governor/news/2020/3/13/governor-lee-issues-guidance-for-mass-gatherings--schools-and-state-workforce.html</a>                                                                                                                   |
| Event ban                                                         | 2020-03-13 | 25 out of 51 | Washington     | <a href="https://www.governor.wa.gov/news-media/inslee-announces-statewide-school-closures-expansion-limits-large-gatherings">https://www.governor.wa.gov/news-media/inslee-announces-statewide-school-closures-expansion-limits-large-gatherings</a>                                                                                                                                       |
| Event ban                                                         | 2020-03-14 | 26 out of 51 | North Carolina | <a href="https://files.nc.gov/governor/documents/files/E0117-COVID-19-Prohibiting-Mass-Gathering-and-K12-School-Closure.pdf">https://files.nc.gov/governor/documents/files/E0117-COVID-19-Prohibiting-Mass-Gathering-and-K12-School-Closure.pdf</a>                                                                                                                                         |
| -----                                                             |            |              |                |                                                                                                                                                                                                                                                                                                                                                                                             |
| <i>NPI implemented in two thirds of the regions by 2020-03-16</i> |            |              |                |                                                                                                                                                                                                                                                                                                                                                                                             |
| Event ban                                                         | 2020-03-16 | 51 out of 51 | Alabama        | <a href="https://eu.usatoday.com/story/news/health/2020/03/16/coronavirus-live-updates-us-death-toll-rises-cases-testing/5053816002/">https://eu.usatoday.com/story/news/health/2020/03/16/coronavirus-live-updates-us-death-toll-rises-cases-testing/5053816002/</a>                                                                                                                       |
| Event ban                                                         | 2020-03-16 | 51 out of 51 | Alaska         | <a href="https://eu.usatoday.com/story/news/health/2020/03/16/coronavirus-live-updates-us-death-toll-rises-cases-testing/5053816002/">https://eu.usatoday.com/story/news/health/2020/03/16/coronavirus-live-updates-us-death-toll-rises-cases-testing/5053816002/</a>                                                                                                                       |
| Event ban                                                         | 2020-03-16 | 51 out of 51 | Arkansas       | <a href="https://eu.usatoday.com/story/news/health/2020/03/16/coronavirus-live-updates-us-death-toll-rises-cases-testing/5053816002/">https://eu.usatoday.com/story/news/health/2020/03/16/coronavirus-live-updates-us-death-toll-rises-cases-testing/5053816002/</a>                                                                                                                       |
| Event ban                                                         | 2020-03-16 | 51 out of 51 | Colorado       | <a href="https://northglenn-thorntonsentinel.com/stories/colorado-events-of-50-people-no-sit-down-restaurants-bars,296332">https://northglenn-thorntonsentinel.com/stories/colorado-events-of-50-people-no-sit-down-restaurants-bars,296332</a>                                                                                                                                             |
| Event ban                                                         | 2020-03-16 | 51 out of 51 | Delaware       | <a href="https://eu.usatoday.com/story/news/health/2020/03/16/coronavirus-live-updates-us-death-toll-rises-cases-testing/5053816002/">https://eu.usatoday.com/story/news/health/2020/03/16/coronavirus-live-updates-us-death-toll-rises-cases-testing/5053816002/</a>                                                                                                                       |
| Event ban                                                         | 2020-03-16 | 51 out of 51 | Georgia        | <a href="https://eu.usatoday.com/story/news/health/2020/03/16/coronavirus-live-updates-us-death-toll-rises-cases-testing/5053816002/">https://eu.usatoday.com/story/news/health/2020/03/16/coronavirus-live-updates-us-death-toll-rises-cases-testing/5053816002/</a>                                                                                                                       |
| Event ban                                                         | 2020-03-16 | 51 out of 51 | Hawaii         | <a href="https://eu.usatoday.com/story/news/health/2020/03/16/coronavirus-live-updates-us-death-toll-rises-cases-testing/5053816002/">https://eu.usatoday.com/story/news/health/2020/03/16/coronavirus-live-updates-us-death-toll-rises-cases-testing/5053816002/</a>                                                                                                                       |
| Event ban                                                         | 2020-03-16 | 51 out of 51 | Idaho          | <a href="https://eu.usatoday.com/story/news/health/2020/03/16/coronavirus-live-updates-us-death-toll-rises-cases-testing/5053816002/">https://eu.usatoday.com/story/news/health/2020/03/16/coronavirus-live-updates-us-death-toll-rises-cases-testing/5053816002/</a>                                                                                                                       |

| Event ban     | 2020-03-16  | 51 out of 51       | Illinois       | <a href="https://herald-review.com/news/state-and-regional/govt-and-politics/monday-update-pritzker-bans-gatherings-of-50-or-more-12-new-illinois-cases-announced/article_c5fa6e55-70f4-583b-aea9-09ce2315eb16.html">https://herald-review.com/news/state-and-regional/govt-and-politics/monday-update-pritzker-bans-gatherings-of-50-or-more-12-new-illinois-cases-announced/article_c5fa6e55-70f4-583b-aea9-09ce2315eb16.html</a> |
|---------------|-------------|--------------------|----------------|-------------------------------------------------------------------------------------------------------------------------------------------------------------------------------------------------------------------------------------------------------------------------------------------------------------------------------------------------------------------------------------------------------------------------------------|
| Event ban     | 2020-03-16  | 51 out of 51       | Iowa           | <a href="https://eu.usatoday.com/story/news/health/2020/03/16/coronavirus-live-updates-us-death-toll-rises-cases-testing/5053816002/">https://eu.usatoday.com/story/news/health/2020/03/16/coronavirus-live-updates-us-death-toll-rises-cases-testing/5053816002/</a>                                                                                                                                                               |
| Event ban     | 2020-03-16  | 51 out of 51       | Kansas         | <a href="https://govstatus.egov.com/coronavirus">https://govstatus.egov.com/coronavirus</a>                                                                                                                                                                                                                                                                                                                                         |
| Event ban     | 2020-03-16  | 51 out of 51       | Maine          | <a href="https://eu.usatoday.com/story/news/health/2020/03/16/coronavirus-live-updates-us-death-toll-rises-cases-testing/5053816002/">https://eu.usatoday.com/story/news/health/2020/03/16/coronavirus-live-updates-us-death-toll-rises-cases-testing/5053816002/</a>                                                                                                                                                               |
| Event ban     | 2020-03-16  | 51 out of 51       | Missouri       | <a href="https://governor.mo.gov/press-releases/archive/governor-parsons-statement-regarding-cdc-recommendations-mass-gatherings-and">https://governor.mo.gov/press-releases/archive/governor-parsons-statement-regarding-cdc-recommendations-mass-gatherings-and</a>                                                                                                                                                               |
| Event ban     | 2020-03-16  | 51 out of 51       | Montana        | <a href="https://eu.usatoday.com/story/news/health/2020/03/16/coronavirus-live-updates-us-death-toll-rises-cases-testing/5053816002/">https://eu.usatoday.com/story/news/health/2020/03/16/coronavirus-live-updates-us-death-toll-rises-cases-testing/5053816002/</a>                                                                                                                                                               |
| Event ban     | 2020-03-16  | 51 out of 51       | Nebraska       | <a href="https://eu.usatoday.com/story/news/health/2020/03/16/coronavirus-live-updates-us-death-toll-rises-cases-testing/5053816002/">https://eu.usatoday.com/story/news/health/2020/03/16/coronavirus-live-updates-us-death-toll-rises-cases-testing/5053816002/</a>                                                                                                                                                               |
| Event ban     | 2020-03-16  | 51 out of 51       | Nevada         | <a href="https://eu.usatoday.com/story/news/health/2020/03/16/coronavirus-live-updates-us-death-toll-rises-cases-testing/5053816002/">https://eu.usatoday.com/story/news/health/2020/03/16/coronavirus-live-updates-us-death-toll-rises-cases-testing/5053816002/</a>                                                                                                                                                               |
| Event ban     | 2020-03-16  | 51 out of 51       | New Hampshire  | <a href="https://www.governor.nh.gov/news-media/press-2020/20200316-covid-10-businesses.htm">https://www.governor.nh.gov/news-media/press-2020/20200316-covid-10-businesses.htm</a>                                                                                                                                                                                                                                                 |
| Event ban     | 2020-03-16  | 51 out of 51       | North Dakota   | <a href="https://eu.usatoday.com/story/news/health/2020/03/16/coronavirus-live-updates-us-death-toll-rises-cases-testing/5053816002/">https://eu.usatoday.com/story/news/health/2020/03/16/coronavirus-live-updates-us-death-toll-rises-cases-testing/5053816002/</a>                                                                                                                                                               |
| Event ban     | 2020-03-16  | 51 out of 51       | Oklahoma       | <a href="https://eu.usatoday.com/story/news/health/2020/03/16/coronavirus-live-updates-us-death-toll-rises-cases-testing/5053816002/">https://eu.usatoday.com/story/news/health/2020/03/16/coronavirus-live-updates-us-death-toll-rises-cases-testing/5053816002/</a>                                                                                                                                                               |
| Event ban     | 2020-03-16  | 51 out of 51       | South Carolina | <a href="https://eu.usatoday.com/story/news/health/2020/03/16/coronavirus-live-updates-us-death-toll-rises-cases-testing/5053816002/">https://eu.usatoday.com/story/news/health/2020/03/16/coronavirus-live-updates-us-death-toll-rises-cases-testing/5053816002/</a>                                                                                                                                                               |
| Event ban     | 2020-03-16  | 51 out of 51       | South Dakota   | <a href="https://eu.usatoday.com/story/news/health/2020/03/16/coronavirus-live-updates-us-death-toll-rises-cases-testing/5053816002/">https://eu.usatoday.com/story/news/health/2020/03/16/coronavirus-live-updates-us-death-toll-rises-cases-testing/5053816002/</a>                                                                                                                                                               |
| Event ban     | 2020-03-16  | 51 out of 51       | Texas          | <a href="https://eu.usatoday.com/story/news/health/2020/03/16/coronavirus-live-updates-us-death-toll-rises-cases-testing/5053816002/">https://eu.usatoday.com/story/news/health/2020/03/16/coronavirus-live-updates-us-death-toll-rises-cases-testing/5053816002/</a>                                                                                                                                                               |
| Event ban     | 2020-03-16  | 51 out of 51       | Vermont        | <a href="https://eu.usatoday.com/story/news/health/2020/03/16/coronavirus-live-updates-us-death-toll-rises-cases-testing/5053816002/">https://eu.usatoday.com/story/news/health/2020/03/16/coronavirus-live-updates-us-death-toll-rises-cases-testing/5053816002/</a>                                                                                                                                                               |
| Event ban     | 2020-03-16  | 51 out of 51       | Wisconsin      | <a href="https://content.govdelivery.com/accounts/WIGOV/bulletins/2817964">https://content.govdelivery.com/accounts/WIGOV/bulletins/2817964</a>                                                                                                                                                                                                                                                                                     |
| Event ban     | 2020-03-16  | 51 out of 51       | Wyoming        | <a href="https://eu.usatoday.com/story/news/health/2020/03/16/coronavirus-live-updates-us-death-toll-rises-cases-testing/5053816002/">https://eu.usatoday.com/story/news/health/2020/03/16/coronavirus-live-updates-us-death-toll-rises-cases-testing/5053816002/</a>                                                                                                                                                               |
| <b>NPI</b>    | <b>Date</b> | <b># Effective</b> | <b>Region</b>  | <b>Source</b>                                                                                                                                                                                                                                                                                                                                                                                                                       |
| Gathering ban | 2020-03-11  | 1 out of 51        | Kentucky       | <a href="https://governor.ky.gov/covid19">https://governor.ky.gov/covid19</a>                                                                                                                                                                                                                                                                                                                                                       |

|                                                                   |            |              |                      |                                                                                                                                                                                                                                                                                     |
|-------------------------------------------------------------------|------------|--------------|----------------------|-------------------------------------------------------------------------------------------------------------------------------------------------------------------------------------------------------------------------------------------------------------------------------------|
| Gathering ban                                                     | 2020-03-13 | 2 out of 51  | Arizona              | <a href="https://www.fox10phoenix.com/news/arizona-governor-says-schools-mass-gatherings-events-of-50-or-more-canceled-amid-covid-19-spread">https://www.fox10phoenix.com/news/arizona-governor-says-schools-mass-gatherings-events-of-50-or-more-canceled-amid-covid-19-spread</a> |
| <i>NPI implemented in two thirds of the regions by 2020-03-16</i> |            |              |                      |                                                                                                                                                                                                                                                                                     |
| Gathering ban                                                     | 2020-03-16 | 51 out of 51 | Alabama              | <a href="https://governor.alabama.gov/assets/2020/03/Amended-Statewide-Social-Distancing-SHO-Order-3.27.2020-FINAL.pdf">https://governor.alabama.gov/assets/2020/03/Amended-Statewide-Social-Distancing-SHO-Order-3.27.2020-FINAL.pdf</a>                                           |
| Gathering ban                                                     | 2020-03-16 | 51 out of 51 | Alaska               | <a href="https://eu.usatoday.com/story/news/health/2020/03/16/coronavirus-live-updates-us-death-toll-rises-cases-testing/5053816002/">https://eu.usatoday.com/story/news/health/2020/03/16/coronavirus-live-updates-us-death-toll-rises-cases-testing/5053816002/</a>               |
| Gathering ban                                                     | 2020-03-16 | 51 out of 51 | Arkansas             | <a href="https://eu.usatoday.com/story/news/health/2020/03/16/coronavirus-live-updates-us-death-toll-rises-cases-testing/5053816002/">https://eu.usatoday.com/story/news/health/2020/03/16/coronavirus-live-updates-us-death-toll-rises-cases-testing/5053816002/</a>               |
| Gathering ban                                                     | 2020-03-16 | 51 out of 51 | California           | <a href="https://eu.usatoday.com/story/news/health/2020/03/16/coronavirus-live-updates-us-death-toll-rises-cases-testing/5053816002/">https://eu.usatoday.com/story/news/health/2020/03/16/coronavirus-live-updates-us-death-toll-rises-cases-testing/5053816002/</a>               |
| Gathering ban                                                     | 2020-03-16 | 51 out of 51 | Colorado             | <a href="https://northglenn-thorntonsentinel.com/stories/colorado-events-of-50-people-no-sit-down-restaurants-bars,296332">https://northglenn-thorntonsentinel.com/stories/colorado-events-of-50-people-no-sit-down-restaurants-bars,296332</a>                                     |
| Gathering ban                                                     | 2020-03-16 | 51 out of 51 | Connecticut          | <a href="https://eu.usatoday.com/story/news/health/2020/03/16/coronavirus-live-updates-us-death-toll-rises-cases-testing/5053816002/">https://eu.usatoday.com/story/news/health/2020/03/16/coronavirus-live-updates-us-death-toll-rises-cases-testing/5053816002/</a>               |
| Gathering ban                                                     | 2020-03-16 | 51 out of 51 | Delaware             | <a href="https://eu.usatoday.com/story/news/health/2020/03/16/coronavirus-live-updates-us-death-toll-rises-cases-testing/5053816002/">https://eu.usatoday.com/story/news/health/2020/03/16/coronavirus-live-updates-us-death-toll-rises-cases-testing/5053816002/</a>               |
| Gathering ban                                                     | 2020-03-16 | 51 out of 51 | District of Columbia | <a href="https://dc.gov/release/mayor\OT1\textquoterights-order-2020-048-prohibition-mass-gatherings-during-public-health-emergency">https://dc.gov/release/mayor\OT1\textquoterights-order-2020-048-prohibition-mass-gatherings-during-public-health-emergency</a>                 |
| Gathering ban                                                     | 2020-03-16 | 51 out of 51 | Florida              | <a href="https://eu.usatoday.com/story/news/health/2020/03/16/coronavirus-live-updates-us-death-toll-rises-cases-testing/5053816002/">https://eu.usatoday.com/story/news/health/2020/03/16/coronavirus-live-updates-us-death-toll-rises-cases-testing/5053816002/</a>               |
| Gathering ban                                                     | 2020-03-16 | 51 out of 51 | Georgia              | <a href="https://eu.usatoday.com/story/news/health/2020/03/16/coronavirus-live-updates-us-death-toll-rises-cases-testing/5053816002/">https://eu.usatoday.com/story/news/health/2020/03/16/coronavirus-live-updates-us-death-toll-rises-cases-testing/5053816002/</a>               |
| Gathering ban                                                     | 2020-03-16 | 51 out of 51 | Hawaii               | <a href="https://eu.usatoday.com/story/news/health/2020/03/16/coronavirus-live-updates-us-death-toll-rises-cases-testing/5053816002/">https://eu.usatoday.com/story/news/health/2020/03/16/coronavirus-live-updates-us-death-toll-rises-cases-testing/5053816002/</a>               |
| Gathering ban                                                     | 2020-03-16 | 51 out of 51 | Idaho                | <a href="https://eu.usatoday.com/story/news/health/2020/03/16/coronavirus-live-updates-us-death-toll-rises-cases-testing/5053816002/">https://eu.usatoday.com/story/news/health/2020/03/16/coronavirus-live-updates-us-death-toll-rises-cases-testing/5053816002/</a>               |
| Gathering ban                                                     | 2020-03-16 | 51 out of 51 | Illinois             | <a href="https://eu.usatoday.com/story/news/health/2020/03/16/coronavirus-live-updates-us-death-toll-rises-cases-testing/5053816002/">https://eu.usatoday.com/story/news/health/2020/03/16/coronavirus-live-updates-us-death-toll-rises-cases-testing/5053816002/</a>               |
| Gathering ban                                                     | 2020-03-16 | 51 out of 51 | Indiana              | <a href="https://eu.usatoday.com/story/news/health/2020/03/16/coronavirus-live-updates-us-death-toll-rises-cases-testing/5053816002/">https://eu.usatoday.com/story/news/health/2020/03/16/coronavirus-live-updates-us-death-toll-rises-cases-testing/5053816002/</a>               |
| Gathering ban                                                     | 2020-03-16 | 51 out of 51 | Iowa                 | <a href="https://eu.usatoday.com/story/news/health/2020/03/16/coronavirus-live-updates-us-death-toll-rises-cases-testing/5053816002/">https://eu.usatoday.com/story/news/health/2020/03/16/coronavirus-live-updates-us-death-toll-rises-cases-testing/5053816002/</a>               |
| Gathering ban                                                     | 2020-03-16 | 51 out of 51 | Kansas               | <a href="https://govstatus.egov.com/coronavirus">https://govstatus.egov.com/coronavirus</a>                                                                                                                                                                                         |
| Gathering ban                                                     | 2020-03-16 | 51 out of 51 | Louisiana            | <a href="https://eu.usatoday.com/story/news/health/2020/03/16/coronavirus-live-updates-us-death-toll-rises-cases-testing/5053816002/">https://eu.usatoday.com/story/news/health/2020/03/16/coronavirus-live-updates-us-death-toll-rises-cases-testing/5053816002/</a>               |



|               |            |              |                |                                                                                                                                                                                                                                                                       |
|---------------|------------|--------------|----------------|-----------------------------------------------------------------------------------------------------------------------------------------------------------------------------------------------------------------------------------------------------------------------|
| Gathering ban | 2020-03-16 | 51 out of 51 | Maine          | <a href="https://eu.usatoday.com/story/news/health/2020/03/16/coronavirus-live-updates-us-death-toll-rises-cases-testing/5053816002/">https://eu.usatoday.com/story/news/health/2020/03/16/coronavirus-live-updates-us-death-toll-rises-cases-testing/5053816002/</a> |
| Gathering ban | 2020-03-16 | 51 out of 51 | Maryland       | <a href="https://eu.usatoday.com/story/news/health/2020/03/16/coronavirus-live-updates-us-death-toll-rises-cases-testing/5053816002/">https://eu.usatoday.com/story/news/health/2020/03/16/coronavirus-live-updates-us-death-toll-rises-cases-testing/5053816002/</a> |
| Gathering ban | 2020-03-16 | 51 out of 51 | Massachusetts  | <a href="https://eu.usatoday.com/story/news/health/2020/03/16/coronavirus-live-updates-us-death-toll-rises-cases-testing/5053816002/">https://eu.usatoday.com/story/news/health/2020/03/16/coronavirus-live-updates-us-death-toll-rises-cases-testing/5053816002/</a> |
| Gathering ban | 2020-03-16 | 51 out of 51 | Michigan       | <a href="https://www.michigan.gov/whitmer/0,9309,7-387-90499_90705-521890--,00.html">https://www.michigan.gov/whitmer/0,9309,7-387-90499_90705-521890--,00.html</a>                                                                                                   |
| Gathering ban | 2020-03-16 | 51 out of 51 | Minnesota      | <a href="https://eu.usatoday.com/story/news/health/2020/03/16/coronavirus-live-updates-us-death-toll-rises-cases-testing/5053816002/">https://eu.usatoday.com/story/news/health/2020/03/16/coronavirus-live-updates-us-death-toll-rises-cases-testing/5053816002/</a> |
| Gathering ban | 2020-03-16 | 51 out of 51 | Mississippi    | <a href="https://eu.usatoday.com/story/news/health/2020/03/16/coronavirus-live-updates-us-death-toll-rises-cases-testing/5053816002/">https://eu.usatoday.com/story/news/health/2020/03/16/coronavirus-live-updates-us-death-toll-rises-cases-testing/5053816002/</a> |
| Gathering ban | 2020-03-16 | 51 out of 51 | Missouri       | <a href="https://eu.usatoday.com/story/news/health/2020/03/16/coronavirus-live-updates-us-death-toll-rises-cases-testing/5053816002/">https://eu.usatoday.com/story/news/health/2020/03/16/coronavirus-live-updates-us-death-toll-rises-cases-testing/5053816002/</a> |
| Gathering ban | 2020-03-16 | 51 out of 51 | Montana        | <a href="https://eu.usatoday.com/story/news/health/2020/03/16/coronavirus-live-updates-us-death-toll-rises-cases-testing/5053816002/">https://eu.usatoday.com/story/news/health/2020/03/16/coronavirus-live-updates-us-death-toll-rises-cases-testing/5053816002/</a> |
| Gathering ban | 2020-03-16 | 51 out of 51 | Nebraska       | <a href="https://eu.usatoday.com/story/news/health/2020/03/16/coronavirus-live-updates-us-death-toll-rises-cases-testing/5053816002/">https://eu.usatoday.com/story/news/health/2020/03/16/coronavirus-live-updates-us-death-toll-rises-cases-testing/5053816002/</a> |
| Gathering ban | 2020-03-16 | 51 out of 51 | Nevada         | <a href="https://eu.usatoday.com/story/news/health/2020/03/16/coronavirus-live-updates-us-death-toll-rises-cases-testing/5053816002/">https://eu.usatoday.com/story/news/health/2020/03/16/coronavirus-live-updates-us-death-toll-rises-cases-testing/5053816002/</a> |
| Gathering ban | 2020-03-16 | 51 out of 51 | New Hampshire  | <a href="https://www.governor.nh.gov/news-media/press-2020/20200316-covid-10-businesses.htm">https://www.governor.nh.gov/news-media/press-2020/20200316-covid-10-businesses.htm</a>                                                                                   |
| Gathering ban | 2020-03-16 | 51 out of 51 | New Jersey     | <a href="https://www.governor.nh.gov/news-media/press-2020/20200315-emergency-order-1.html">https://www.governor.nh.gov/news-media/press-2020/20200315-emergency-order-1.html</a>                                                                                     |
| Gathering ban | 2020-03-16 | 51 out of 51 | New Mexico     | <a href="https://eu.usatoday.com/story/news/health/2020/03/16/coronavirus-live-updates-us-death-toll-rises-cases-testing/5053816002/">https://eu.usatoday.com/story/news/health/2020/03/16/coronavirus-live-updates-us-death-toll-rises-cases-testing/5053816002/</a> |
| Gathering ban | 2020-03-16 | 51 out of 51 | New York       | <a href="https://eu.usatoday.com/story/news/health/2020/03/16/coronavirus-live-updates-us-death-toll-rises-cases-testing/5053816002/">https://eu.usatoday.com/story/news/health/2020/03/16/coronavirus-live-updates-us-death-toll-rises-cases-testing/5053816002/</a> |
| Gathering ban | 2020-03-16 | 51 out of 51 | North Carolina | <a href="https://eu.usatoday.com/story/news/health/2020/03/16/coronavirus-live-updates-us-death-toll-rises-cases-testing/5053816002/">https://eu.usatoday.com/story/news/health/2020/03/16/coronavirus-live-updates-us-death-toll-rises-cases-testing/5053816002/</a> |
| Gathering ban | 2020-03-16 | 51 out of 51 | North Dakota   | <a href="https://eu.usatoday.com/story/news/health/2020/03/16/coronavirus-live-updates-us-death-toll-rises-cases-testing/5053816002/">https://eu.usatoday.com/story/news/health/2020/03/16/coronavirus-live-updates-us-death-toll-rises-cases-testing/5053816002/</a> |
| Gathering ban | 2020-03-16 | 51 out of 51 | Ohio           | <a href="https://eu.usatoday.com/story/news/health/2020/03/16/coronavirus-live-updates-us-death-toll-rises-cases-testing/5053816002/">https://eu.usatoday.com/story/news/health/2020/03/16/coronavirus-live-updates-us-death-toll-rises-cases-testing/5053816002/</a> |
| Gathering ban | 2020-03-16 | 51 out of 51 | Oklahoma       | <a href="https://eu.usatoday.com/story/news/health/2020/03/16/coronavirus-live-updates-us-death-toll-rises-cases-testing/5053816002/">https://eu.usatoday.com/story/news/health/2020/03/16/coronavirus-live-updates-us-death-toll-rises-cases-testing/5053816002/</a> |

|               |            |              |                |                                                                                                                                                                                                                                                                                                                                                                       |
|---------------|------------|--------------|----------------|-----------------------------------------------------------------------------------------------------------------------------------------------------------------------------------------------------------------------------------------------------------------------------------------------------------------------------------------------------------------------|
| Gathering ban | 2020-03-16 | 51 out of 51 | Oregon         | <a href="https://www.kptv.com/news/covid--in-oregon-governor-cancels-gatherings-of-more-than/article_8e9aafec-67d2-11ea-af7f-2bad23d52443.html">https://www.kptv.com/news/covid--in-oregon-governor-cancels-gatherings-of-more-than/article_8e9aafec-67d2-11ea-af7f-2bad23d52443.html</a>                                                                             |
| Gathering ban | 2020-03-16 | 51 out of 51 | Pennsylvania   | <a href="https://www.governor.pa.gov/newsroom/gov-wolf-puts-statewide-covid-19-mitigation-efforts-in-effect-stresses-need-for-every-pennsylvanian-to-take-action-to-stop-the-spread/">https://www.governor.pa.gov/newsroom/gov-wolf-puts-statewide-covid-19-mitigation-efforts-in-effect-stresses-need-for-every-pennsylvanian-to-take-action-to-stop-the-spread/</a> |
| Gathering ban | 2020-03-16 | 51 out of 51 | Rhode Island   | <a href="https://eu.usatoday.com/story/news/health/2020/03/16/coronavirus-live-updates-us-death-toll-rises-cases-testing/5053816002/">https://eu.usatoday.com/story/news/health/2020/03/16/coronavirus-live-updates-us-death-toll-rises-cases-testing/5053816002/</a>                                                                                                 |
| Gathering ban | 2020-03-16 | 51 out of 51 | South Carolina | <a href="https://eu.usatoday.com/story/news/health/2020/03/16/coronavirus-live-updates-us-death-toll-rises-cases-testing/5053816002/">https://eu.usatoday.com/story/news/health/2020/03/16/coronavirus-live-updates-us-death-toll-rises-cases-testing/5053816002/</a>                                                                                                 |
| Gathering ban | 2020-03-16 | 51 out of 51 | South Dakota   | <a href="https://eu.usatoday.com/story/news/health/2020/03/16/coronavirus-live-updates-us-death-toll-rises-cases-testing/5053816002/">https://eu.usatoday.com/story/news/health/2020/03/16/coronavirus-live-updates-us-death-toll-rises-cases-testing/5053816002/</a>                                                                                                 |
| Gathering ban | 2020-03-16 | 51 out of 51 | Tennessee      | <a href="https://eu.usatoday.com/story/news/health/2020/03/16/coronavirus-live-updates-us-death-toll-rises-cases-testing/5053816002/">https://eu.usatoday.com/story/news/health/2020/03/16/coronavirus-live-updates-us-death-toll-rises-cases-testing/5053816002/</a>                                                                                                 |
| Gathering ban | 2020-03-16 | 51 out of 51 | Texas          | <a href="https://eu.usatoday.com/story/news/health/2020/03/16/coronavirus-live-updates-us-death-toll-rises-cases-testing/5053816002/">https://eu.usatoday.com/story/news/health/2020/03/16/coronavirus-live-updates-us-death-toll-rises-cases-testing/5053816002/</a>                                                                                                 |
| Gathering ban | 2020-03-16 | 51 out of 51 | Utah           | <a href="https://eu.usatoday.com/story/news/health/2020/03/16/coronavirus-live-updates-us-death-toll-rises-cases-testing/5053816002/">https://eu.usatoday.com/story/news/health/2020/03/16/coronavirus-live-updates-us-death-toll-rises-cases-testing/5053816002/</a>                                                                                                 |
| Gathering ban | 2020-03-16 | 51 out of 51 | Vermont        | <a href="https://eu.usatoday.com/story/news/health/2020/03/16/coronavirus-live-updates-us-death-toll-rises-cases-testing/5053816002/">https://eu.usatoday.com/story/news/health/2020/03/16/coronavirus-live-updates-us-death-toll-rises-cases-testing/5053816002/</a>                                                                                                 |
| Gathering ban | 2020-03-16 | 51 out of 51 | Virginia       | <a href="https://eu.usatoday.com/story/news/health/2020/03/16/coronavirus-live-updates-us-death-toll-rises-cases-testing/5053816002/">https://eu.usatoday.com/story/news/health/2020/03/16/coronavirus-live-updates-us-death-toll-rises-cases-testing/5053816002/</a>                                                                                                 |
| Gathering ban | 2020-03-16 | 51 out of 51 | Washington     | <a href="https://eu.usatoday.com/story/news/health/2020/03/16/coronavirus-live-updates-us-death-toll-rises-cases-testing/5053816002/">https://eu.usatoday.com/story/news/health/2020/03/16/coronavirus-live-updates-us-death-toll-rises-cases-testing/5053816002/</a>                                                                                                 |
| Gathering ban | 2020-03-16 | 51 out of 51 | West Virginia  | <a href="https://eu.usatoday.com/story/news/health/2020/03/16/coronavirus-live-updates-us-death-toll-rises-cases-testing/5053816002/">https://eu.usatoday.com/story/news/health/2020/03/16/coronavirus-live-updates-us-death-toll-rises-cases-testing/5053816002/</a>                                                                                                 |
| Gathering ban | 2020-03-16 | 51 out of 51 | Wisconsin      | <a href="https://content.govdelivery.com/accounts/WIGOV/bulletins/2817964">https://content.govdelivery.com/accounts/WIGOV/bulletins/2817964</a>                                                                                                                                                                                                                       |
| Gathering ban | 2020-03-16 | 51 out of 51 | Wyoming        | <a href="https://eu.usatoday.com/story/news/health/2020/03/16/coronavirus-live-updates-us-death-toll-rises-cases-testing/5053816002/">https://eu.usatoday.com/story/news/health/2020/03/16/coronavirus-live-updates-us-death-toll-rises-cases-testing/5053816002/</a>                                                                                                 |

| <b>NPI</b>     | <b>Date</b> | <b># Effective</b> | <b>Region</b> | <b>Source</b>                                                                                                                                                                                                                                                                       |
|----------------|-------------|--------------------|---------------|-------------------------------------------------------------------------------------------------------------------------------------------------------------------------------------------------------------------------------------------------------------------------------------|
| School closure | 2020-03-12  | 1 out of 51        | New Mexico    | <a href="https://www.governor.state.nm.us/2020/03/12/new-mexico-schools-to-temporarily-close/">https://www.governor.state.nm.us/2020/03/12/new-mexico-schools-to-temporarily-close/</a>                                                                                             |
| School closure | 2020-03-13  | 4 out of 51        | Washington    | <a href="https://www.governor.wa.gov/news-media/inslee-announces-statewide-school-closures-expansion-limits-large-gatherings">https://www.governor.wa.gov/news-media/inslee-announces-statewide-school-closures-expansion-limits-large-gatherings</a>                               |
| School closure | 2020-03-13  | 4 out of 51        | West Virginia | <a href="https://governor.wv.gov/News/press-releases/2020/Pages/COVID19-UPDATE-Gov.-Justice-announces-closure-of-West-Virginia-schools.aspx">https://governor.wv.gov/News/press-releases/2020/Pages/COVID19-UPDATE-Gov.-Justice-announces-closure-of-West-Virginia-schools.aspx</a> |

|                |            |              |                      |                                                                                                                                                                                                                                                                                                                                       |
|----------------|------------|--------------|----------------------|---------------------------------------------------------------------------------------------------------------------------------------------------------------------------------------------------------------------------------------------------------------------------------------------------------------------------------------|
| School closure | 2020-03-13 | 4 out of 51  | Wisconsin            | <a href="https://content.govdelivery.com/accounts/WIGOV/bulletins/281127d">https://content.govdelivery.com/accounts/WIGOV/bulletins/281127d</a>                                                                                                                                                                                       |
| School closure | 2020-03-15 | 5 out of 51  | Montana              | <a href="http://opi.mt.gov/COVID-19-Information">http://opi.mt.gov/COVID-19-Information</a>                                                                                                                                                                                                                                           |
| School closure | 2020-03-16 | 29 out of 51 | Alaska               | <a href="https://www.aljazeera.com/news/2020/03/emergencies-closures-states-handling-coronavirus-200317213356419.html">https://www.aljazeera.com/news/2020/03/emergencies-closures-states-handling-coronavirus-200317213356419.html</a>                                                                                               |
| School closure | 2020-03-16 | 29 out of 51 | Arizona              | <a href="https://www.azed.gov/finance/2020/03/16/school-closures-from-march-16-2020-through-march-27-2020/">https://www.azed.gov/finance/2020/03/16/school-closures-from-march-16-2020-through-march-27-2020/</a>                                                                                                                     |
| School closure | 2020-03-16 | 29 out of 51 | Delaware             | <a href="https://www.abc27.com/news/list-states-that-have-closed-all-schools-due-to-coronavirus/">https://www.abc27.com/news/list-states-that-have-closed-all-schools-due-to-coronavirus/</a>                                                                                                                                         |
| School closure | 2020-03-16 | 29 out of 51 | District of Columbia | <a href="https://dcps.dc.gov/coronavirus">https://dcps.dc.gov/coronavirus</a>                                                                                                                                                                                                                                                         |
| School closure | 2020-03-16 | 29 out of 51 | Florida              | <a href="http://www.fldoe.org/newsroom/latest-news/florida-department-of-education-announces-additional-guidance-for-the-2019-20-school-year.shtml">http://www.fldoe.org/newsroom/latest-news/florida-department-of-education-announces-additional-guidance-for-the-2019-20-school-year.shtml</a>                                     |
| School closure | 2020-03-16 | 29 out of 51 | Hawaii               | <a href="https://www.aljazeera.com/news/2020/03/emergencies-closures-states-handling-coronavirus-200317213356419.html">https://www.aljazeera.com/news/2020/03/emergencies-closures-states-handling-coronavirus-200317213356419.html</a>                                                                                               |
| School closure | 2020-03-16 | 29 out of 51 | Illinois             | <a href="https://www.chicagotribune.com/coronavirus/ct-cb-coronavirus-illinois-schools-closed-cps-parents-need-to-know-20200317-zrcim5cpfcgnerkboyx7esg5y-story.html">https://www.chicagotribune.com/coronavirus/ct-cb-coronavirus-illinois-schools-closed-cps-parents-need-to-know-20200317-zrcim5cpfcgnerkboyx7esg5y-story.html</a> |
| School closure | 2020-03-16 | 29 out of 51 | Kentucky             | <a href="https://governor.ky.gov/covid19">https://governor.ky.gov/covid19</a>                                                                                                                                                                                                                                                         |
| School closure | 2020-03-16 | 29 out of 51 | Louisiana            | <a href="https://www.fox61.com/article/news/health/coronavirus/connecticut-coronavirus-updates-march-12/520-ddfcc84c-1521-4354-907b-d53e2642bee9">https://www.fox61.com/article/news/health/coronavirus/connecticut-coronavirus-updates-march-12/520-ddfcc84c-1521-4354-907b-d53e2642bee9</a>                                         |
| School closure | 2020-03-16 | 29 out of 51 | Maine                | <a href="https://www.pressherald.com/2020/03/14/scarborough-closes-schools-through-at-least-march-20/">https://www.pressherald.com/2020/03/14/scarborough-closes-schools-through-at-least-march-20/</a>                                                                                                                               |
| School closure | 2020-03-16 | 29 out of 51 | Maryland             | <a href="https://fox8.com/news/list-states-that-have-closed-all-schools-due-to-coronavirus/">https://fox8.com/news/list-states-that-have-closed-all-schools-due-to-coronavirus/</a>                                                                                                                                                   |
| School closure | 2020-03-16 | 29 out of 51 | Michigan             | <a href="https://www.michigan.gov/whitmer/0,9309,7-387-90499_90705-521890--,00.html">https://www.michigan.gov/whitmer/0,9309,7-387-90499_90705-521890--,00.html</a>                                                                                                                                                                   |
| School closure | 2020-03-16 | 29 out of 51 | Nevada               | <a href="http://www.doe.nv.gov">http://www.doe.nv.gov</a>                                                                                                                                                                                                                                                                             |
| School closure | 2020-03-16 | 29 out of 51 | New Hampshire        | <a href="https://www.governor.nh.gov/news-media/press-2020/20200315-emergency-order-1.html">https://www.governor.nh.gov/news-media/press-2020/20200315-emergency-order-1.html</a>                                                                                                                                                     |
| School closure | 2020-03-16 | 29 out of 51 | New York             | <a href="https://www.governor.ny.gov/news/governor-cuomo-signs-executive-order-closing-schools-statewide-two-weeks">https://www.governor.ny.gov/news/governor-cuomo-signs-executive-order-closing-schools-statewide-two-weeks</a>                                                                                                     |
| School closure | 2020-03-16 | 29 out of 51 | North Carolina       | <a href="https://www.dpi.nc.gov/news/press-releases/2020/03/16/state-board-issues-guidance-personnel-facility-matters-covid-19-closure">https://www.dpi.nc.gov/news/press-releases/2020/03/16/state-board-issues-guidance-personnel-facility-matters-covid-19-closure</a>                                                             |
| School closure | 2020-03-16 | 29 out of 51 | North Dakota         | <a href="https://www.nd.gov/dpi/school-closure-frequently-asked-questions">https://www.nd.gov/dpi/school-closure-frequently-asked-questions</a>                                                                                                                                                                                       |
| School closure | 2020-03-16 | 29 out of 51 | Pennsylvania         | <a href="https://www.governor.pa.gov/newsroom/governor-wolf-announces-closure-of-pennsylvania-schools/">https://www.governor.pa.gov/newsroom/governor-wolf-announces-closure-of-pennsylvania-schools/</a>                                                                                                                             |
| School closure | 2020-03-16 | 29 out of 51 | South Carolina       | <a href="https://thehill.com/homenews/state-watch/487708-south-carolina-closes-schools-amid-outbreak">https://thehill.com/homenews/state-watch/487708-south-carolina-closes-schools-amid-outbreak</a>                                                                                                                                 |
| School closure | 2020-03-16 | 29 out of 51 | South Dakota         | <a href="https://www.nd.gov/dpi/executive-orders-education">https://www.nd.gov/dpi/executive-orders-education</a>                                                                                                                                                                                                                     |

|                                                                   |            |              |               |                                                                                                                                                                                                                                                                                                                                                                                                                                                                                                                                                                   |
|-------------------------------------------------------------------|------------|--------------|---------------|-------------------------------------------------------------------------------------------------------------------------------------------------------------------------------------------------------------------------------------------------------------------------------------------------------------------------------------------------------------------------------------------------------------------------------------------------------------------------------------------------------------------------------------------------------------------|
| School closure                                                    | 2020-03-16 | 29 out of 51 | Tennessee     | <a href="https://www.tn.gov/governor/news/2020/3/16/governor-lee-issues-statement-regarding-statewide-school-closure.html">https://www.tn.gov/governor/news/2020/3/16/governor-lee-issues-statement-regarding-statewide-school-closure.html</a>                                                                                                                                                                                                                                                                                                                   |
| School closure                                                    | 2020-03-16 | 29 out of 51 | Utah          | <a href="https://www.schools.utah.gov/File/b27ab22a-d14f-4e12-b247-f95becea39d3">https://www.schools.utah.gov/File/b27ab22a-d14f-4e12-b247-f95becea39d3</a>                                                                                                                                                                                                                                                                                                                                                                                                       |
| School closure                                                    | 2020-03-16 | 29 out of 51 | Virginia      | <a href="https://www.governor.virginia.gov/newsroom/all-releases/2020/march/headline-854442-en.html">https://www.governor.virginia.gov/newsroom/all-releases/2020/march/headline-854442-en.html</a>                                                                                                                                                                                                                                                                                                                                                               |
| School closure                                                    | 2020-03-16 | 29 out of 51 | Wyoming       | <a href="https://www.ktvq.com/wyoming-governor-directs-schools-to-close">https://www.ktvq.com/wyoming-governor-directs-schools-to-close</a>                                                                                                                                                                                                                                                                                                                                                                                                                       |
| <i>NPI implemented in two thirds of the regions by 2020-03-17</i> |            |              |               |                                                                                                                                                                                                                                                                                                                                                                                                                                                                                                                                                                   |
| School closure                                                    | 2020-03-17 | 38 out of 51 | Arkansas      | <a href="https://www.abc27.com/news/list-states-that-have-closed-all-schools-due-to-coronavirus/">https://www.abc27.com/news/list-states-that-have-closed-all-schools-due-to-coronavirus/</a>                                                                                                                                                                                                                                                                                                                                                                     |
| School closure                                                    | 2020-03-17 | 38 out of 51 | California    | <a href="https://www.abc27.com/news/list-states-that-have-closed-all-schools-due-to-coronavirus/">https://www.abc27.com/news/list-states-that-have-closed-all-schools-due-to-coronavirus/</a>                                                                                                                                                                                                                                                                                                                                                                     |
| School closure                                                    | 2020-03-17 | 38 out of 51 | Connecticut   | <a href="https://patch.com/connecticut/guilford/coronavirus-ct-gov-closes-all-schools-state-has-now-26-cases">https://patch.com/connecticut/guilford/coronavirus-ct-gov-closes-all-schools-state-has-now-26-cases</a>                                                                                                                                                                                                                                                                                                                                             |
| School closure                                                    | 2020-03-17 | 38 out of 51 | Massachusetts | <a href="https://fox8.com/news/list-states-that-have-closed-all-schools-due-to-coronavirus/">https://fox8.com/news/list-states-that-have-closed-all-schools-due-to-coronavirus/</a>                                                                                                                                                                                                                                                                                                                                                                               |
| School closure                                                    | 2020-03-17 | 38 out of 51 | Missouri      | <a href="https://www.abc27.com/news/list-states-that-have-closed-all-schools-due-to-coronavirus/">https://www.abc27.com/news/list-states-that-have-closed-all-schools-due-to-coronavirus/</a>                                                                                                                                                                                                                                                                                                                                                                     |
| School closure                                                    | 2020-03-17 | 38 out of 51 | Ohio          | <a href="https://coronavirus.ohio.gov/wps/wcm/connect/gov/aeadbec1-574d-4a42-9ca4-4487b7a67a4f/Director%27s+Order+-+K-12+Schools+03.14.20.pdf?MOD=AJPERES&amp;CONVERT_TO=url&amp;CACHEID=ROOTWORKSPACE.Z18_M1HGGIKON0J000Q09DDDDM3000-aeadbec1-574d-4a42-9ca4-4487b7a67a4f-n5827Z4">https://coronavirus.ohio.gov/wps/wcm/connect/gov/aeadbec1-574d-4a42-9ca4-4487b7a67a4f/Director%27s+Order+-+K-12+Schools+03.14.20.pdf?MOD=AJPERES&amp;CONVERT_TO=url&amp;CACHEID=ROOTWORKSPACE.Z18_M1HGGIKON0J000Q09DDDDM3000-aeadbec1-574d-4a42-9ca4-4487b7a67a4f-n5827Z4</a> |
| School closure                                                    | 2020-03-17 | 38 out of 51 | Oklahoma      | <a href="https://sde.ok.gov/newsblog/2020-03-16/emergency-state-board-meeting-expected-close-schools-until-april-6">https://sde.ok.gov/newsblog/2020-03-16/emergency-state-board-meeting-expected-close-schools-until-april-6</a>                                                                                                                                                                                                                                                                                                                                 |
| School closure                                                    | 2020-03-17 | 38 out of 51 | Oregon        | <a href="https://www.oregon.gov/newsroom/Pages/NewsDetail.aspx?newsid=36203">https://www.oregon.gov/newsroom/Pages/NewsDetail.aspx?newsid=36203</a>                                                                                                                                                                                                                                                                                                                                                                                                               |
| School closure                                                    | 2020-03-17 | 38 out of 51 | Rhode Island  | <a href="https://www.ride.ri.gov/InsideRIDE/AdditionalInformation/Covid19.aspx">https://www.ride.ri.gov/InsideRIDE/AdditionalInformation/Covid19.aspx</a>                                                                                                                                                                                                                                                                                                                                                                                                         |
| School closure                                                    | 2020-03-18 | 46 out of 51 | Alabama       | <a href="https://www.aljazeera.com/news/2020/03/emergencies-closures-states-handling-coronavirus-200317213356419.html">https://www.aljazeera.com/news/2020/03/emergencies-closures-states-handling-coronavirus-200317213356419.html</a>                                                                                                                                                                                                                                                                                                                           |
| School closure                                                    | 2020-03-18 | 46 out of 51 | Georgia       | <a href="https://www.gpb.org/blogs/education-matters/2020/03/16/gov-kemp-orders-all-k-12-georgia-schools-close-until-end-of-march">https://www.gpb.org/blogs/education-matters/2020/03/16/gov-kemp-orders-all-k-12-georgia-schools-close-until-end-of-march</a>                                                                                                                                                                                                                                                                                                   |
| School closure                                                    | 2020-03-18 | 46 out of 51 | Idaho         | <a href="https://www.idahostatesman.com/news/coronavirus/article241291676.html">https://www.idahostatesman.com/news/coronavirus/article241291676.html</a>                                                                                                                                                                                                                                                                                                                                                                                                         |
| School closure                                                    | 2020-03-18 | 46 out of 51 | Kansas        | <a href="https://www.washingtonpost.com/education/2020/03/17/kansas-is-first-state-close-schools-rest-school-year-amid-coronavirus-crisis-california-could-be-next/">https://www.washingtonpost.com/education/2020/03/17/kansas-is-first-state-close-schools-rest-school-year-amid-coronavirus-crisis-california-could-be-next/</a>                                                                                                                                                                                                                               |
| School closure                                                    | 2020-03-18 | 46 out of 51 | Minnesota     | <a href="https://mn.gov/governor/assets/E0%2020-02%20Final_tcm1055-423084.pdf">https://mn.gov/governor/assets/E0%2020-02%20Final_tcm1055-423084.pdf</a>                                                                                                                                                                                                                                                                                                                                                                                                           |
| School closure                                                    | 2020-03-18 | 46 out of 51 | Nebraska      | <a href="https://www.education.ne.gov/publichealth/known-school-closures/">https://www.education.ne.gov/publichealth/known-school-closures/</a>                                                                                                                                                                                                                                                                                                                                                                                                                   |
| School closure                                                    | 2020-03-18 | 46 out of 51 | New Jersey    | <a href="https://www.nj.gov/governor/news/news/562020/approved/20200316c.shtml">https://www.nj.gov/governor/news/news/562020/approved/20200316c.shtml</a>                                                                                                                                                                                                                                                                                                                                                                                                         |

| School closure | 2020-03-18  | 46 out of 51       | Vermont              | <a href="https://governor.vermont.gov/press-release/gov-scott-orders-orderly-closure-vermont-prek-12-schools-week">https://governor.vermont.gov/press-release/gov-scott-orders-orderly-closure-vermont-prek-12-schools-week</a>                                                                                                                 |
|----------------|-------------|--------------------|----------------------|-------------------------------------------------------------------------------------------------------------------------------------------------------------------------------------------------------------------------------------------------------------------------------------------------------------------------------------------------|
| School closure | 2020-03-19  | 49 out of 51       | Indiana              | <a href="https://www.abc27.com/news/list-states-that-have-closed-all-schools-due-to-coronavirus/">https://www.abc27.com/news/list-states-that-have-closed-all-schools-due-to-coronavirus/</a>                                                                                                                                                   |
| School closure | 2020-03-19  | 49 out of 51       | Mississippi          | <a href="https://www.wlox.com/2020/03/19/gov-tate-reeves-give-update-plans-mississippi-schools/">https://www.wlox.com/2020/03/19/gov-tate-reeves-give-update-plans-mississippi-schools/</a>                                                                                                                                                     |
| School closure | 2020-03-19  | 49 out of 51       | Texas                | <a href="https://www.dallasnews.com/news/public-health/2020/03/19/gov-abbott-announces-temporary-statewide-school-restaurant-gym-closures/">https://www.dallasnews.com/news/public-health/2020/03/19/gov-abbott-announces-temporary-statewide-school-restaurant-gym-closures/</a>                                                               |
| School closure | 2020-03-23  | 50 out of 51       | Colorado             | <a href="https://www.denverpost.com/2020/03/11/colorado-schools-closed-coronavirus/">https://www.denverpost.com/2020/03/11/colorado-schools-closed-coronavirus/</a>                                                                                                                                                                             |
| <b>NPI</b>     | <b>Date</b> | <b># Effective</b> | <b>Region</b>        | <b>Source</b>                                                                                                                                                                                                                                                                                                                                   |
| Venue closure  | 2020-03-15  | 3 out of 51        | District of Columbia | <a href="https://www.washingtonian.com/2020/03/16/mayor-closes-dc-bars-and-restaurants-for-dine-in-service/">https://www.washingtonian.com/2020/03/16/mayor-closes-dc-bars-and-restaurants-for-dine-in-service/</a>                                                                                                                             |
| Venue closure  | 2020-03-15  | 3 out of 51        | Ohio                 | <a href="https://governor.ohio.gov/wps/portal/gov/governor/media/news-and-media/dewine-orders-ohio-bars-restaurants-to-close">https://governor.ohio.gov/wps/portal/gov/governor/media/news-and-media/dewine-orders-ohio-bars-restaurants-to-close</a>                                                                                           |
| Venue closure  | 2020-03-15  | 3 out of 51        | Pennsylvania         | <a href="https://www.governor.pa.gov/newsroom/wolf-administration-orders-restaurants-and-bars-to-close-dine-in-service-in-mitigation-counties-to-stop-spread-of-covid-19/">https://www.governor.pa.gov/newsroom/wolf-administration-orders-restaurants-and-bars-to-close-dine-in-service-in-mitigation-counties-to-stop-spread-of-covid-19/</a> |
| Venue closure  | 2020-03-16  | 18 out of 51       | California           | <a href="https://www.latimes.com/business/story/2020-03-15/coronavirus-close-los-angeles-restaurants">https://www.latimes.com/business/story/2020-03-15/coronavirus-close-los-angeles-restaurants</a>                                                                                                                                           |
| Venue closure  | 2020-03-16  | 18 out of 51       | Connecticut          | <a href="https://www.courant.com/news/connecticut/hc-news-coronavirus-update-0316-20200316-ukhf6fmwh5cvtaob3yiavyzm5q-story.html">https://www.courant.com/news/connecticut/hc-news-coronavirus-update-0316-20200316-ukhf6fmwh5cvtaob3yiavyzm5q-story.html</a>                                                                                   |
| Venue closure  | 2020-03-16  | 18 out of 51       | Delaware             | <a href="https://coronavirus.delaware.gov/wp-content/uploads/sites/177/2020/03/coronavirus_govdec_restBars-1.pdf">https://coronavirus.delaware.gov/wp-content/uploads/sites/177/2020/03/coronavirus_govdec_restBars-1.pdf</a>                                                                                                                   |
| Venue closure  | 2020-03-16  | 18 out of 51       | Illinois             | <a href="https://time.com/5803539/united-states-coronavirus-bars-restaurants/">https://time.com/5803539/united-states-coronavirus-bars-restaurants/</a>                                                                                                                                                                                         |
| Venue closure  | 2020-03-16  | 18 out of 51       | Indiana              | <a href="https://www.wndu.com/content/news/Indiana-governor-closes-restaurants-bars-to-dine-in-customers-568830011.html">https://www.wndu.com/content/news/Indiana-governor-closes-restaurants-bars-to-dine-in-customers-568830011.html</a>                                                                                                     |
| Venue closure  | 2020-03-16  | 18 out of 51       | Kentucky             | <a href="https://governor.ky.gov/covid19">https://governor.ky.gov/covid19</a>                                                                                                                                                                                                                                                                   |
| Venue closure  | 2020-03-16  | 18 out of 51       | Louisiana            | <a href="https://eu.thenewsstar.com/story/news/2020/03/16/louisiana-coronavirus-cases-rise-114-legislature-resume-work/5057909002/">https://eu.thenewsstar.com/story/news/2020/03/16/louisiana-coronavirus-cases-rise-114-legislature-resume-work/5057909002/</a>                                                                               |
| Venue closure  | 2020-03-16  | 18 out of 51       | Maryland             | <a href="https://governor.maryland.gov/2020/03/19/governor-hogan-announces-further-actions-to-slow-the-spread-of-covid-19-relaunches-maryland-unites-initiative/">https://governor.maryland.gov/2020/03/19/governor-hogan-announces-further-actions-to-slow-the-spread-of-covid-19-relaunches-maryland-unites-initiative/</a>                   |
| Venue closure  | 2020-03-16  | 18 out of 51       | Michigan             | <a href="https://www.usnews.com/news/best-states/michigan/articles/2020-03-16/michigan-governor-closes-restaurants-to-dine-in-customers">https://www.usnews.com/news/best-states/michigan/articles/2020-03-16/michigan-governor-closes-restaurants-to-dine-in-customers</a>                                                                     |
| Venue closure  | 2020-03-16  | 18 out of 51       | New Hampshire        | <a href="https://www.governor.nh.gov/news-media/press-2020/20200316-covid-10-businesses.htm">https://www.governor.nh.gov/news-media/press-2020/20200316-covid-10-businesses.htm</a>                                                                                                                                                             |

|                                                                   |            |              |                |                                                                                                                                                                                                                                                                                                                                                                                                             |
|-------------------------------------------------------------------|------------|--------------|----------------|-------------------------------------------------------------------------------------------------------------------------------------------------------------------------------------------------------------------------------------------------------------------------------------------------------------------------------------------------------------------------------------------------------------|
| Venue closure                                                     | 2020-03-16 | 18 out of 51 | New Jersey     | <a href="https://www.nj.gov/governor/news/news/562020/approved/20200316a.shtml">https://www.nj.gov/governor/news/news/562020/approved/20200316a.shtml</a>                                                                                                                                                                                                                                                   |
| Venue closure                                                     | 2020-03-16 | 18 out of 51 | New York       | <a href="https://www.politico.com/states/new-york/albany/story/2020/03/16/new-york-new-jersey-connecticut-closing-bars-restaurants-indefinitely-starting-monday-night-1267159">https://www.politico.com/states/new-york/albany/story/2020/03/16/new-york-new-jersey-connecticut-closing-bars-restaurants-indefinitely-starting-monday-night-1267159</a>                                                     |
| Venue closure                                                     | 2020-03-16 | 18 out of 51 | Oregon         | <a href="https://www.oregon.gov/newsroom/Pages/NewsDetail.aspx?newsid=36192">https://www.oregon.gov/newsroom/Pages/NewsDetail.aspx?newsid=36192</a>                                                                                                                                                                                                                                                         |
| Venue closure                                                     | 2020-03-16 | 18 out of 51 | Rhode Island   | <a href="https://www.ri.gov/press/view/37924">https://www.ri.gov/press/view/37924</a>                                                                                                                                                                                                                                                                                                                       |
| Venue closure                                                     | 2020-03-16 | 18 out of 51 | Washington     | <a href="https://www.governor.wa.gov/news-media/inslee-announces-statewide-shutdown-restaurants-bars-and-expanded-social-gathering-limits">https://www.governor.wa.gov/news-media/inslee-announces-statewide-shutdown-restaurants-bars-and-expanded-social-gathering-limits</a>                                                                                                                             |
| Venue closure                                                     | 2020-03-17 | 28 out of 51 | Colorado       | <a href="https://www.eater.com/2020/3/15/21180761/coronavirus-restaurants-bars-closed-new-york-la-chicago">https://www.eater.com/2020/3/15/21180761/coronavirus-restaurants-bars-closed-new-york-la-chicago</a>                                                                                                                                                                                             |
| Venue closure                                                     | 2020-03-17 | 28 out of 51 | Iowa           | <a href="https://governor.iowa.gov/press-release/gov-reynolds-issues-a-state-of-public-health-disaster-emergency">https://governor.iowa.gov/press-release/gov-reynolds-issues-a-state-of-public-health-disaster-emergency</a>                                                                                                                                                                               |
| Venue closure                                                     | 2020-03-17 | 28 out of 51 | Massachusetts  | <a href="https://www.mass.gov/news/baker-polito-administration-announces-emergency-actions-to-address-covid-19">https://www.mass.gov/news/baker-polito-administration-announces-emergency-actions-to-address-covid-19</a>                                                                                                                                                                                   |
| Venue closure                                                     | 2020-03-17 | 28 out of 51 | Nevada         | <a href="https://nvhealthresponse.nv.gov/wp-content/uploads/2020/03/NV-Health-Reponse-COVID19-Risk-Management-Initiative.pdf">https://nvhealthresponse.nv.gov/wp-content/uploads/2020/03/NV-Health-Reponse-COVID19-Risk-Management-Initiative.pdf</a>                                                                                                                                                       |
| Venue closure                                                     | 2020-03-17 | 28 out of 51 | North Carolina | <a href="https://www.newsobserver.com/news/coronavirus/article241245211.html">https://www.newsobserver.com/news/coronavirus/article241245211.html</a>                                                                                                                                                                                                                                                       |
| Venue closure                                                     | 2020-03-17 | 28 out of 51 | South Carolina | <a href="https://governor.sc.gov/sites/default/files/Documents/Executive-Orders/">https://governor.sc.gov/sites/default/files/Documents/Executive-Orders/</a>                                                                                                                                                                                                                                               |
| Venue closure                                                     | 2020-03-17 | 28 out of 51 | Vermont        | <a href="https://governor.vermont.gov/press-release/governor-phil-scott-announces-new-guidance-covid-19-community-mitigation-measures">https://governor.vermont.gov/press-release/governor-phil-scott-announces-new-guidance-covid-19-community-mitigation-measures</a>                                                                                                                                     |
| Venue closure                                                     | 2020-03-17 | 28 out of 51 | Wisconsin      | <a href="https://madison.com/ct/news/local/govt-and-politics/gov-tony-evers-orders-bars-restaurants-to-be-closed-across-wisconsin-for-in-house-dining/article_40abef70-b51e-5756-962f-801f0387eed6.html">https://madison.com/ct/news/local/govt-and-politics/gov-tony-evers-orders-bars-restaurants-to-be-closed-across-wisconsin-for-in-house-dining/article_40abef70-b51e-5756-962f-801f0387eed6.html</a> |
| Venue closure                                                     | 2020-03-18 | 31 out of 51 | Maine          | <a href="https://www.maine.gov/governor/mills/news/governor-mills-takes-further-steps-respond-covid-19-protect-health-and-safety-maine-people">https://www.maine.gov/governor/mills/news/governor-mills-takes-further-steps-respond-covid-19-protect-health-and-safety-maine-people</a>                                                                                                                     |
| Venue closure                                                     | 2020-03-18 | 31 out of 51 | Utah           | <a href="https://governor.utah.gov/2020/03/18/state-orders-restaurants-bars-to-suspend-dine-in-services-to-slow-spread-of-covid-19/">https://governor.utah.gov/2020/03/18/state-orders-restaurants-bars-to-suspend-dine-in-services-to-slow-spread-of-covid-19/</a>                                                                                                                                         |
| <hr/>                                                             |            |              |                |                                                                                                                                                                                                                                                                                                                                                                                                             |
| <i>NPI implemented in two thirds of the regions by 2020-03-19</i> |            |              |                |                                                                                                                                                                                                                                                                                                                                                                                                             |
| Venue closure                                                     | 2020-03-19 | 36 out of 51 | Arizona        | <a href="https://azgovernor.gov/governor/news/2020/03/governor-ducey-announces-latest-covid-19-actions">https://azgovernor.gov/governor/news/2020/03/governor-ducey-announces-latest-covid-19-actions</a>                                                                                                                                                                                                   |
| Venue closure                                                     | 2020-03-19 | 36 out of 51 | Hawaii         | <a href="https://www.hawaiinewsnow.com/2020/03/19/city-orders-restaurants-bars-night-clubs-close-dine-in-services-days/">https://www.hawaiinewsnow.com/2020/03/19/city-orders-restaurants-bars-night-clubs-close-dine-in-services-days/</a>                                                                                                                                                                 |
| Venue closure                                                     | 2020-03-19 | 36 out of 51 | Nebraska       | <a href="https://www.3newsnow.com/news/coronavirus/directed-health-measures-released-by-governor-ricketts-office">https://www.3newsnow.com/news/coronavirus/directed-health-measures-released-by-governor-ricketts-office</a>                                                                                                                                                                               |
| Venue closure                                                     | 2020-03-19 | 36 out of 51 | New Mexico     | <a href="https://www.governor.state.nm.us/2020/03/18/new-mexico-to-order-additional-closures-to-limit-spread-of-covid-19/">https://www.governor.state.nm.us/2020/03/18/new-mexico-to-order-additional-closures-to-limit-spread-of-covid-19/</a>                                                                                                                                                             |

| Venue closure | 2020-03-19 | 36 out of 51 | Texas        | <a href="https://www.dallasnews.com/news/public-health/2020/03/19/gov-abbott-announces-temporary-statewide-school-restaurant-gym-closures/">https://www.dallasnews.com/news/public-health/2020/03/19/gov-abbott-announces-temporary-statewide-school-restaurant-gym-closures/</a>                                                                                                                           |
|---------------|------------|--------------|--------------|-------------------------------------------------------------------------------------------------------------------------------------------------------------------------------------------------------------------------------------------------------------------------------------------------------------------------------------------------------------------------------------------------------------|
| Venue closure | 2020-03-20 | 41 out of 51 | Arkansas     | <a href="https://www.nwaonline.com/news/2020/mar/20/governor-orders-gyms-restaurants-bars-c/">https://www.nwaonline.com/news/2020/mar/20/governor-orders-gyms-restaurants-bars-c/</a>                                                                                                                                                                                                                       |
| Venue closure | 2020-03-20 | 41 out of 51 | Montana      | <a href="https://news.mt.gov/governor-bullock-announces-closure-of-dine-in-food-service-and-alcoholic-beverage-businesses-and-other-activities-that-pose-enhanced-risks-to-curtailed-spread-of-covid-19">https://news.mt.gov/governor-bullock-announces-closure-of-dine-in-food-service-and-alcoholic-beverage-businesses-and-other-activities-that-pose-enhanced-risks-to-curtailed-spread-of-covid-19</a> |
| Venue closure | 2020-03-20 | 41 out of 51 | North Dakota | <a href="https://www.governor.nd.gov/news/burgum-orders-bars-restaurants-closed-site-patrons-provides-additional-guidance-k-12-schools">https://www.governor.nd.gov/news/burgum-orders-bars-restaurants-closed-site-patrons-provides-additional-guidance-k-12-schools</a>                                                                                                                                   |
| Venue closure | 2020-03-20 | 41 out of 51 | South Dakota | <a href="https://www.governor.nd.gov/news/burgum-orders-bars-restaurants-closed-site-patrons-provides-additional-guidance-k-12-schools">https://www.governor.nd.gov/news/burgum-orders-bars-restaurants-closed-site-patrons-provides-additional-guidance-k-12-schools</a>                                                                                                                                   |
| Venue closure | 2020-03-20 | 41 out of 51 | Wyoming      | <a href="https://health.wyo.gov/governor-and-state-health-officer-issue-public-spaces-closure-order/">https://health.wyo.gov/governor-and-state-health-officer-issue-public-spaces-closure-order/</a>                                                                                                                                                                                                       |
| Venue closure | 2020-03-23 | 43 out of 51 | Missouri     | <a href="https://governor.mo.gov/press-releases/archive/governor-parson-signs-executive-order-20-05-allowing-sale-unprepared-foods">https://governor.mo.gov/press-releases/archive/governor-parson-signs-executive-order-20-05-allowing-sale-unprepared-foods</a>                                                                                                                                           |
| Venue closure | 2020-03-23 | 43 out of 51 | Tennessee    | <a href="https://www.tn.gov/governor/news/2020/3/22/gov--bill-lee-signs-executive-order-mandating-alternative-business-models-for-restaurants-and-gyms--lifts-alcohol-regulations.html">https://www.tn.gov/governor/news/2020/3/22/gov--bill-lee-signs-executive-order-mandating-alternative-business-models-for-restaurants-and-gyms--lifts-alcohol-regulations.html</a>                                   |
| Venue closure | 2020-03-24 | 47 out of 51 | Alaska       | <a href="https://gov.alaska.gov/wp-content/uploads/sites/2/03232020-SOA-COVID-19-Health-Mandate-009.pdf">https://gov.alaska.gov/wp-content/uploads/sites/2/03232020-SOA-COVID-19-Health-Mandate-009.pdf</a>                                                                                                                                                                                                 |
| Venue closure | 2020-03-24 | 47 out of 51 | Georgia      | <a href="https://www.usnews.com/news/best-states/georgia/articles/2020-03-23/counties-in-georgia-enact-restrictions-as-virus-spreads">https://www.usnews.com/news/best-states/georgia/articles/2020-03-23/counties-in-georgia-enact-restrictions-as-virus-spreads</a>                                                                                                                                       |
| Venue closure | 2020-03-24 | 47 out of 51 | Mississippi  | <a href="https://www.jacksonfreepress.com/documents/2020/mar/24/mississippi-covid-19-response/">https://www.jacksonfreepress.com/documents/2020/mar/24/mississippi-covid-19-response/</a>                                                                                                                                                                                                                   |
| Venue closure | 2020-03-24 | 47 out of 51 | Virginia     | <a href="https://www.governor.virginia.gov/newsroom/all-releases/2020/march/headline-855292-en.html">https://www.governor.virginia.gov/newsroom/all-releases/2020/march/headline-855292-en.html</a>                                                                                                                                                                                                         |
| Venue closure | 2020-03-25 | 49 out of 51 | Idaho        | <a href="https://coronavirus.idaho.gov/essential-services/">https://coronavirus.idaho.gov/essential-services/</a>                                                                                                                                                                                                                                                                                           |
| Venue closure | 2020-03-25 | 49 out of 51 | Oklahoma     | <a href="https://kfor.com/news/local/gov-stitt-orders-all-non-essential-businesses-to-close-in-counties-affected-by-covid-19/">https://kfor.com/news/local/gov-stitt-orders-all-non-essential-businesses-to-close-in-counties-affected-by-covid-19/</a>                                                                                                                                                     |
| Venue closure | 2020-03-27 | 50 out of 51 | Alabama      | <a href="https://governor.alabama.gov/assets/2020/03/Amended-Statewide-Social-Distancing-SHO-Order-3.27.2020-FINAL.pdf">https://governor.alabama.gov/assets/2020/03/Amended-Statewide-Social-Distancing-SHO-Order-3.27.2020-FINAL.pdf</a>                                                                                                                                                                   |
| Venue closure | 2020-03-30 | 51 out of 51 | Kansas       | <a href="https://governor.kansas.gov/governor-kelly-issues-temporary-statewide-stay-home-order-in-ongoing-effort-to-combat-covid-19/">https://governor.kansas.gov/governor-kelly-issues-temporary-statewide-stay-home-order-in-ongoing-effort-to-combat-covid-19/</a>                                                                                                                                       |
| NPI           | Date       | # Effective  | Region       | Source                                                                                                                                                                                                                                                                                                                                                                                                      |

|          |            |              |               |                                                                                                                                                                                                                                                                                                                                                                                 |
|----------|------------|--------------|---------------|---------------------------------------------------------------------------------------------------------------------------------------------------------------------------------------------------------------------------------------------------------------------------------------------------------------------------------------------------------------------------------|
| Lockdown | 2020-01-04 | 1 out of 51  | Nevada        | <a href="https://www.fox5vegas.com/coronavirus/nevada-gov-sisolak-issues-stay-at-home-directive-through-april-30/article_6b11e83c-7430-11ea-abe6-0f026facbed.html">https://www.fox5vegas.com/coronavirus/nevada-gov-sisolak-issues-stay-at-home-directive-through-april-30/article_6b11e83c-7430-11ea-abe6-0f026facbed.html</a>                                                 |
| Lockdown | 2020-03-19 | 2 out of 51  | California    | <a href="https://www.gov.ca.gov/2020/03/19/governor-gavin-newsom-issues-stay-at-home-order/">https://www.gov.ca.gov/2020/03/19/governor-gavin-newsom-issues-stay-at-home-order/</a>                                                                                                                                                                                             |
| Lockdown | 2020-03-21 | 4 out of 51  | Illinois      | <a href="https://www2.illinois.gov/Pages/news-item.aspx?ReleaseID=21288">https://www2.illinois.gov/Pages/news-item.aspx?ReleaseID=21288</a>                                                                                                                                                                                                                                     |
| Lockdown | 2020-03-21 | 4 out of 51  | New Jersey    | <a href="https://www.nj.gov/governor/news/news/562020/approved/20200320j.shtml">https://www.nj.gov/governor/news/news/562020/approved/20200320j.shtml</a>                                                                                                                                                                                                                       |
| Lockdown | 2020-03-22 | 5 out of 51  | New York      | <a href="https://patch.com/new-york/new-york-city/new-yorks-stay-home-order-goes-effect">https://patch.com/new-york/new-york-city/new-yorks-stay-home-order-goes-effect</a>                                                                                                                                                                                                     |
| Lockdown | 2020-03-23 | 11 out of 51 | Connecticut   | <a href="https://portal.ct.gov/Office-of-the-Governor/News/Press-Releases/2020/03-2020-Governor-Lamont-Releases-Guidance-to-Businesses-on-Order-Asking-Connecticut-to-Stay-Safe-Stay-Home">https://portal.ct.gov/Office-of-the-Governor/News/Press-Releases/2020/03-2020-Governor-Lamont-Releases-Guidance-to-Businesses-on-Order-Asking-Connecticut-to-Stay-Safe-Stay-Home</a> |
| Lockdown | 2020-03-23 | 11 out of 51 | Louisiana     | <a href="https://gov.louisiana.gov/assets/Proclamations/2020/JBE-33-2020.pdf">https://gov.louisiana.gov/assets/Proclamations/2020/JBE-33-2020.pdf</a>                                                                                                                                                                                                                           |
| Lockdown | 2020-03-23 | 11 out of 51 | New Mexico    | <a href="https://www.governor.state.nm.us/2020/03/23/state-enacts-further-restrictions-to-stop-spread-including-stay-at-home-instruction/">https://www.governor.state.nm.us/2020/03/23/state-enacts-further-restrictions-to-stop-spread-including-stay-at-home-instruction/</a>                                                                                                 |
| Lockdown | 2020-03-23 | 11 out of 51 | Ohio          | <a href="https://coronavirus.ohio.gov/static/DirectorsOrderStayAtHome.pdf">https://coronavirus.ohio.gov/static/DirectorsOrderStayAtHome.pdf</a>                                                                                                                                                                                                                                 |
| Lockdown | 2020-03-23 | 11 out of 51 | Oregon        | <a href="https://www.oregon.gov/newsroom/Pages/NewsDetail.aspx?newsid=36240">https://www.oregon.gov/newsroom/Pages/NewsDetail.aspx?newsid=36240</a>                                                                                                                                                                                                                             |
| Lockdown | 2020-03-23 | 11 out of 51 | Washington    | <a href="https://www.governor.wa.gov/news-media/inslee-announces-stay-home-stay-healthy%C2%A0order">https://www.governor.wa.gov/news-media/inslee-announces-stay-home-stay-healthy%C2%A0order</a>                                                                                                                                                                               |
| Lockdown | 2020-03-24 | 16 out of 51 | Delaware      | <a href="https://governor.delaware.gov/wp-content/uploads/sites/24/2020/03/Fifth-Modification-to-State-of-Emergency-03222020.pdf">https://governor.delaware.gov/wp-content/uploads/sites/24/2020/03/Fifth-Modification-to-State-of-Emergency-03222020.pdf</a>                                                                                                                   |
| Lockdown | 2020-03-24 | 16 out of 51 | Massachusetts | <a href="https://www.mass.gov/news/dph-public-health-advisory-stay-at-home-advisory">https://www.mass.gov/news/dph-public-health-advisory-stay-at-home-advisory</a>                                                                                                                                                                                                             |
| Lockdown | 2020-03-24 | 16 out of 51 | Michigan      | <a href="https://www.michigan.gov/coronavirus/0,9753,7-406-98178_98455-521682--,00.html">https://www.michigan.gov/coronavirus/0,9753,7-406-98178_98455-521682--,00.html</a>                                                                                                                                                                                                     |
| Lockdown | 2020-03-24 | 16 out of 51 | Vermont       | <a href="https://governor.vermont.gov/sites/scott/files/documents/ADDENDUM%206%20TO%20EXECUTIVE%20ORDER%2001-20.pdf">https://governor.vermont.gov/sites/scott/files/documents/ADDENDUM%206%20TO%20EXECUTIVE%20ORDER%2001-20.pdf</a>                                                                                                                                             |
| Lockdown | 2020-03-24 | 16 out of 51 | West Virginia | <a href="https://governor.wv.gov/News/press-releases/2020/Pages/COVID-19-UPDATE-Gov.-Justice-issues-Stay-at-Home-order-for-all-West-Virginians.aspx">https://governor.wv.gov/News/press-releases/2020/Pages/COVID-19-UPDATE-Gov.-Justice-issues-Stay-at-Home-order-for-all-West-Virginians.aspx</a>                                                                             |
| Lockdown | 2020-03-25 | 20 out of 51 | Hawaii        | <a href="https://governor.hawaii.gov/newsroom/latest-news/office-of-the-governor-news-release-governor-ige-issues-statewide-order-to-stay-at-home-work-from-home-to-fight-covid-19/">https://governor.hawaii.gov/newsroom/latest-news/office-of-the-governor-news-release-governor-ige-issues-statewide-order-to-stay-at-home-work-from-home-to-fight-covid-19/</a>             |
| Lockdown | 2020-03-25 | 20 out of 51 | Idaho         | <a href="https://www.idahostatesman.com/news/coronavirus/article241479406.html">https://www.idahostatesman.com/news/coronavirus/article241479406.html</a>                                                                                                                                                                                                                       |
| Lockdown | 2020-03-25 | 20 out of 51 | Indiana       | <a href="https://www.in.gov/gov/3232.htm">https://www.in.gov/gov/3232.htm</a>                                                                                                                                                                                                                                                                                                   |
| Lockdown | 2020-03-25 | 20 out of 51 | Wisconsin     | <a href="https://content.govdelivery.com/accounts/WIGOV/bulletins/282deef">https://content.govdelivery.com/accounts/WIGOV/bulletins/282deef</a>                                                                                                                                                                                                                                 |
| Lockdown | 2020-03-26 | 22 out of 51 | Colorado      | <a href="https://bloximages.newyork1.vip.townnews.com/coloradopolitics.com/content/tncms/assets/v3/editorial/1/5c/15c0d646-6efd-11ea-9f44-936924cd21a7/5e7bfea00dc56.pdf.pdf">https://bloximages.newyork1.vip.townnews.com/coloradopolitics.com/content/tncms/assets/v3/editorial/1/5c/15c0d646-6efd-11ea-9f44-936924cd21a7/5e7bfea00dc56.pdf.pdf</a>                           |
| Lockdown | 2020-03-26 | 22 out of 51 | New Hampshire | <a href="https://www.governor.nh.gov/news-media/emergency-orders/documents/emergency-order-17-1.pdf">https://www.governor.nh.gov/news-media/emergency-orders/documents/emergency-order-17-1.pdf</a>                                                                                                                                                                             |



| Lockdown                                                                   | 2020-03-27 | 24 out of 51 | Minnesota            | <a href="https://mn.gov/governor/assets/3a.%20EO%2020-20%20FINAL%20SIGNED%20Filed_tcm1055-425020.pdf">https://mn.gov/governor/assets/3a.%20EO%2020-20%20FINAL%20SIGNED%20Filed_tcm1055-425020.pdf</a>                                                                                                                                       |
|----------------------------------------------------------------------------|------------|--------------|----------------------|---------------------------------------------------------------------------------------------------------------------------------------------------------------------------------------------------------------------------------------------------------------------------------------------------------------------------------------------|
| Lockdown                                                                   | 2020-03-27 | 24 out of 51 | Utah                 | <a href="https://coronavirus.utah.gov/full-text-governors-stay-home-stay-safe-directive/">https://coronavirus.utah.gov/full-text-governors-stay-home-stay-safe-directive/</a>                                                                                                                                                               |
| Lockdown                                                                   | 2020-03-28 | 27 out of 51 | Alaska               | <a href="https://gov.alaska.gov/home/covid19-healthmandates/">https://gov.alaska.gov/home/covid19-healthmandates/</a>                                                                                                                                                                                                                       |
| Lockdown                                                                   | 2020-03-28 | 27 out of 51 | Montana              | <a href="https://news.mt.gov/governor-bullock-issues-stay-at-home-directive-to-slow-the-spread-of-covid-19">https://news.mt.gov/governor-bullock-issues-stay-at-home-directive-to-slow-the-spread-of-covid-19</a>                                                                                                                           |
| Lockdown                                                                   | 2020-03-28 | 27 out of 51 | Rhode Island         | <a href="http://www.governor.ri.gov/documents/orders/Executive-Order-20-13.pdf">http://www.governor.ri.gov/documents/orders/Executive-Order-20-13.pdf</a>                                                                                                                                                                                   |
| Lockdown                                                                   | 2020-03-30 | 32 out of 51 | District of Columbia | <a href="https://coronavirus.dc.gov/release/mayor-bowser-issues-stay-home-order">https://coronavirus.dc.gov/release/mayor-bowser-issues-stay-home-order</a>                                                                                                                                                                                 |
| Lockdown                                                                   | 2020-03-30 | 32 out of 51 | Kansas               | <a href="https://governor.kansas.gov/wp-content/uploads/2020/03/E020-16.pdf">https://governor.kansas.gov/wp-content/uploads/2020/03/E020-16.pdf</a>                                                                                                                                                                                         |
| Lockdown                                                                   | 2020-03-30 | 32 out of 51 | Maryland             | <a href="https://www.youtube.com/watch?v=8TPx6pxBCyM">https://www.youtube.com/watch?v=8TPx6pxBCyM</a>                                                                                                                                                                                                                                       |
| Lockdown                                                                   | 2020-03-30 | 32 out of 51 | North Carolina       | <a href="https://files.nc.gov/governor/documents/files/E0121-Stay-at-Home-Order-3.pdf">https://files.nc.gov/governor/documents/files/E0121-Stay-at-Home-Order-3.pdf</a>                                                                                                                                                                     |
| Lockdown                                                                   | 2020-03-30 | 32 out of 51 | Virginia             | <a href="https://www.governor.virginia.gov/newsroom/all-releases/2020/march/headline-855702-en.html">https://www.governor.virginia.gov/newsroom/all-releases/2020/march/headline-855702-en.html</a>                                                                                                                                         |
| Lockdown                                                                   | 2020-03-31 | 33 out of 51 | Arizona              | <a href="https://azgovernor.gov/governor/news/2020/03/stay-home-stay-healthy-stay-connected">https://azgovernor.gov/governor/news/2020/03/stay-home-stay-healthy-stay-connected</a>                                                                                                                                                         |
| -----<br><i>NPI implemented in two thirds of the regions by 2020-04-01</i> |            |              |                      |                                                                                                                                                                                                                                                                                                                                             |
| Lockdown                                                                   | 2020-04-01 | 36 out of 51 | Florida              | <a href="https://eu.floridatoday.com/story/news/2020/04/01/coronavirus-florida-stay-home-order-what-means-explanation-what-essential-non-essential-desantis/5104936002/">https://eu.floridatoday.com/story/news/2020/04/01/coronavirus-florida-stay-home-order-what-means-explanation-what-essential-non-essential-desantis/5104936002/</a> |
| Lockdown                                                                   | 2020-04-01 | 36 out of 51 | Pennsylvania         | <a href="https://www.nytimes.com/interactive/2020/us/coronavirus-stay-at-home-order.html">https://www.nytimes.com/interactive/2020/us/coronavirus-stay-at-home-order.html</a>                                                                                                                                                               |
| Lockdown                                                                   | 2020-04-01 | 36 out of 51 | Tennessee            | <a href="https://publications.tnsosfiles.com/pub/execorders/exec-orders-lee22.pdf">https://publications.tnsosfiles.com/pub/execorders/exec-orders-lee22.pdf</a>                                                                                                                                                                             |
| Lockdown                                                                   | 2020-04-02 | 39 out of 51 | Georgia              | <a href="https://gov.georgia.gov/document/2020-executive-order/04022001/download">https://gov.georgia.gov/document/2020-executive-order/04022001/download</a>                                                                                                                                                                               |
| Lockdown                                                                   | 2020-04-02 | 39 out of 51 | Maine                | <a href="https://www.maine.gov/governor/mills/news/governor-mills-issues-stay-healthy-home-mandate-2020-03-31">https://www.maine.gov/governor/mills/news/governor-mills-issues-stay-healthy-home-mandate-2020-03-31</a>                                                                                                                     |
| Lockdown                                                                   | 2020-04-03 | 40 out of 51 | Mississippi          | <a href="https://thehill.com/homenews/state-watch/490674-mississippi-governor-issues-stay-at-home-order">https://thehill.com/homenews/state-watch/490674-mississippi-governor-issues-stay-at-home-order</a>                                                                                                                                 |
| Lockdown                                                                   | 2020-04-04 | 41 out of 51 | Alabama              | <a href="https://governor.alabama.gov/newsroom/2020/04/governor-ivey-issues-stay-at-home-order/">https://governor.alabama.gov/newsroom/2020/04/governor-ivey-issues-stay-at-home-order/</a>                                                                                                                                                 |
| Lockdown                                                                   | 2020-04-06 | 42 out of 51 | Missouri             | <a href="https://governor.mo.gov/priorities/stay-home-order">https://governor.mo.gov/priorities/stay-home-order</a>                                                                                                                                                                                                                         |
| Lockdown                                                                   | 2020-04-07 | 43 out of 51 | South Carolina       | <a href="http://abcnews4.com/news/local/gov-mcmaster-orders-stay-at-home-order-for-south-carolina">http://abcnews4.com/news/local/gov-mcmaster-orders-stay-at-home-order-for-south-carolina</a>                                                                                                                                             |
| NPI                                                                        | Date       | # Effective  | Region               | Source                                                                                                                                                                                                                                                                                                                                      |
| Work ban                                                                   | 2020-03-19 | 2 out of 51  | California           | <a href="https://www.gov.ca.gov/2020/03/19/governor-gavin-newsom-issues-stay-at-home-order/">https://www.gov.ca.gov/2020/03/19/governor-gavin-newsom-issues-stay-at-home-order/</a>                                                                                                                                                         |

|          |            |              |               |                                                                                                                                                                                                                                                                                                                                                                                                       |
|----------|------------|--------------|---------------|-------------------------------------------------------------------------------------------------------------------------------------------------------------------------------------------------------------------------------------------------------------------------------------------------------------------------------------------------------------------------------------------------------|
| Work ban | 2020-03-19 | 2 out of 51  | Pennsylvania  | <a href="https://www.governor.pa.gov/newsroom/all-non-life-sustaining-businesses-in-pennsylvania-to-close-physical-locations-as-of-8-pm-today-to-slow-spread-of-covid-19/">https://www.governor.pa.gov/newsroom/all-non-life-sustaining-businesses-in-pennsylvania-to-close-physical-locations-as-of-8-pm-today-to-slow-spread-of-covid-19/</a>                                                       |
| Work ban | 2020-03-21 | 4 out of 51  | Illinois      | <a href="https://www.nytimes.com/2020/03/21/world/coronavirus-news.html">https://www.nytimes.com/2020/03/21/world/coronavirus-news.html</a>                                                                                                                                                                                                                                                           |
| Work ban | 2020-03-21 | 4 out of 51  | New Jersey    | <a href="https://www.nj.gov/governor/news/news/562020/approved/20200320j.shtml">https://www.nj.gov/governor/news/news/562020/approved/20200320j.shtml</a>                                                                                                                                                                                                                                             |
| Work ban | 2020-03-22 | 5 out of 51  | New York      | <a href="https://www.governor.ny.gov/news/no-2028-continuing-temporary-suspension-and-modification-laws-relating-disaster-emergency">https://www.governor.ny.gov/news/no-2028-continuing-temporary-suspension-and-modification-laws-relating-disaster-emergency</a>                                                                                                                                   |
| Work ban | 2020-03-23 | 12 out of 51 | Connecticut   | <a href="https://portal.ct.gov/Office-of-the-Governor/News/Press-Releases/2020/03-2020/Governor-Lamont-Signs-Executive-Order-Asking-Connecticut-Businesses-and-Residents-Stay-Safe">https://portal.ct.gov/Office-of-the-Governor/News/Press-Releases/2020/03-2020/Governor-Lamont-Signs-Executive-Order-Asking-Connecticut-Businesses-and-Residents-Stay-Safe</a>                                     |
| Work ban | 2020-03-23 | 12 out of 51 | Maryland      | <a href="https://governor.maryland.gov/2020/03/23/governor-hogan-announces-closure-of-all-non-essential-businesses-175-million-relief-package-for-workers-and-small-businesses-affected-by-covid-19/">https://governor.maryland.gov/2020/03/23/governor-hogan-announces-closure-of-all-non-essential-businesses-175-million-relief-package-for-workers-and-small-businesses-affected-by-covid-19/</a> |
| Work ban | 2020-03-23 | 12 out of 51 | Massachusetts | <a href="https://www.mass.gov/news/governor-charlie-baker-orders-all-non-essential-businesses-to-cease-in-person-operation">https://www.mass.gov/news/governor-charlie-baker-orders-all-non-essential-businesses-to-cease-in-person-operation</a>                                                                                                                                                     |
| Work ban | 2020-03-23 | 12 out of 51 | New Mexico    | <a href="https://www.governor.state.nm.us/2020/03/23/state-enacts-further-restrictions-to-stop-spread-including-stay-at-home-instruction/">https://www.governor.state.nm.us/2020/03/23/state-enacts-further-restrictions-to-stop-spread-including-stay-at-home-instruction/</a>                                                                                                                       |
| Work ban | 2020-03-23 | 12 out of 51 | Ohio          | <a href="https://coronavirus.ohio.gov/static/DirectorsOrderStayAtHome.pdf">https://coronavirus.ohio.gov/static/DirectorsOrderStayAtHome.pdf</a>                                                                                                                                                                                                                                                       |
| Work ban | 2020-03-23 | 12 out of 51 | Oregon        | <a href="https://govstatus.egov.com/or-covid-19">https://govstatus.egov.com/or-covid-19</a>                                                                                                                                                                                                                                                                                                           |
| Work ban | 2020-03-23 | 12 out of 51 | Washington    | <a href="https://www.governor.wa.gov/news-media/inslee-announces-stay-home-stay-healthy%2%A0order">https://www.governor.wa.gov/news-media/inslee-announces-stay-home-stay-healthy%2%A0order</a>                                                                                                                                                                                                       |
| Work ban | 2020-03-24 | 16 out of 51 | Delaware      | <a href="https://governor.delaware.gov/wp-content/uploads/sites/24/2020/03/Fourth-Modification-to-State-of-Emergency-03222020.pdf">https://governor.delaware.gov/wp-content/uploads/sites/24/2020/03/Fourth-Modification-to-State-of-Emergency-03222020.pdf</a>                                                                                                                                       |
| Work ban | 2020-03-24 | 16 out of 51 | Michigan      | <a href="https://www.michigan.gov/coronavirus/0,9753,7-406-98178_98455-521682--,00.html">https://www.michigan.gov/coronavirus/0,9753,7-406-98178_98455-521682--,00.html</a>                                                                                                                                                                                                                           |
| Work ban | 2020-03-24 | 16 out of 51 | Vermont       | <a href="https://governor.vermont.gov/sites/scott/files/documents/ADDENDUM%206%20TO%20EXECUTIVE%20ORDER%2001-20.pdf">https://governor.vermont.gov/sites/scott/files/documents/ADDENDUM%206%20TO%20EXECUTIVE%20ORDER%2001-20.pdf</a>                                                                                                                                                                   |
| Work ban | 2020-03-24 | 16 out of 51 | West Virginia | <a href="https://governor.wv.gov/News/press-releases/2020/Pages/COVID-19-UPDATE-Gov.-Justice-issues-Stay-at-Home-order-for-all-West-Virginians.aspx">https://governor.wv.gov/News/press-releases/2020/Pages/COVID-19-UPDATE-Gov.-Justice-issues-Stay-at-Home-order-for-all-West-Virginians.aspx</a>                                                                                                   |
| Work ban | 2020-03-25 | 21 out of 51 | Hawaii        | <a href="https://governor.hawaii.gov/newsroom/latest-news/office-of-the-governor-news-release-governor-ige-issues-statewide-order-to-stay-at-home-work-from-home-to-fight-covid-19/">https://governor.hawaii.gov/newsroom/latest-news/office-of-the-governor-news-release-governor-ige-issues-statewide-order-to-stay-at-home-work-from-home-to-fight-covid-19/</a>                                   |
| Work ban | 2020-03-25 | 21 out of 51 | Idaho         | <a href="https://www.idahostatesman.com/news/coronavirus/article241479406.html">https://www.idahostatesman.com/news/coronavirus/article241479406.html</a>                                                                                                                                                                                                                                             |
| Work ban | 2020-03-25 | 21 out of 51 | Indiana       | <a href="https://www.in.gov/gov/3232.htm">https://www.in.gov/gov/3232.htm</a>                                                                                                                                                                                                                                                                                                                         |
| Work ban | 2020-03-25 | 21 out of 51 | Oklahoma      | <a href="https://www.sos.ok.gov/documents/executive/1919.pdf">https://www.sos.ok.gov/documents/executive/1919.pdf</a>                                                                                                                                                                                                                                                                                 |
| Work ban | 2020-03-25 | 21 out of 51 | Wisconsin     | <a href="https://content.govdelivery.com/accounts/WIGOV/bulletins/282deef">https://content.govdelivery.com/accounts/WIGOV/bulletins/282deef</a>                                                                                                                                                                                                                                                       |

|                                                                   |            |              |                      |                                                                                                                                                                                                                                                                                                                                                       |
|-------------------------------------------------------------------|------------|--------------|----------------------|-------------------------------------------------------------------------------------------------------------------------------------------------------------------------------------------------------------------------------------------------------------------------------------------------------------------------------------------------------|
| Work ban                                                          | 2020-03-26 | 24 out of 51 | Colorado             | <a href="https://bloximages.newyork1.vip.townnews.com/coloradopolitics.com/content/tncms/assets/v3/editorial/1/5c/15c0d646-6efd-11ea-9f44-936924cd21a7/5e7bfea00dc56.pdf.pdf">https://bloximages.newyork1.vip.townnews.com/coloradopolitics.com/content/tncms/assets/v3/editorial/1/5c/15c0d646-6efd-11ea-9f44-936924cd21a7/5e7bfea00dc56.pdf.pdf</a> |
| Work ban                                                          | 2020-03-26 | 24 out of 51 | Kentucky             | <a href="https://governor.ky.gov/attachments/20200325_Executive-Order_2020-257_Healthy-at-Home.pdf">https://governor.ky.gov/attachments/20200325_Executive-Order_2020-257_Healthy-at-Home.pdf</a>                                                                                                                                                     |
| Work ban                                                          | 2020-03-26 | 24 out of 51 | New Hampshire        | <a href="https://www.governor.nh.gov/news-media/emergency-orders/documents/emergency-order-17-1.pdf">https://www.governor.nh.gov/news-media/emergency-orders/documents/emergency-order-17-1.pdf</a>                                                                                                                                                   |
| Work ban                                                          | 2020-03-27 | 26 out of 51 | Minnesota            | <a href="https://mn.gov/governor/assets/3a.%20E0%2020-20%20FINAL%20SIGNED%20Filed_tcm1055-425020.pdf">https://mn.gov/governor/assets/3a.%20E0%2020-20%20FINAL%20SIGNED%20Filed_tcm1055-425020.pdf</a>                                                                                                                                                 |
| Work ban                                                          | 2020-03-28 | 28 out of 51 | Alaska               | <a href="https://gov.alaska.gov/home/covid19-healthmandates/">https://gov.alaska.gov/home/covid19-healthmandates/</a>                                                                                                                                                                                                                                 |
| Work ban                                                          | 2020-03-28 | 28 out of 51 | Montana              | <a href="https://news.mt.gov/governor-bullock-issues-stay-at-home-directive-to-slow-the-spread-of-covid-19">https://news.mt.gov/governor-bullock-issues-stay-at-home-directive-to-slow-the-spread-of-covid-19</a>                                                                                                                                     |
| Work ban                                                          | 2020-03-30 | 32 out of 51 | District of Columbia | <a href="https://coronavirus.dc.gov/release/mayor-bowser-issues-stay-home-order">https://coronavirus.dc.gov/release/mayor-bowser-issues-stay-home-order</a>                                                                                                                                                                                           |
| Work ban                                                          | 2020-03-30 | 32 out of 51 | Kansas               | <a href="https://governor.kansas.gov/governor-kelly-issues-temporary-statewide-stay-home-order-in-ongoing-effort-to-combat-covid-19/">https://governor.kansas.gov/governor-kelly-issues-temporary-statewide-stay-home-order-in-ongoing-effort-to-combat-covid-19/</a>                                                                                 |
| Work ban                                                          | 2020-03-30 | 32 out of 51 | North Carolina       | <a href="https://files.nc.gov/governor/documents/files/E0121-Stay-at-Home-Order-3.pdf">https://files.nc.gov/governor/documents/files/E0121-Stay-at-Home-Order-3.pdf</a>                                                                                                                                                                               |
| Work ban                                                          | 2020-03-30 | 32 out of 51 | Rhode Island         | <a href="http://www.governor.ri.gov/documents/orders/Executive-Order-20-13.pdf">http://www.governor.ri.gov/documents/orders/Executive-Order-20-13.pdf</a>                                                                                                                                                                                             |
| Work ban                                                          | 2020-04-01 | 33 out of 51 | Tennessee            | <a href="https://publications.tnsosfiles.com/pub/execorders/exec-orders-lee22.pdf">https://publications.tnsosfiles.com/pub/execorders/exec-orders-lee22.pdf</a>                                                                                                                                                                                       |
| <i>NPI implemented in two thirds of the regions by 2020-04-02</i> |            |              |                      |                                                                                                                                                                                                                                                                                                                                                       |
| Work ban                                                          | 2020-04-07 | 35 out of 51 | South Carolina       | <a href="http://abcnews4.com/news/local/gov-mcmaster-orders-stay-at-home-order-for-south-carolina">http://abcnews4.com/news/local/gov-mcmaster-orders-stay-at-home-order-for-south-carolina</a>                                                                                                                                                       |

Table 7: Sources for policies implemented across different US States

| <b>NPI</b>                                                        | <b>Date</b> | <b># Effective</b> | <b>Region</b>              | <b>Source</b>                                                                                                                                                                                                                                                                                                                                 |
|-------------------------------------------------------------------|-------------|--------------------|----------------------------|-----------------------------------------------------------------------------------------------------------------------------------------------------------------------------------------------------------------------------------------------------------------------------------------------------------------------------------------------|
| Event ban                                                         | 2020-03-09  | 1 out of 16        | Bavaria                    | <a href="https://www.br.de/nachrichten/bayern/coronavirus-bayern-will-grossveranstaltungen-verbieten,RslNyZ0">https://www.br.de/nachrichten/bayern/coronavirus-bayern-will-grossveranstaltungen-verbieten,RslNyZ0</a>                                                                                                                         |
| Event ban                                                         | 2020-03-10  | 2 out of 16        | North Rhine- Westphalia    | <a href="https://www1.wdr.de/nachrichten/themen/coronavirus/veranstaltungen-coronavirus-absage-nrw-100.html">https://www1.wdr.de/nachrichten/themen/coronavirus/veranstaltungen-coronavirus-absage-nrw-100.html</a>                                                                                                                           |
| Event ban                                                         | 2020-03-11  | 7 out of 16        | Baden- Wuerttemberg        | <a href="https://bnn.de/lokales/karlsruhe/baden-wuerttemberg-will-grosse-veranstaltungen-wegen-des-coronavirus-untersagen-lassen">https://bnn.de/lokales/karlsruhe/baden-wuerttemberg-will-grosse-veranstaltungen-wegen-des-coronavirus-untersagen-lassen</a>                                                                                 |
| Event ban                                                         | 2020-03-11  | 7 out of 16        | Berlin                     | <a href="https://www.t-online.de/nachrichten/panorama/id_87498882/coronavirus-in-diesen-bundeslaendern-sind-grossveranstaltungen-verboden.html">https://www.t-online.de/nachrichten/panorama/id_87498882/coronavirus-in-diesen-bundeslaendern-sind-grossveranstaltungen-verboden.html</a>                                                     |
| Event ban                                                         | 2020-03-11  | 7 out of 16        | Hamburg                    | <a href="https://www.t-online.de/nachrichten/panorama/id_87498882/coronavirus-in-diesen-bundeslaendern-sind-grossveranstaltungen-verboden.html">https://www.t-online.de/nachrichten/panorama/id_87498882/coronavirus-in-diesen-bundeslaendern-sind-grossveranstaltungen-verboden.html</a>                                                     |
| Event ban                                                         | 2020-03-11  | 7 out of 16        | Lower Saxony               | <a href="https://www.t-online.de/nachrichten/panorama/id_87498882/coronavirus-in-diesen-bundeslaendern-sind-grossveranstaltungen-verboden.html">https://www.t-online.de/nachrichten/panorama/id_87498882/coronavirus-in-diesen-bundeslaendern-sind-grossveranstaltungen-verboden.html</a>                                                     |
| Event ban                                                         | 2020-03-11  | 7 out of 16        | Schleswig- Holstein        | <a href="https://www.ndr.de/nachrichten/schleswig-holstein/Details-zur-Absage-von-Grossveranstaltungen-,pk214.html">https://www.ndr.de/nachrichten/schleswig-holstein/Details-zur-Absage-von-Grossveranstaltungen-,pk214.html</a>                                                                                                             |
| Event ban                                                         | 2020-03-12  | 9 out of 16        | Bremen                     | <a href="https://www.t-online.de/nachrichten/panorama/id_87498882/coronavirus-in-diesen-bundeslaendern-sind-grossveranstaltungen-verboden.html">https://www.t-online.de/nachrichten/panorama/id_87498882/coronavirus-in-diesen-bundeslaendern-sind-grossveranstaltungen-verboden.html</a>                                                     |
| Event ban                                                         | 2020-03-12  | 9 out of 16        | Thuringia                  | <a href="https://www.mdr.de/thueringen/coronavirus-veranstaltungen-massnahmen-teilnehmer-100.html">https://www.mdr.de/thueringen/coronavirus-veranstaltungen-massnahmen-teilnehmer-100.html</a>                                                                                                                                               |
| <i>NPI implemented in two thirds of the regions by 2020-03-13</i> |             |                    |                            |                                                                                                                                                                                                                                                                                                                                               |
| Event ban                                                         | 2020-03-13  | 16 out of 16       | Brandenburg                | <a href="https://twitter.com/StM_Klose/status/1238028608469336070">https://twitter.com/StM_Klose/status/1238028608469336070</a>                                                                                                                                                                                                               |
| Event ban                                                         | 2020-03-13  | 16 out of 16       | Hesse                      | <a href="https://twitter.com/StM_Klose/status/1238028608469336070">https://twitter.com/StM_Klose/status/1238028608469336070</a>                                                                                                                                                                                                               |
| Event ban                                                         | 2020-03-13  | 16 out of 16       | Mecklenburg-<br>Vorpommern | <a href="https://twitter.com/StM_Klose/status/1238028608469336070">https://twitter.com/StM_Klose/status/1238028608469336070</a>                                                                                                                                                                                                               |
| Event ban                                                         | 2020-03-13  | 16 out of 16       | Rhineland- Palatinate      | <a href="https://twitter.com/StM_Klose/status/1238028608469336070">https://twitter.com/StM_Klose/status/1238028608469336070</a>                                                                                                                                                                                                               |
| Event ban                                                         | 2020-03-13  | 16 out of 16       | Saarland                   | <a href="https://twitter.com/StM_Klose/status/1238028608469336070">https://twitter.com/StM_Klose/status/1238028608469336070</a>                                                                                                                                                                                                               |
| Event ban                                                         | 2020-03-13  | 16 out of 16       | Saxony                     | <a href="https://twitter.com/StM_Klose/status/1238028608469336070">https://twitter.com/StM_Klose/status/1238028608469336070</a>                                                                                                                                                                                                               |
| Event ban                                                         | 2020-03-13  | 16 out of 16       | Saxony- Anhalt             | <a href="https://twitter.com/StM_Klose/status/1238028608469336070">https://twitter.com/StM_Klose/status/1238028608469336070</a>                                                                                                                                                                                                               |
| <b>NPI</b>                                                        | <b>Date</b> | <b># Effective</b> | <b>Region</b>              | <b>Source</b>                                                                                                                                                                                                                                                                                                                                 |
| Gathering ban                                                     | 2020-03-14  | 1 out of 16        | Berlin                     | <a href="https://www.reuters.com/article/us-health-coronavirus-germany/berlin-joins-cologne-in-closing-bars-clubs-as-germany-toughens-coronavirus-response-idUSKBN2110LS">https://www.reuters.com/article/us-health-coronavirus-germany/berlin-joins-cologne-in-closing-bars-clubs-as-germany-toughens-coronavirus-response-idUSKBN2110LS</a> |

|                                                                   |            |              |                            |                                                                                                                                                                                                                                                                                                                           |
|-------------------------------------------------------------------|------------|--------------|----------------------------|---------------------------------------------------------------------------------------------------------------------------------------------------------------------------------------------------------------------------------------------------------------------------------------------------------------------------|
| Gathering ban                                                     | 2020-03-17 | 2 out of 16  | Bavaria                    | <a href="https://www.reuters.com/article/us-health-coronavirus-germany-economy/merkel-says-lets-get-through-this-as-shops-bars-and-churches-shut-idUSKBN213178">https://www.reuters.com/article/us-health-coronavirus-germany-economy/merkel-says-lets-get-through-this-as-shops-bars-and-churches-shut-idUSKBN213178</a> |
| <i>NPI implemented in two thirds of the regions by 2020-03-23</i> |            |              |                            |                                                                                                                                                                                                                                                                                                                           |
| Gathering ban                                                     | 2020-03-23 | 16 out of 16 | Baden- Wuerttemberg        | <a href="https://www.bundesregierung.de/breg-de/themen/coronavirus/faqs-neue-leitlinien-1733416">https://www.bundesregierung.de/breg-de/themen/coronavirus/faqs-neue-leitlinien-1733416</a>                                                                                                                               |
| Gathering ban                                                     | 2020-03-23 | 16 out of 16 | Brandenburg                | <a href="https://www.bundesregierung.de/breg-de/themen/coronavirus/faqs-neue-leitlinien-1733416">https://www.bundesregierung.de/breg-de/themen/coronavirus/faqs-neue-leitlinien-1733416</a>                                                                                                                               |
| Gathering ban                                                     | 2020-03-23 | 16 out of 16 | Bremen                     | <a href="https://www.bundesregierung.de/breg-de/themen/coronavirus/faqs-neue-leitlinien-1733416">https://www.bundesregierung.de/breg-de/themen/coronavirus/faqs-neue-leitlinien-1733416</a>                                                                                                                               |
| Gathering ban                                                     | 2020-03-23 | 16 out of 16 | Hamburg                    | <a href="https://www.bundesregierung.de/breg-de/themen/coronavirus/faqs-neue-leitlinien-1733416">https://www.bundesregierung.de/breg-de/themen/coronavirus/faqs-neue-leitlinien-1733416</a>                                                                                                                               |
| Gathering ban                                                     | 2020-03-23 | 16 out of 16 | Hesse                      | <a href="https://www.bundesregierung.de/breg-de/themen/coronavirus/faqs-neue-leitlinien-1733416">https://www.bundesregierung.de/breg-de/themen/coronavirus/faqs-neue-leitlinien-1733416</a>                                                                                                                               |
| Gathering ban                                                     | 2020-03-23 | 16 out of 16 | Lower Saxony               | <a href="https://www.bundesregierung.de/breg-de/themen/coronavirus/faqs-neue-leitlinien-1733416">https://www.bundesregierung.de/breg-de/themen/coronavirus/faqs-neue-leitlinien-1733416</a>                                                                                                                               |
| Gathering ban                                                     | 2020-03-23 | 16 out of 16 | Mecklenburg-<br>Vorpommern | <a href="https://www.bundesregierung.de/breg-de/themen/coronavirus/faqs-neue-leitlinien-1733416">https://www.bundesregierung.de/breg-de/themen/coronavirus/faqs-neue-leitlinien-1733416</a>                                                                                                                               |
| Gathering ban                                                     | 2020-03-23 | 16 out of 16 | North Rhine- Westphalia    | <a href="https://www.bundesregierung.de/breg-de/themen/coronavirus/faqs-neue-leitlinien-1733416">https://www.bundesregierung.de/breg-de/themen/coronavirus/faqs-neue-leitlinien-1733416</a>                                                                                                                               |
| Gathering ban                                                     | 2020-03-23 | 16 out of 16 | Rhineland- Palatinate      | <a href="https://www.bundesregierung.de/breg-de/themen/coronavirus/faqs-neue-leitlinien-1733416">https://www.bundesregierung.de/breg-de/themen/coronavirus/faqs-neue-leitlinien-1733416</a>                                                                                                                               |
| Gathering ban                                                     | 2020-03-23 | 16 out of 16 | Saarland                   | <a href="https://www.bundesregierung.de/breg-de/themen/coronavirus/faqs-neue-leitlinien-1733416">https://www.bundesregierung.de/breg-de/themen/coronavirus/faqs-neue-leitlinien-1733416</a>                                                                                                                               |
| Gathering ban                                                     | 2020-03-23 | 16 out of 16 | Saxony                     | <a href="https://www.bundesregierung.de/breg-de/themen/coronavirus/faqs-neue-leitlinien-1733416">https://www.bundesregierung.de/breg-de/themen/coronavirus/faqs-neue-leitlinien-1733416</a>                                                                                                                               |
| Gathering ban                                                     | 2020-03-23 | 16 out of 16 | Saxony- Anhalt             | <a href="https://www.bundesregierung.de/breg-de/themen/coronavirus/faqs-neue-leitlinien-1733416">https://www.bundesregierung.de/breg-de/themen/coronavirus/faqs-neue-leitlinien-1733416</a>                                                                                                                               |
| Gathering ban                                                     | 2020-03-23 | 16 out of 16 | Schleswig- Holstein        | <a href="https://www.bundesregierung.de/breg-de/themen/coronavirus/faqs-neue-leitlinien-1733416">https://www.bundesregierung.de/breg-de/themen/coronavirus/faqs-neue-leitlinien-1733416</a>                                                                                                                               |
| Gathering ban                                                     | 2020-03-23 | 16 out of 16 | Thuringia                  | <a href="https://www.bundesregierung.de/breg-de/themen/coronavirus/faqs-neue-leitlinien-1733416">https://www.bundesregierung.de/breg-de/themen/coronavirus/faqs-neue-leitlinien-1733416</a>                                                                                                                               |

61

| <b>NPI</b>                                                        | <b>Date</b> | <b># Effective</b> | <b>Region</b> | <b>Source</b>                                                                                                                                                                                                                                               |
|-------------------------------------------------------------------|-------------|--------------------|---------------|-------------------------------------------------------------------------------------------------------------------------------------------------------------------------------------------------------------------------------------------------------------|
| <i>NPI implemented in two thirds of the regions by 2020-03-16</i> |             |                    |               |                                                                                                                                                                                                                                                             |
| School closure                                                    | 2020-03-16  | 13 out of 16       | Bavaria       | <a href="https://www.spiegel.de/international/germany/the-shutdown-begins-across-germany-a-3c541d1d-1d42-4672-9fdc-af6c3247df76">https://www.spiegel.de/international/germany/the-shutdown-begins-across-germany-a-3c541d1d-1d42-4672-9fdc-af6c3247df76</a> |

| School closure | 2020-03-16  | 13 out of 16       | Berlin                  | <a href="https://www.spiegel.de/international/germany/the-shutdown-begins-across-germany-a-3c541d1d-1d42-4672-9fdc-af6c3247df76">https://www.spiegel.de/international/germany/the-shutdown-begins-across-germany-a-3c541d1d-1d42-4672-9fdc-af6c3247df76</a>                                                                                   |
|----------------|-------------|--------------------|-------------------------|-----------------------------------------------------------------------------------------------------------------------------------------------------------------------------------------------------------------------------------------------------------------------------------------------------------------------------------------------|
| School closure | 2020-03-16  | 13 out of 16       | Bremen                  | <a href="https://www.spiegel.de/international/germany/the-shutdown-begins-across-germany-a-3c541d1d-1d42-4672-9fdc-af6c3247df76">https://www.spiegel.de/international/germany/the-shutdown-begins-across-germany-a-3c541d1d-1d42-4672-9fdc-af6c3247df76</a>                                                                                   |
| School closure | 2020-03-16  | 13 out of 16       | Hamburg                 | <a href="https://www.spiegel.de/international/germany/the-shutdown-begins-across-germany-a-3c541d1d-1d42-4672-9fdc-af6c3247df76">https://www.spiegel.de/international/germany/the-shutdown-begins-across-germany-a-3c541d1d-1d42-4672-9fdc-af6c3247df76</a>                                                                                   |
| School closure | 2020-03-16  | 13 out of 16       | Hesse                   | <a href="https://www.spiegel.de/international/germany/the-shutdown-begins-across-germany-a-3c541d1d-1d42-4672-9fdc-af6c3247df76">https://www.spiegel.de/international/germany/the-shutdown-begins-across-germany-a-3c541d1d-1d42-4672-9fdc-af6c3247df76</a>                                                                                   |
| School closure | 2020-03-16  | 13 out of 16       | Lower Saxony            | <a href="https://www.spiegel.de/international/germany/the-shutdown-begins-across-germany-a-3c541d1d-1d42-4672-9fdc-af6c3247df76">https://www.spiegel.de/international/germany/the-shutdown-begins-across-germany-a-3c541d1d-1d42-4672-9fdc-af6c3247df76</a>                                                                                   |
| School closure | 2020-03-16  | 13 out of 16       | Mecklenburg-Vorpommern  | <a href="https://www.spiegel.de/international/germany/the-shutdown-begins-across-germany-a-3c541d1d-1d42-4672-9fdc-af6c3247df76">https://www.spiegel.de/international/germany/the-shutdown-begins-across-germany-a-3c541d1d-1d42-4672-9fdc-af6c3247df76</a>                                                                                   |
| School closure | 2020-03-16  | 13 out of 16       | North Rhine- Westphalia | <a href="https://www.spiegel.de/international/germany/the-shutdown-begins-across-germany-a-3c541d1d-1d42-4672-9fdc-af6c3247df76">https://www.spiegel.de/international/germany/the-shutdown-begins-across-germany-a-3c541d1d-1d42-4672-9fdc-af6c3247df76</a>                                                                                   |
| School closure | 2020-03-16  | 13 out of 16       | Rhineland- Palatinate   | <a href="https://www.spiegel.de/international/germany/the-shutdown-begins-across-germany-a-3c541d1d-1d42-4672-9fdc-af6c3247df76">https://www.spiegel.de/international/germany/the-shutdown-begins-across-germany-a-3c541d1d-1d42-4672-9fdc-af6c3247df76</a>                                                                                   |
| School closure | 2020-03-16  | 13 out of 16       | Saarland                | <a href="https://www.spiegel.de/international/germany/the-shutdown-begins-across-germany-a-3c541d1d-1d42-4672-9fdc-af6c3247df76">https://www.spiegel.de/international/germany/the-shutdown-begins-across-germany-a-3c541d1d-1d42-4672-9fdc-af6c3247df76</a>                                                                                   |
| School closure | 2020-03-16  | 13 out of 16       | Saxony                  | <a href="https://www.spiegel.de/international/germany/germany-states-move-to-close-educational-and-daycare-facilities-a-e9c13296-002b-484b-88bc-e14ea295ff10">https://www.spiegel.de/international/germany/germany-states-move-to-close-educational-and-daycare-facilities-a-e9c13296-002b-484b-88bc-e14ea295ff10</a>                         |
| School closure | 2020-03-16  | 13 out of 16       | Saxony- Anhalt          | <a href="https://www.spiegel.de/international/germany/the-shutdown-begins-across-germany-a-3c541d1d-1d42-4672-9fdc-af6c3247df76">https://www.spiegel.de/international/germany/the-shutdown-begins-across-germany-a-3c541d1d-1d42-4672-9fdc-af6c3247df76</a>                                                                                   |
| School closure | 2020-03-16  | 13 out of 16       | Schleswig- Holstein     | <a href="https://www.spiegel.de/international/germany/the-shutdown-begins-across-germany-a-3c541d1d-1d42-4672-9fdc-af6c3247df76">https://www.spiegel.de/international/germany/the-shutdown-begins-across-germany-a-3c541d1d-1d42-4672-9fdc-af6c3247df76</a>                                                                                   |
| School closure | 2020-03-17  | 15 out of 16       | Baden- Wuerttemberg     | <a href="https://www.spiegel.de/international/germany/the-shutdown-begins-across-germany-a-3c541d1d-1d42-4672-9fdc-af6c3247df76">https://www.spiegel.de/international/germany/the-shutdown-begins-across-germany-a-3c541d1d-1d42-4672-9fdc-af6c3247df76</a>                                                                                   |
| School closure | 2020-03-17  | 15 out of 16       | Thuringia               | <a href="https://www.spiegel.de/international/germany/the-shutdown-begins-across-germany-a-3c541d1d-1d42-4672-9fdc-af6c3247df76">https://www.spiegel.de/international/germany/the-shutdown-begins-across-germany-a-3c541d1d-1d42-4672-9fdc-af6c3247df76</a>                                                                                   |
| School closure | 2020-03-18  | 16 out of 16       | Brandenburg             | <a href="https://www.spiegel.de/international/germany/the-shutdown-begins-across-germany-a-3c541d1d-1d42-4672-9fdc-af6c3247df76">https://www.spiegel.de/international/germany/the-shutdown-begins-across-germany-a-3c541d1d-1d42-4672-9fdc-af6c3247df76</a>                                                                                   |
| <b>NPI</b>     | <b>Date</b> | <b># Effective</b> | <b>Region</b>           | <b>Source</b>                                                                                                                                                                                                                                                                                                                                 |
| Venue closure  | 2020-03-14  | 2 out of 16        | Berlin                  | <a href="https://www.reuters.com/article/us-health-coronavirus-germany/berlin-joins-cologne-in-closing-bars-clubs-as-germany-toughens-coronavirus-response-idUSKBN2110LS">https://www.reuters.com/article/us-health-coronavirus-germany/berlin-joins-cologne-in-closing-bars-clubs-as-germany-toughens-coronavirus-response-idUSKBN2110LS</a> |

|               |            |             |          |                                                                                                                                                                                                                                                                                                                                               |
|---------------|------------|-------------|----------|-----------------------------------------------------------------------------------------------------------------------------------------------------------------------------------------------------------------------------------------------------------------------------------------------------------------------------------------------|
| Venue closure | 2020-03-14 | 2 out of 16 | Saarland | <a href="https://www.reuters.com/article/us-health-coronavirus-germany/berlin-joins-cologne-in-closing-bars-clubs-as-germany-toughens-coronavirus-response-idUSKBN2110LS">https://www.reuters.com/article/us-health-coronavirus-germany/berlin-joins-cologne-in-closing-bars-clubs-as-germany-toughens-coronavirus-response-idUSKBN2110LS</a> |
|---------------|------------|-------------|----------|-----------------------------------------------------------------------------------------------------------------------------------------------------------------------------------------------------------------------------------------------------------------------------------------------------------------------------------------------|

*NPI implemented in two thirds of the regions by 2020-03-16*

|               |            |              |                         |                                                                                                                                                                                                   |
|---------------|------------|--------------|-------------------------|---------------------------------------------------------------------------------------------------------------------------------------------------------------------------------------------------|
| Venue closure | 2020-03-16 | 16 out of 16 | Baden- Wuerttemberg     | <a href="https://www.bundesregierung.de/breg-de/themen/coronavirus/leitlinien-bund-laender-1731000">https://www.bundesregierung.de/breg-de/themen/coronavirus/leitlinien-bund-laender-1731000</a> |
| Venue closure | 2020-03-16 | 16 out of 16 | Bavaria                 | <a href="https://www.bundesregierung.de/breg-de/themen/coronavirus/leitlinien-bund-laender-1731000">https://www.bundesregierung.de/breg-de/themen/coronavirus/leitlinien-bund-laender-1731000</a> |
| Venue closure | 2020-03-16 | 16 out of 16 | Brandenburg             | <a href="https://www.bundesregierung.de/breg-de/themen/coronavirus/leitlinien-bund-laender-1731000">https://www.bundesregierung.de/breg-de/themen/coronavirus/leitlinien-bund-laender-1731000</a> |
| Venue closure | 2020-03-16 | 16 out of 16 | Bremen                  | <a href="https://www.bundesregierung.de/breg-de/themen/coronavirus/leitlinien-bund-laender-1731000">https://www.bundesregierung.de/breg-de/themen/coronavirus/leitlinien-bund-laender-1731000</a> |
| Venue closure | 2020-03-16 | 16 out of 16 | Hamburg                 | <a href="https://www.bundesregierung.de/breg-de/themen/coronavirus/leitlinien-bund-laender-1731000">https://www.bundesregierung.de/breg-de/themen/coronavirus/leitlinien-bund-laender-1731000</a> |
| Venue closure | 2020-03-16 | 16 out of 16 | Hesse                   | <a href="https://www.bundesregierung.de/breg-de/themen/coronavirus/leitlinien-bund-laender-1731000">https://www.bundesregierung.de/breg-de/themen/coronavirus/leitlinien-bund-laender-1731000</a> |
| Venue closure | 2020-03-16 | 16 out of 16 | Lower Saxony            | <a href="https://www.bundesregierung.de/breg-de/themen/coronavirus/leitlinien-bund-laender-1731000">https://www.bundesregierung.de/breg-de/themen/coronavirus/leitlinien-bund-laender-1731000</a> |
| Venue closure | 2020-03-16 | 16 out of 16 | Mecklenburg-Vorpommern  | <a href="https://www.bundesregierung.de/breg-de/themen/coronavirus/leitlinien-bund-laender-1731000">https://www.bundesregierung.de/breg-de/themen/coronavirus/leitlinien-bund-laender-1731000</a> |
| Venue closure | 2020-03-16 | 16 out of 16 | North Rhine- Westphalia | <a href="https://www.bundesregierung.de/breg-de/themen/coronavirus/leitlinien-bund-laender-1731000">https://www.bundesregierung.de/breg-de/themen/coronavirus/leitlinien-bund-laender-1731000</a> |
| Venue closure | 2020-03-16 | 16 out of 16 | Rhineland- Palatinate   | <a href="https://www.bundesregierung.de/breg-de/themen/coronavirus/leitlinien-bund-laender-1731000">https://www.bundesregierung.de/breg-de/themen/coronavirus/leitlinien-bund-laender-1731000</a> |
| Venue closure | 2020-03-16 | 16 out of 16 | Saxony                  | <a href="https://www.bundesregierung.de/breg-de/themen/coronavirus/leitlinien-bund-laender-1731000">https://www.bundesregierung.de/breg-de/themen/coronavirus/leitlinien-bund-laender-1731000</a> |
| Venue closure | 2020-03-16 | 16 out of 16 | Saxony- Anhalt          | <a href="https://www.bundesregierung.de/breg-de/themen/coronavirus/leitlinien-bund-laender-1731000">https://www.bundesregierung.de/breg-de/themen/coronavirus/leitlinien-bund-laender-1731000</a> |
| Venue closure | 2020-03-16 | 16 out of 16 | Schleswig- Holstein     | <a href="https://www.bundesregierung.de/breg-de/themen/coronavirus/leitlinien-bund-laender-1731000">https://www.bundesregierung.de/breg-de/themen/coronavirus/leitlinien-bund-laender-1731000</a> |
| Venue closure | 2020-03-16 | 16 out of 16 | Thuringia               | <a href="https://www.bundesregierung.de/breg-de/themen/coronavirus/leitlinien-bund-laender-1731000">https://www.bundesregierung.de/breg-de/themen/coronavirus/leitlinien-bund-laender-1731000</a> |

| <b>NPI</b> | <b>Date</b> | <b># Effective</b> | <b>Region</b> | <b>Source</b>                                                                                                   |
|------------|-------------|--------------------|---------------|-----------------------------------------------------------------------------------------------------------------|
| Lockdown   | 2020-03-21  | 1 out of 16        | Bavaria       | <a href="https://www.corona-katastrophenschutz.bayern.de/">https://www.corona-katastrophenschutz.bayern.de/</a> |

*Two-thirds quota not reached; NPI not implemented on national level*

| <b>NPI</b> | <b>Date</b>                         | <b># Effective</b> | <b>Region</b> | <b>Source</b> |
|------------|-------------------------------------|--------------------|---------------|---------------|
| Work ban   | <i>NPI implemented in no region</i> |                    |               |               |

Table 8: Sources for policies implemented across different German regions



| <b>NPI</b>                                                        | <b>Date</b> | <b># Effective</b> | <b>Region</b>       | <b>Source</b>                                                                                                                                                                                                                                                                                                                                       |
|-------------------------------------------------------------------|-------------|--------------------|---------------------|-----------------------------------------------------------------------------------------------------------------------------------------------------------------------------------------------------------------------------------------------------------------------------------------------------------------------------------------------------|
| Event ban                                                         | 2020-03-10  | 2 out of 17        | Community of Madrid | <a href="https://www.eldiario.es/sociedad/Sanidad-consejo-ministros-medidas_0_1004400105.html">https://www.eldiario.es/sociedad/Sanidad-consejo-ministros-medidas_0_1004400105.html</a>                                                                                                                                                             |
| Event ban                                                         | 2020-03-10  | 2 out of 17        | La Rioja            | <a href="https://www.eldiario.es/sociedad/Sanidad-consejo-ministros-medidas_0_1004400105.html">https://www.eldiario.es/sociedad/Sanidad-consejo-ministros-medidas_0_1004400105.html</a>                                                                                                                                                             |
| Event ban                                                         | 2020-03-12  | 3 out of 17        | Catalonia           | <a href="https://www.catalannews.com/society-science/item/catalonia-bans-events-of-over-1000-people-in-efforts-to-control-coronavirus">https://www.catalannews.com/society-science/item/catalonia-bans-events-of-over-1000-people-in-efforts-to-control-coronavirus</a>                                                                             |
| <i>NPI implemented in two thirds of the regions by 2020-03-13</i> |             |                    |                     |                                                                                                                                                                                                                                                                                                                                                     |
| Event ban                                                         | 2020-03-13  | 17 out of 17       | Andalusia           | <a href="https://elpais.com/sociedad/2020-03-12/el-gobierno-extiende-a-toda-espana-la-recomendacion-de-cancelar-clases-y-celebrar-eventos-masivos-en-espacios-cerrados.html">https://elpais.com/sociedad/2020-03-12/el-gobierno-extiende-a-toda-espana-la-recomendacion-de-cancelar-clases-y-celebrar-eventos-masivos-en-espacios-cerrados.html</a> |
| Event ban                                                         | 2020-03-13  | 17 out of 17       | Aragon              | <a href="https://elpais.com/sociedad/2020-03-12/el-gobierno-extiende-a-toda-espana-la-recomendacion-de-cancelar-clases-y-celebrar-eventos-masivos-en-espacios-cerrados.html">https://elpais.com/sociedad/2020-03-12/el-gobierno-extiende-a-toda-espana-la-recomendacion-de-cancelar-clases-y-celebrar-eventos-masivos-en-espacios-cerrados.html</a> |
| Event ban                                                         | 2020-03-13  | 17 out of 17       | Asturias            | <a href="https://elpais.com/sociedad/2020-03-12/el-gobierno-extiende-a-toda-espana-la-recomendacion-de-cancelar-clases-y-celebrar-eventos-masivos-en-espacios-cerrados.html">https://elpais.com/sociedad/2020-03-12/el-gobierno-extiende-a-toda-espana-la-recomendacion-de-cancelar-clases-y-celebrar-eventos-masivos-en-espacios-cerrados.html</a> |
| Event ban                                                         | 2020-03-13  | 17 out of 17       | Balearic Islands    | <a href="https://elpais.com/sociedad/2020-03-12/el-gobierno-extiende-a-toda-espana-la-recomendacion-de-cancelar-clases-y-celebrar-eventos-masivos-en-espacios-cerrados.html">https://elpais.com/sociedad/2020-03-12/el-gobierno-extiende-a-toda-espana-la-recomendacion-de-cancelar-clases-y-celebrar-eventos-masivos-en-espacios-cerrados.html</a> |
| Event ban                                                         | 2020-03-13  | 17 out of 17       | Basque Country      | <a href="https://elpais.com/sociedad/2020-03-12/el-gobierno-extiende-a-toda-espana-la-recomendacion-de-cancelar-clases-y-celebrar-eventos-masivos-en-espacios-cerrados.html">https://elpais.com/sociedad/2020-03-12/el-gobierno-extiende-a-toda-espana-la-recomendacion-de-cancelar-clases-y-celebrar-eventos-masivos-en-espacios-cerrados.html</a> |
| Event ban                                                         | 2020-03-13  | 17 out of 17       | Canary Islands      | <a href="https://elpais.com/sociedad/2020-03-12/el-gobierno-extiende-a-toda-espana-la-recomendacion-de-cancelar-clases-y-celebrar-eventos-masivos-en-espacios-cerrados.html">https://elpais.com/sociedad/2020-03-12/el-gobierno-extiende-a-toda-espana-la-recomendacion-de-cancelar-clases-y-celebrar-eventos-masivos-en-espacios-cerrados.html</a> |
| Event ban                                                         | 2020-03-13  | 17 out of 17       | Cantabria           | <a href="https://elpais.com/sociedad/2020-03-12/el-gobierno-extiende-a-toda-espana-la-recomendacion-de-cancelar-clases-y-celebrar-eventos-masivos-en-espacios-cerrados.html">https://elpais.com/sociedad/2020-03-12/el-gobierno-extiende-a-toda-espana-la-recomendacion-de-cancelar-clases-y-celebrar-eventos-masivos-en-espacios-cerrados.html</a> |
| Event ban                                                         | 2020-03-13  | 17 out of 17       | Castille and Leon   | <a href="https://elpais.com/sociedad/2020-03-12/el-gobierno-extiende-a-toda-espana-la-recomendacion-de-cancelar-clases-y-celebrar-eventos-masivos-en-espacios-cerrados.html">https://elpais.com/sociedad/2020-03-12/el-gobierno-extiende-a-toda-espana-la-recomendacion-de-cancelar-clases-y-celebrar-eventos-masivos-en-espacios-cerrados.html</a> |
| Event ban                                                         | 2020-03-13  | 17 out of 17       | Castille- La Mancha | <a href="https://elpais.com/sociedad/2020-03-12/el-gobierno-extiende-a-toda-espana-la-recomendacion-de-cancelar-clases-y-celebrar-eventos-masivos-en-espacios-cerrados.html">https://elpais.com/sociedad/2020-03-12/el-gobierno-extiende-a-toda-espana-la-recomendacion-de-cancelar-clases-y-celebrar-eventos-masivos-en-espacios-cerrados.html</a> |

|           |            |              |                     |                                                                                                                                                                                                                                                                                                                                                     |
|-----------|------------|--------------|---------------------|-----------------------------------------------------------------------------------------------------------------------------------------------------------------------------------------------------------------------------------------------------------------------------------------------------------------------------------------------------|
| Event ban | 2020-03-13 | 17 out of 17 | Extremadura         | <a href="https://elpais.com/sociedad/2020-03-12/el-gobierno-extiende-a-toda-espana-la-recomendacion-de-cancelar-clases-y-celebrar-eventos-masivos-en-espacios-cerrados.html">https://elpais.com/sociedad/2020-03-12/el-gobierno-extiende-a-toda-espana-la-recomendacion-de-cancelar-clases-y-celebrar-eventos-masivos-en-espacios-cerrados.html</a> |
| Event ban | 2020-03-13 | 17 out of 17 | Galicia             | <a href="https://elpais.com/sociedad/2020-03-12/el-gobierno-extiende-a-toda-espana-la-recomendacion-de-cancelar-clases-y-celebrar-eventos-masivos-en-espacios-cerrados.html">https://elpais.com/sociedad/2020-03-12/el-gobierno-extiende-a-toda-espana-la-recomendacion-de-cancelar-clases-y-celebrar-eventos-masivos-en-espacios-cerrados.html</a> |
| Event ban | 2020-03-13 | 17 out of 17 | Navarre             | <a href="https://elpais.com/sociedad/2020-03-12/el-gobierno-extiende-a-toda-espana-la-recomendacion-de-cancelar-clases-y-celebrar-eventos-masivos-en-espacios-cerrados.html">https://elpais.com/sociedad/2020-03-12/el-gobierno-extiende-a-toda-espana-la-recomendacion-de-cancelar-clases-y-celebrar-eventos-masivos-en-espacios-cerrados.html</a> |
| Event ban | 2020-03-13 | 17 out of 17 | Region of Murcia    | <a href="https://elpais.com/sociedad/2020-03-12/el-gobierno-extiende-a-toda-espana-la-recomendacion-de-cancelar-clases-y-celebrar-eventos-masivos-en-espacios-cerrados.html">https://elpais.com/sociedad/2020-03-12/el-gobierno-extiende-a-toda-espana-la-recomendacion-de-cancelar-clases-y-celebrar-eventos-masivos-en-espacios-cerrados.html</a> |
| Event ban | 2020-03-13 | 17 out of 17 | Valencian Community | <a href="https://elpais.com/sociedad/2020-03-12/el-gobierno-extiende-a-toda-espana-la-recomendacion-de-cancelar-clases-y-celebrar-eventos-masivos-en-espacios-cerrados.html">https://elpais.com/sociedad/2020-03-12/el-gobierno-extiende-a-toda-espana-la-recomendacion-de-cancelar-clases-y-celebrar-eventos-masivos-en-espacios-cerrados.html</a> |

| <b>NPI</b>                                                        | <b>Date</b> | <b># Effective</b> | <b>Region</b>       | <b>Source</b>                                                                                                                                                                                   |
|-------------------------------------------------------------------|-------------|--------------------|---------------------|-------------------------------------------------------------------------------------------------------------------------------------------------------------------------------------------------|
| <i>NPI implemented in two thirds of the regions by 2020-03-15</i> |             |                    |                     |                                                                                                                                                                                                 |
| Gathering ban                                                     | 2020-03-15  | 17 out of 17       | Andalusia           | <a href="https://www.cnn.com/2020/03/14/spain-declares-state-of-emergency-due-to-coronavirus.html">https://www.cnn.com/2020/03/14/spain-declares-state-of-emergency-due-to-coronavirus.html</a> |
| Gathering ban                                                     | 2020-03-15  | 17 out of 17       | Aragon              | <a href="https://www.cnn.com/2020/03/14/spain-declares-state-of-emergency-due-to-coronavirus.html">https://www.cnn.com/2020/03/14/spain-declares-state-of-emergency-due-to-coronavirus.html</a> |
| Gathering ban                                                     | 2020-03-15  | 17 out of 17       | Asturias            | <a href="https://www.cnn.com/2020/03/14/spain-declares-state-of-emergency-due-to-coronavirus.html">https://www.cnn.com/2020/03/14/spain-declares-state-of-emergency-due-to-coronavirus.html</a> |
| Gathering ban                                                     | 2020-03-15  | 17 out of 17       | Balearic Islands    | <a href="https://www.cnn.com/2020/03/14/spain-declares-state-of-emergency-due-to-coronavirus.html">https://www.cnn.com/2020/03/14/spain-declares-state-of-emergency-due-to-coronavirus.html</a> |
| Gathering ban                                                     | 2020-03-15  | 17 out of 17       | Basque Country      | <a href="https://www.cnn.com/2020/03/14/spain-declares-state-of-emergency-due-to-coronavirus.html">https://www.cnn.com/2020/03/14/spain-declares-state-of-emergency-due-to-coronavirus.html</a> |
| Gathering ban                                                     | 2020-03-15  | 17 out of 17       | Canary Islands      | <a href="https://www.cnn.com/2020/03/14/spain-declares-state-of-emergency-due-to-coronavirus.html">https://www.cnn.com/2020/03/14/spain-declares-state-of-emergency-due-to-coronavirus.html</a> |
| Gathering ban                                                     | 2020-03-15  | 17 out of 17       | Cantabria           | <a href="https://www.cnn.com/2020/03/14/spain-declares-state-of-emergency-due-to-coronavirus.html">https://www.cnn.com/2020/03/14/spain-declares-state-of-emergency-due-to-coronavirus.html</a> |
| Gathering ban                                                     | 2020-03-15  | 17 out of 17       | Castille and Leon   | <a href="https://www.cnn.com/2020/03/14/spain-declares-state-of-emergency-due-to-coronavirus.html">https://www.cnn.com/2020/03/14/spain-declares-state-of-emergency-due-to-coronavirus.html</a> |
| Gathering ban                                                     | 2020-03-15  | 17 out of 17       | Castille- La Mancha | <a href="https://www.cnn.com/2020/03/14/spain-declares-state-of-emergency-due-to-coronavirus.html">https://www.cnn.com/2020/03/14/spain-declares-state-of-emergency-due-to-coronavirus.html</a> |

| Gathering ban                                                     | 2020-03-15  | 17 out of 17       | Catalonia           | <a href="https://www.cnbc.com/2020/03/14/spain-declares-state-of-emergency-due-to-coronavirus.html">https://www.cnbc.com/2020/03/14/spain-declares-state-of-emergency-due-to-coronavirus.html</a>                                                                         |
|-------------------------------------------------------------------|-------------|--------------------|---------------------|---------------------------------------------------------------------------------------------------------------------------------------------------------------------------------------------------------------------------------------------------------------------------|
| Gathering ban                                                     | 2020-03-15  | 17 out of 17       | Community of Madrid | <a href="https://www.cnbc.com/2020/03/14/spain-declares-state-of-emergency-due-to-coronavirus.html">https://www.cnbc.com/2020/03/14/spain-declares-state-of-emergency-due-to-coronavirus.html</a>                                                                         |
| Gathering ban                                                     | 2020-03-15  | 17 out of 17       | Extremadura         | <a href="https://www.cnbc.com/2020/03/14/spain-declares-state-of-emergency-due-to-coronavirus.html">https://www.cnbc.com/2020/03/14/spain-declares-state-of-emergency-due-to-coronavirus.html</a>                                                                         |
| Gathering ban                                                     | 2020-03-15  | 17 out of 17       | Galicia             | <a href="https://www.cnbc.com/2020/03/14/spain-declares-state-of-emergency-due-to-coronavirus.html">https://www.cnbc.com/2020/03/14/spain-declares-state-of-emergency-due-to-coronavirus.html</a>                                                                         |
| Gathering ban                                                     | 2020-03-15  | 17 out of 17       | La Rioja            | <a href="https://www.cnbc.com/2020/03/14/spain-declares-state-of-emergency-due-to-coronavirus.html">https://www.cnbc.com/2020/03/14/spain-declares-state-of-emergency-due-to-coronavirus.html</a>                                                                         |
| Gathering ban                                                     | 2020-03-15  | 17 out of 17       | Navarre             | <a href="https://www.cnbc.com/2020/03/14/spain-declares-state-of-emergency-due-to-coronavirus.html">https://www.cnbc.com/2020/03/14/spain-declares-state-of-emergency-due-to-coronavirus.html</a>                                                                         |
| Gathering ban                                                     | 2020-03-15  | 17 out of 17       | Region of Murcia    | <a href="https://www.cnbc.com/2020/03/14/spain-declares-state-of-emergency-due-to-coronavirus.html">https://www.cnbc.com/2020/03/14/spain-declares-state-of-emergency-due-to-coronavirus.html</a>                                                                         |
| Gathering ban                                                     | 2020-03-15  | 17 out of 17       | Valencian Community | <a href="https://www.cnbc.com/2020/03/14/spain-declares-state-of-emergency-due-to-coronavirus.html">https://www.cnbc.com/2020/03/14/spain-declares-state-of-emergency-due-to-coronavirus.html</a>                                                                         |
| <b>NPI</b>                                                        | <b>Date</b> | <b># Effective</b> | <b>Region</b>       | <b>Source</b>                                                                                                                                                                                                                                                             |
| School closure                                                    | 2020-03-11  | 2 out of 17        | Community of Madrid | <a href="https://english.elpais.com/society/2020-03-09/madrid-basque-city-close-schools-as-coronavirus-continues-spread-in-spain.html">https://english.elpais.com/society/2020-03-09/madrid-basque-city-close-schools-as-coronavirus-continues-spread-in-spain.html</a>   |
| School closure                                                    | 2020-03-11  | 2 out of 17        | La Rioja            | <a href="https://www.thestar.com.my/news/world/2020/03/10/spain039s-la-rioja-region-orders-schools-shutdown-as-coronavirus-spreads">https://www.thestar.com.my/news/world/2020/03/10/spain039s-la-rioja-region-orders-schools-shutdown-as-coronavirus-spreads</a>         |
| School closure                                                    | 2020-03-13  | 6 out of 17        | Basque Country      | <a href="https://english.elpais.com/society/2020-03-12/basque-country-galicia-and-murcia-close-schools-in-bid-to-slow-coronavirus.html">https://english.elpais.com/society/2020-03-12/basque-country-galicia-and-murcia-close-schools-in-bid-to-slow-coronavirus.html</a> |
| School closure                                                    | 2020-03-13  | 6 out of 17        | Canary Islands      | <a href="https://english.elpais.com/society/2020-03-12/basque-country-galicia-and-murcia-close-schools-in-bid-to-slow-coronavirus.html">https://english.elpais.com/society/2020-03-12/basque-country-galicia-and-murcia-close-schools-in-bid-to-slow-coronavirus.html</a> |
| School closure                                                    | 2020-03-13  | 6 out of 17        | Catalonia           | <a href="https://english.elpais.com/society/2020-03-12/basque-country-galicia-and-murcia-close-schools-in-bid-to-slow-coronavirus.html">https://english.elpais.com/society/2020-03-12/basque-country-galicia-and-murcia-close-schools-in-bid-to-slow-coronavirus.html</a> |
| School closure                                                    | 2020-03-13  | 6 out of 17        | Galicia             | <a href="https://english.elpais.com/society/2020-03-12/basque-country-galicia-and-murcia-close-schools-in-bid-to-slow-coronavirus.html">https://english.elpais.com/society/2020-03-12/basque-country-galicia-and-murcia-close-schools-in-bid-to-slow-coronavirus.html</a> |
| <i>NPI implemented in two thirds of the regions by 2020-03-16</i> |             |                    |                     |                                                                                                                                                                                                                                                                           |
| School closure                                                    | 2020-03-16  | 17 out of 17       | Andalusia           | <a href="https://english.elpais.com/society/2020-03-12/basque-country-galicia-and-murcia-close-schools-in-bid-to-slow-coronavirus.html">https://english.elpais.com/society/2020-03-12/basque-country-galicia-and-murcia-close-schools-in-bid-to-slow-coronavirus.html</a> |
| School closure                                                    | 2020-03-16  | 17 out of 17       | Aragon              | <a href="https://english.elpais.com/society/2020-03-12/basque-country-galicia-and-murcia-close-schools-in-bid-to-slow-coronavirus.html">https://english.elpais.com/society/2020-03-12/basque-country-galicia-and-murcia-close-schools-in-bid-to-slow-coronavirus.html</a> |

| School closure                                                    | 2020-03-16  | 17 out of 17       | Asturias            | <a href="https://english.elpais.com/society/2020-03-12/basque-country-galicia-and-murcia-close-schools-in-bid-to-slow-coronavirus.html">https://english.elpais.com/society/2020-03-12/basque-country-galicia-and-murcia-close-schools-in-bid-to-slow-coronavirus.html</a>                                   |
|-------------------------------------------------------------------|-------------|--------------------|---------------------|-------------------------------------------------------------------------------------------------------------------------------------------------------------------------------------------------------------------------------------------------------------------------------------------------------------|
| School closure                                                    | 2020-03-16  | 17 out of 17       | Balearic Islands    | <a href="https://english.elpais.com/society/2020-03-12/basque-country-galicia-and-murcia-close-schools-in-bid-to-slow-coronavirus.html">https://english.elpais.com/society/2020-03-12/basque-country-galicia-and-murcia-close-schools-in-bid-to-slow-coronavirus.html</a>                                   |
| School closure                                                    | 2020-03-16  | 17 out of 17       | Cantabria           | <a href="https://english.elpais.com/society/2020-03-12/basque-country-galicia-and-murcia-close-schools-in-bid-to-slow-coronavirus.html">https://english.elpais.com/society/2020-03-12/basque-country-galicia-and-murcia-close-schools-in-bid-to-slow-coronavirus.html</a>                                   |
| School closure                                                    | 2020-03-16  | 17 out of 17       | Castille and Leon   | <a href="https://english.elpais.com/society/2020-03-12/basque-country-galicia-and-murcia-close-schools-in-bid-to-slow-coronavirus.html">https://english.elpais.com/society/2020-03-12/basque-country-galicia-and-murcia-close-schools-in-bid-to-slow-coronavirus.html</a>                                   |
| School closure                                                    | 2020-03-16  | 17 out of 17       | Castille- La Mancha | <a href="https://english.elpais.com/society/2020-03-12/basque-country-galicia-and-murcia-close-schools-in-bid-to-slow-coronavirus.html">https://english.elpais.com/society/2020-03-12/basque-country-galicia-and-murcia-close-schools-in-bid-to-slow-coronavirus.html</a>                                   |
| School closure                                                    | 2020-03-16  | 17 out of 17       | Extremadura         | <a href="https://english.elpais.com/society/2020-03-12/basque-country-galicia-and-murcia-close-schools-in-bid-to-slow-coronavirus.html">https://english.elpais.com/society/2020-03-12/basque-country-galicia-and-murcia-close-schools-in-bid-to-slow-coronavirus.html</a>                                   |
| School closure                                                    | 2020-03-16  | 17 out of 17       | Navarre             | <a href="https://english.elpais.com/society/2020-03-12/basque-country-galicia-and-murcia-close-schools-in-bid-to-slow-coronavirus.html">https://english.elpais.com/society/2020-03-12/basque-country-galicia-and-murcia-close-schools-in-bid-to-slow-coronavirus.html</a>                                   |
| School closure                                                    | 2020-03-16  | 17 out of 17       | Region of Murcia    | <a href="https://english.elpais.com/society/2020-03-12/basque-country-galicia-and-murcia-close-schools-in-bid-to-slow-coronavirus.html">https://english.elpais.com/society/2020-03-12/basque-country-galicia-and-murcia-close-schools-in-bid-to-slow-coronavirus.html</a>                                   |
| School closure                                                    | 2020-03-16  | 17 out of 17       | Valencian Community | <a href="https://english.elpais.com/society/2020-03-12/basque-country-galicia-and-murcia-close-schools-in-bid-to-slow-coronavirus.html">https://english.elpais.com/society/2020-03-12/basque-country-galicia-and-murcia-close-schools-in-bid-to-slow-coronavirus.html</a>                                   |
| <b>NPI</b>                                                        | <b>Date</b> | <b># Effective</b> | <b>Region</b>       | <b>Source</b>                                                                                                                                                                                                                                                                                               |
| Venue closure                                                     | 2020-03-13  | 4 out of 17        | Cantabria           | <a href="https://www.eldiario.es/cantabria/ultima-hora/Cantabria-hosteleria-superficies-edificios-actividades_0_1005450439.html">https://www.eldiario.es/cantabria/ultima-hora/Cantabria-hosteleria-superficies-edificios-actividades_0_1005450439.html</a>                                                 |
| Venue closure                                                     | 2020-03-13  | 4 out of 17        | Castille and Leon   | <a href="https://twitter.com/FranciscoIgea/status/1238571610468220929">https://twitter.com/FranciscoIgea/status/1238571610468220929</a>                                                                                                                                                                     |
| Venue closure                                                     | 2020-03-13  | 4 out of 17        | Catalonia           | <a href="https://elpais.com/espana/catalunya/2020-03-13/cataluna-cierra-pistas-de-esqui-discotecas-y-areas-comerciales-que-no-sean-de-alimentacion.html">https://elpais.com/espana/catalunya/2020-03-13/cataluna-cierra-pistas-de-esqui-discotecas-y-areas-comerciales-que-no-sean-de-alimentacion.html</a> |
| Venue closure                                                     | 2020-03-13  | 4 out of 17        | Galicia             | <a href="https://www.nytimes.com/aponline/2020/03/14/world/europe/ap-eu-virus-outbreak-spain.html">https://www.nytimes.com/aponline/2020/03/14/world/europe/ap-eu-virus-outbreak-spain.html</a>                                                                                                             |
| Venue closure                                                     | 2020-03-14  | 7 out of 17        | Asturias            | <a href="https://cadenaser.com/emisora/2020/03/13/ser_gijon/1584138177_171951.html">https://cadenaser.com/emisora/2020/03/13/ser_gijon/1584138177_171951.html</a>                                                                                                                                           |
| Venue closure                                                     | 2020-03-14  | 7 out of 17        | Community of Madrid | <a href="https://english.elpais.com/society/2020-03-13/madrid-orders-restaurants-and-bars-to-close-from-saturday-onward-to-slow-coronavirus-spread.html">https://english.elpais.com/society/2020-03-13/madrid-orders-restaurants-and-bars-to-close-from-saturday-onward-to-slow-coronavirus-spread.html</a> |
| Venue closure                                                     | 2020-03-14  | 7 out of 17        | Valencian Community | <a href="https://english.elpais.com/society/2020-03-13/madrid-orders-restaurants-and-bars-to-close-from-saturday-onward-to-slow-coronavirus-spread.html">https://english.elpais.com/society/2020-03-13/madrid-orders-restaurants-and-bars-to-close-from-saturday-onward-to-slow-coronavirus-spread.html</a> |
| <i>NPI implemented in two thirds of the regions by 2020-03-15</i> |             |                    |                     |                                                                                                                                                                                                                                                                                                             |
| Venue closure                                                     | 2020-03-15  | 17 out of 17       | Andalusia           | <a href="https://www.cncb.com/2020/03/14/spain-declares-state-of-emergency-due-to-coronavirus.html">https://www.cncb.com/2020/03/14/spain-declares-state-of-emergency-due-to-coronavirus.html</a>                                                                                                           |

|               |            |              |                     |                                                                                                                                                                                                     |
|---------------|------------|--------------|---------------------|-----------------------------------------------------------------------------------------------------------------------------------------------------------------------------------------------------|
| Venue closure | 2020-03-15 | 17 out of 17 | Aragon              | <a href="https://www.cnbcc.com/2020/03/14/spain-declares-state-of-emergency-due-to-coronavirus.html">https://www.cnbcc.com/2020/03/14/spain-declares-state-of-emergency-due-to-coronavirus.html</a> |
| Venue closure | 2020-03-15 | 17 out of 17 | Balearic Islands    | <a href="https://www.cnbcc.com/2020/03/14/spain-declares-state-of-emergency-due-to-coronavirus.html">https://www.cnbcc.com/2020/03/14/spain-declares-state-of-emergency-due-to-coronavirus.html</a> |
| Venue closure | 2020-03-15 | 17 out of 17 | Basque Country      | <a href="https://www.cnbcc.com/2020/03/14/spain-declares-state-of-emergency-due-to-coronavirus.html">https://www.cnbcc.com/2020/03/14/spain-declares-state-of-emergency-due-to-coronavirus.html</a> |
| Venue closure | 2020-03-15 | 17 out of 17 | Canary Islands      | <a href="https://www.cnbcc.com/2020/03/14/spain-declares-state-of-emergency-due-to-coronavirus.html">https://www.cnbcc.com/2020/03/14/spain-declares-state-of-emergency-due-to-coronavirus.html</a> |
| Venue closure | 2020-03-15 | 17 out of 17 | Castille- La Mancha | <a href="https://www.cnbcc.com/2020/03/14/spain-declares-state-of-emergency-due-to-coronavirus.html">https://www.cnbcc.com/2020/03/14/spain-declares-state-of-emergency-due-to-coronavirus.html</a> |
| Venue closure | 2020-03-15 | 17 out of 17 | Extremadura         | <a href="https://www.cnbcc.com/2020/03/14/spain-declares-state-of-emergency-due-to-coronavirus.html">https://www.cnbcc.com/2020/03/14/spain-declares-state-of-emergency-due-to-coronavirus.html</a> |
| Venue closure | 2020-03-15 | 17 out of 17 | La Rioja            | <a href="https://www.cnbcc.com/2020/03/14/spain-declares-state-of-emergency-due-to-coronavirus.html">https://www.cnbcc.com/2020/03/14/spain-declares-state-of-emergency-due-to-coronavirus.html</a> |
| Venue closure | 2020-03-15 | 17 out of 17 | Navarre             | <a href="https://www.cnbcc.com/2020/03/14/spain-declares-state-of-emergency-due-to-coronavirus.html">https://www.cnbcc.com/2020/03/14/spain-declares-state-of-emergency-due-to-coronavirus.html</a> |
| Venue closure | 2020-03-15 | 17 out of 17 | Region of Murcia    | <a href="https://www.cnbcc.com/2020/03/14/spain-declares-state-of-emergency-due-to-coronavirus.html">https://www.cnbcc.com/2020/03/14/spain-declares-state-of-emergency-due-to-coronavirus.html</a> |

| <b>NPI</b>                                                        | <b>Date</b> | <b># Effective</b> | <b>Region</b>    | <b>Source</b>                                                                                                                                                                                       |
|-------------------------------------------------------------------|-------------|--------------------|------------------|-----------------------------------------------------------------------------------------------------------------------------------------------------------------------------------------------------|
| <i>NPI implemented in two thirds of the regions by 2020-03-15</i> |             |                    |                  |                                                                                                                                                                                                     |
| Lockdown                                                          | 2020-03-15  | 17 out of 17       | Andalusia        | <a href="https://www.cnbcc.com/2020/03/14/spain-declares-state-of-emergency-due-to-coronavirus.html">https://www.cnbcc.com/2020/03/14/spain-declares-state-of-emergency-due-to-coronavirus.html</a> |
| Lockdown                                                          | 2020-03-15  | 17 out of 17       | Aragon           | <a href="https://www.cnbcc.com/2020/03/14/spain-declares-state-of-emergency-due-to-coronavirus.html">https://www.cnbcc.com/2020/03/14/spain-declares-state-of-emergency-due-to-coronavirus.html</a> |
| Lockdown                                                          | 2020-03-15  | 17 out of 17       | Asturias         | <a href="https://www.cnbcc.com/2020/03/14/spain-declares-state-of-emergency-due-to-coronavirus.html">https://www.cnbcc.com/2020/03/14/spain-declares-state-of-emergency-due-to-coronavirus.html</a> |
| Lockdown                                                          | 2020-03-15  | 17 out of 17       | Balearic Islands | <a href="https://www.cnbcc.com/2020/03/14/spain-declares-state-of-emergency-due-to-coronavirus.html">https://www.cnbcc.com/2020/03/14/spain-declares-state-of-emergency-due-to-coronavirus.html</a> |
| Lockdown                                                          | 2020-03-15  | 17 out of 17       | Basque Country   | <a href="https://www.cnbcc.com/2020/03/14/spain-declares-state-of-emergency-due-to-coronavirus.html">https://www.cnbcc.com/2020/03/14/spain-declares-state-of-emergency-due-to-coronavirus.html</a> |
| Lockdown                                                          | 2020-03-15  | 17 out of 17       | Canary Islands   | <a href="https://www.cnbcc.com/2020/03/14/spain-declares-state-of-emergency-due-to-coronavirus.html">https://www.cnbcc.com/2020/03/14/spain-declares-state-of-emergency-due-to-coronavirus.html</a> |
| Lockdown                                                          | 2020-03-15  | 17 out of 17       | Cantabria        | <a href="https://www.cnbcc.com/2020/03/14/spain-declares-state-of-emergency-due-to-coronavirus.html">https://www.cnbcc.com/2020/03/14/spain-declares-state-of-emergency-due-to-coronavirus.html</a> |

|          |            |              |                     |                                                                                                                                                                                                   |
|----------|------------|--------------|---------------------|---------------------------------------------------------------------------------------------------------------------------------------------------------------------------------------------------|
| Lockdown | 2020-03-15 | 17 out of 17 | Castille and Leon   | <a href="https://www.cnbc.com/2020/03/14/spain-declares-state-of-emergency-due-to-coronavirus.html">https://www.cnbc.com/2020/03/14/spain-declares-state-of-emergency-due-to-coronavirus.html</a> |
| Lockdown | 2020-03-15 | 17 out of 17 | Castille- La Mancha | <a href="https://www.cnbc.com/2020/03/14/spain-declares-state-of-emergency-due-to-coronavirus.html">https://www.cnbc.com/2020/03/14/spain-declares-state-of-emergency-due-to-coronavirus.html</a> |
| Lockdown | 2020-03-15 | 17 out of 17 | Catalonia           | <a href="https://www.cnbc.com/2020/03/14/spain-declares-state-of-emergency-due-to-coronavirus.html">https://www.cnbc.com/2020/03/14/spain-declares-state-of-emergency-due-to-coronavirus.html</a> |
| Lockdown | 2020-03-15 | 17 out of 17 | Community of Madrid | <a href="https://www.cnbc.com/2020/03/14/spain-declares-state-of-emergency-due-to-coronavirus.html">https://www.cnbc.com/2020/03/14/spain-declares-state-of-emergency-due-to-coronavirus.html</a> |
| Lockdown | 2020-03-15 | 17 out of 17 | Extremadura         | <a href="https://www.cnbc.com/2020/03/14/spain-declares-state-of-emergency-due-to-coronavirus.html">https://www.cnbc.com/2020/03/14/spain-declares-state-of-emergency-due-to-coronavirus.html</a> |
| Lockdown | 2020-03-15 | 17 out of 17 | Galicia             | <a href="https://www.cnbc.com/2020/03/14/spain-declares-state-of-emergency-due-to-coronavirus.html">https://www.cnbc.com/2020/03/14/spain-declares-state-of-emergency-due-to-coronavirus.html</a> |
| Lockdown | 2020-03-15 | 17 out of 17 | La Rioja            | <a href="https://www.cnbc.com/2020/03/14/spain-declares-state-of-emergency-due-to-coronavirus.html">https://www.cnbc.com/2020/03/14/spain-declares-state-of-emergency-due-to-coronavirus.html</a> |
| Lockdown | 2020-03-15 | 17 out of 17 | Navarre             | <a href="https://www.cnbc.com/2020/03/14/spain-declares-state-of-emergency-due-to-coronavirus.html">https://www.cnbc.com/2020/03/14/spain-declares-state-of-emergency-due-to-coronavirus.html</a> |
| Lockdown | 2020-03-15 | 17 out of 17 | Region of Murcia    | <a href="https://www.cnbc.com/2020/03/14/spain-declares-state-of-emergency-due-to-coronavirus.html">https://www.cnbc.com/2020/03/14/spain-declares-state-of-emergency-due-to-coronavirus.html</a> |
| Lockdown | 2020-03-15 | 17 out of 17 | Valencian Community | <a href="https://www.cnbc.com/2020/03/14/spain-declares-state-of-emergency-due-to-coronavirus.html">https://www.cnbc.com/2020/03/14/spain-declares-state-of-emergency-due-to-coronavirus.html</a> |

| <b>NPI</b>                                                        | <b>Date</b> | <b># Effective</b> | <b>Region</b>    | <b>Source</b>                                                                                                                                                                                                                                                                                                           |
|-------------------------------------------------------------------|-------------|--------------------|------------------|-------------------------------------------------------------------------------------------------------------------------------------------------------------------------------------------------------------------------------------------------------------------------------------------------------------------------|
| <i>NPI implemented in two thirds of the regions by 2020-03-30</i> |             |                    |                  |                                                                                                                                                                                                                                                                                                                         |
| Work ban                                                          | 2020-03-30  | 17 out of 17       | Andalusia        | <a href="https://elpais.com/espana/2020-03-28/el-gobierno-amplia-el-confinamiento-los-trabajadores-de-actividades-no-esenciales-deberan-quedarse-en-casa.html">https://elpais.com/espana/2020-03-28/el-gobierno-amplia-el-confinamiento-los-trabajadores-de-actividades-no-esenciales-deberan-quedarse-en-casa.html</a> |
| Work ban                                                          | 2020-03-30  | 17 out of 17       | Aragon           | <a href="https://elpais.com/espana/2020-03-28/el-gobierno-amplia-el-confinamiento-los-trabajadores-de-actividades-no-esenciales-deberan-quedarse-en-casa.html">https://elpais.com/espana/2020-03-28/el-gobierno-amplia-el-confinamiento-los-trabajadores-de-actividades-no-esenciales-deberan-quedarse-en-casa.html</a> |
| Work ban                                                          | 2020-03-30  | 17 out of 17       | Asturias         | <a href="https://elpais.com/espana/2020-03-28/el-gobierno-amplia-el-confinamiento-los-trabajadores-de-actividades-no-esenciales-deberan-quedarse-en-casa.html">https://elpais.com/espana/2020-03-28/el-gobierno-amplia-el-confinamiento-los-trabajadores-de-actividades-no-esenciales-deberan-quedarse-en-casa.html</a> |
| Work ban                                                          | 2020-03-30  | 17 out of 17       | Balearic Islands | <a href="https://elpais.com/espana/2020-03-28/el-gobierno-amplia-el-confinamiento-los-trabajadores-de-actividades-no-esenciales-deberan-quedarse-en-casa.html">https://elpais.com/espana/2020-03-28/el-gobierno-amplia-el-confinamiento-los-trabajadores-de-actividades-no-esenciales-deberan-quedarse-en-casa.html</a> |
| Work ban                                                          | 2020-03-30  | 17 out of 17       | Basque Country   | <a href="https://elpais.com/espana/2020-03-28/el-gobierno-amplia-el-confinamiento-los-trabajadores-de-actividades-no-esenciales-deberan-quedarse-en-casa.html">https://elpais.com/espana/2020-03-28/el-gobierno-amplia-el-confinamiento-los-trabajadores-de-actividades-no-esenciales-deberan-quedarse-en-casa.html</a> |
| Work ban                                                          | 2020-03-30  | 17 out of 17       | Canary Islands   | <a href="https://elpais.com/espana/2020-03-28/el-gobierno-amplia-el-confinamiento-los-trabajadores-de-actividades-no-esenciales-deberan-quedarse-en-casa.html">https://elpais.com/espana/2020-03-28/el-gobierno-amplia-el-confinamiento-los-trabajadores-de-actividades-no-esenciales-deberan-quedarse-en-casa.html</a> |

|          |            |              |                     |                                                                                                                                                                                                                                                                                                                               |
|----------|------------|--------------|---------------------|-------------------------------------------------------------------------------------------------------------------------------------------------------------------------------------------------------------------------------------------------------------------------------------------------------------------------------|
| Work ban | 2020-03-30 | 17 out of 17 | Cantabria           | <a href="https://elpais.com/espana/2020-03-28/el-gobierno-amplia-el-confinamiento-los-trabajadores-de-actividades-no-esenciales-deberan-quequedarse-en-casa.html">https://elpais.com/espana/2020-03-28/el-gobierno-amplia-el-confinamiento-los-trabajadores-de-actividades-no-esenciales-deberan-quequedarse-en-casa.html</a> |
| Work ban | 2020-03-30 | 17 out of 17 | Castille and Leon   | <a href="https://elpais.com/espana/2020-03-28/el-gobierno-amplia-el-confinamiento-los-trabajadores-de-actividades-no-esenciales-deberan-quequedarse-en-casa.html">https://elpais.com/espana/2020-03-28/el-gobierno-amplia-el-confinamiento-los-trabajadores-de-actividades-no-esenciales-deberan-quequedarse-en-casa.html</a> |
| Work ban | 2020-03-30 | 17 out of 17 | Castille- La Mancha | <a href="https://elpais.com/espana/2020-03-28/el-gobierno-amplia-el-confinamiento-los-trabajadores-de-actividades-no-esenciales-deberan-quequedarse-en-casa.html">https://elpais.com/espana/2020-03-28/el-gobierno-amplia-el-confinamiento-los-trabajadores-de-actividades-no-esenciales-deberan-quequedarse-en-casa.html</a> |
| Work ban | 2020-03-30 | 17 out of 17 | Catalonia           | <a href="https://elpais.com/espana/2020-03-28/el-gobierno-amplia-el-confinamiento-los-trabajadores-de-actividades-no-esenciales-deberan-quequedarse-en-casa.html">https://elpais.com/espana/2020-03-28/el-gobierno-amplia-el-confinamiento-los-trabajadores-de-actividades-no-esenciales-deberan-quequedarse-en-casa.html</a> |
| Work ban | 2020-03-30 | 17 out of 17 | Community of Madrid | <a href="https://elpais.com/espana/2020-03-28/el-gobierno-amplia-el-confinamiento-los-trabajadores-de-actividades-no-esenciales-deberan-quequedarse-en-casa.html">https://elpais.com/espana/2020-03-28/el-gobierno-amplia-el-confinamiento-los-trabajadores-de-actividades-no-esenciales-deberan-quequedarse-en-casa.html</a> |
| Work ban | 2020-03-30 | 17 out of 17 | Extremadura         | <a href="https://elpais.com/espana/2020-03-28/el-gobierno-amplia-el-confinamiento-los-trabajadores-de-actividades-no-esenciales-deberan-quequedarse-en-casa.html">https://elpais.com/espana/2020-03-28/el-gobierno-amplia-el-confinamiento-los-trabajadores-de-actividades-no-esenciales-deberan-quequedarse-en-casa.html</a> |
| Work ban | 2020-03-30 | 17 out of 17 | Galicia             | <a href="https://elpais.com/espana/2020-03-28/el-gobierno-amplia-el-confinamiento-los-trabajadores-de-actividades-no-esenciales-deberan-quequedarse-en-casa.html">https://elpais.com/espana/2020-03-28/el-gobierno-amplia-el-confinamiento-los-trabajadores-de-actividades-no-esenciales-deberan-quequedarse-en-casa.html</a> |
| Work ban | 2020-03-30 | 17 out of 17 | La Rioja            | <a href="https://elpais.com/espana/2020-03-28/el-gobierno-amplia-el-confinamiento-los-trabajadores-de-actividades-no-esenciales-deberan-quequedarse-en-casa.html">https://elpais.com/espana/2020-03-28/el-gobierno-amplia-el-confinamiento-los-trabajadores-de-actividades-no-esenciales-deberan-quequedarse-en-casa.html</a> |
| Work ban | 2020-03-30 | 17 out of 17 | Navarre             | <a href="https://elpais.com/espana/2020-03-28/el-gobierno-amplia-el-confinamiento-los-trabajadores-de-actividades-no-esenciales-deberan-quequedarse-en-casa.html">https://elpais.com/espana/2020-03-28/el-gobierno-amplia-el-confinamiento-los-trabajadores-de-actividades-no-esenciales-deberan-quequedarse-en-casa.html</a> |
| Work ban | 2020-03-30 | 17 out of 17 | Region of Murcia    | <a href="https://elpais.com/espana/2020-03-28/el-gobierno-amplia-el-confinamiento-los-trabajadores-de-actividades-no-esenciales-deberan-quequedarse-en-casa.html">https://elpais.com/espana/2020-03-28/el-gobierno-amplia-el-confinamiento-los-trabajadores-de-actividades-no-esenciales-deberan-quequedarse-en-casa.html</a> |
| Work ban | 2020-03-30 | 17 out of 17 | Valencian Community | <a href="https://elpais.com/espana/2020-03-28/el-gobierno-amplia-el-confinamiento-los-trabajadores-de-actividades-no-esenciales-deberan-quequedarse-en-casa.html">https://elpais.com/espana/2020-03-28/el-gobierno-amplia-el-confinamiento-los-trabajadores-de-actividades-no-esenciales-deberan-quequedarse-en-casa.html</a> |

Table 9: Sources for policies implemented across different Spanish regions

| <b>NPI</b>                                                        | <b>Date</b> | <b># Effective</b> | <b>Region</b>                   | <b>Source</b>                                                                                                                                                                                                                                                                                                                                                                                                                                                                                                               |
|-------------------------------------------------------------------|-------------|--------------------|---------------------------------|-----------------------------------------------------------------------------------------------------------------------------------------------------------------------------------------------------------------------------------------------------------------------------------------------------------------------------------------------------------------------------------------------------------------------------------------------------------------------------------------------------------------------------|
| Event ban                                                         | 2020-03-12  | 3 out of 12        | Alberta                         | <a href="https://www.alberta.ca/release.cfm?xID=6980324A5B1B0-BC2C-40A8-A6AD9E30E3189425">https://www.alberta.ca/release.cfm?xID=6980324A5B1B0-BC2C-40A8-A6AD9E30E3189425</a>                                                                                                                                                                                                                                                                                                                                               |
| Event ban                                                         | 2020-03-12  | 3 out of 12        | British Columbia                | <a href="https://news.gov.bc.ca/releases/2020HLTH0077-000484">https://news.gov.bc.ca/releases/2020HLTH0077-000484</a>                                                                                                                                                                                                                                                                                                                                                                                                       |
| Event ban                                                         | 2020-03-12  | 3 out of 12        | New Brunswick                   | <a href="https://www2.gnb.ca/content/gnb/en/news/news_release.2020.03.0114.html">https://www2.gnb.ca/content/gnb/en/news/news_release.2020.03.0114.html</a>                                                                                                                                                                                                                                                                                                                                                                 |
| Event ban                                                         | 2020-03-13  | 6 out of 12        | Manitoba                        | <a href="https://news.gov.mb.ca/news/index.html?item=46933&amp;posted=2020-03-13">https://news.gov.mb.ca/news/index.html?item=46933&amp;posted=2020-03-13</a>                                                                                                                                                                                                                                                                                                                                                               |
| Event ban                                                         | 2020-03-13  | 6 out of 12        | Newfoundland<br>and<br>Labrador | <a href="https://www.gov.nl.ca/releases/2020/tcii/0313n04/">https://www.gov.nl.ca/releases/2020/tcii/0313n04/</a>                                                                                                                                                                                                                                                                                                                                                                                                           |
| Event ban                                                         | 2020-03-13  | 6 out of 12        | Ontario                         | <a href="https://news.ontario.ca/mtc/en/2020/03/statement-from-minister-elliott-and-minister-macleod-on-the-2019-novel-coronavirus-covid-19-1.html">https://news.ontario.ca/mtc/en/2020/03/statement-from-minister-elliott-and-minister-macleod-on-the-2019-novel-coronavirus-covid-19-1.html</a>                                                                                                                                                                                                                           |
| Event ban                                                         | 2020-03-14  | 7 out of 12        | Quebec                          | <a href="http://www.fil-information.gouv.qc.ca/Pages/Article.aspx?lang=en&amp;motsCles=Covid&amp;listeThe=&amp;listeReg=&amp;listeDiff=&amp;type=&amp;dateDebut=2019-09-28&amp;dateFin=2020-03-28&amp;afficherResultats=oui&amp;Page=5&amp;idArticle=2803149905">http://www.fil-information.gouv.qc.ca/Pages/Article.aspx?lang=en&amp;motsCles=Covid&amp;listeThe=&amp;listeReg=&amp;listeDiff=&amp;type=&amp;dateDebut=2019-09-28&amp;dateFin=2020-03-28&amp;afficherResultats=oui&amp;Page=5&amp;idArticle=2803149905</a> |
| <i>NPI implemented in two thirds of the regions by 2020-03-15</i> |             |                    |                                 |                                                                                                                                                                                                                                                                                                                                                                                                                                                                                                                             |
| Event ban                                                         | 2020-03-15  | 8 out of 12        | Nova Scotia                     | <a href="https://novascotia.ca/news/release/?id=20200315002">https://novascotia.ca/news/release/?id=20200315002</a>                                                                                                                                                                                                                                                                                                                                                                                                         |
| Event ban                                                         | 2020-03-16  | 11 out of 12       | Prince Edward Island            | <a href="https://www.princeedwardisland.ca/en/news/premier-announces-initial-financial-support-declares-public-health-emergency">https://www.princeedwardisland.ca/en/news/premier-announces-initial-financial-support-declares-public-health-emergency</a>                                                                                                                                                                                                                                                                 |
| Event ban                                                         | 2020-03-16  | 11 out of 12       | Saskatchewan                    | <a href="https://www.saskatchewan.ca/government/news-and-media/2020/march/13/further-measures-for-covid-19">https://www.saskatchewan.ca/government/news-and-media/2020/march/13/further-measures-for-covid-19</a>                                                                                                                                                                                                                                                                                                           |
| Event ban                                                         | 2020-03-16  | 11 out of 12       | Yukon                           | <a href="https://yukon.ca/en/news/chief-medical-officer-health-recommends-broad-new-measures-yukon">https://yukon.ca/en/news/chief-medical-officer-health-recommends-broad-new-measures-yukon</a>                                                                                                                                                                                                                                                                                                                           |
| Event ban                                                         | 2020-03-22  | 12 out of 12       | Northwest Territories           | <a href="https://www.hss.gov.nt.ca/en/newsroom/all-gatherings-are-advised-cancel-effective-immediately">https://www.hss.gov.nt.ca/en/newsroom/all-gatherings-are-advised-cancel-effective-immediately</a>                                                                                                                                                                                                                                                                                                                   |
| <b>NPI</b>                                                        | <b>Date</b> | <b># Effective</b> | <b>Region</b>                   | <b>Source</b>                                                                                                                                                                                                                                                                                                                                                                                                                                                                                                               |
| Gathering ban                                                     | 2020-03-16  | 1 out of 12        | Prince Edward Island            | <a href="https://www.princeedwardisland.ca/en/news/premier-announces-initial-financial-support-declares-public-health-emergency">https://www.princeedwardisland.ca/en/news/premier-announces-initial-financial-support-declares-public-health-emergency</a>                                                                                                                                                                                                                                                                 |
| Gathering ban                                                     | 2020-03-19  | 2 out of 12        | New Brunswick                   | <a href="https://www2.gnb.ca/content/gnb/en/news/news_release.2020.03.0139.html">https://www2.gnb.ca/content/gnb/en/news/news_release.2020.03.0139.html</a>                                                                                                                                                                                                                                                                                                                                                                 |
| Gathering ban                                                     | 2020-03-20  | 3 out of 12        | Saskatchewan                    | <a href="https://www.saskatchewan.ca/government/news-and-media/2020/march/20/covid-19-update-march-20">https://www.saskatchewan.ca/government/news-and-media/2020/march/20/covid-19-update-march-20</a>                                                                                                                                                                                                                                                                                                                     |
| Gathering ban                                                     | 2020-03-21  | 4 out of 12        | Quebec                          | <a href="http://www.fil-information.gouv.qc.ca/Pages/Article.aspx?lang=en&amp;motsCles=Covid&amp;listeThe=&amp;listeReg=&amp;listeDiff=&amp;type=&amp;dateDebut=2019-09-28&amp;dateFin=2020-03-28&amp;afficherResultats=oui&amp;Page=2&amp;idArticle=2803211636">http://www.fil-information.gouv.qc.ca/Pages/Article.aspx?lang=en&amp;motsCles=Covid&amp;listeThe=&amp;listeReg=&amp;listeDiff=&amp;type=&amp;dateDebut=2019-09-28&amp;dateFin=2020-03-28&amp;afficherResultats=oui&amp;Page=2&amp;idArticle=2803211636</a> |
| Gathering ban                                                     | 2020-03-22  | 6 out of 12        | Nova Scotia                     | <a href="https://dailyhive.com/vancouver/nova-scotia-coronavirus-state-of-emergency">https://dailyhive.com/vancouver/nova-scotia-coronavirus-state-of-emergency</a>                                                                                                                                                                                                                                                                                                                                                         |
| Gathering ban                                                     | 2020-03-22  | 6 out of 12        | Yukon                           | <a href="https://yukon.ca/en/news/yukons-chief-medical-officer-health-provides-update-covid-19-0">https://yukon.ca/en/news/yukons-chief-medical-officer-health-provides-update-covid-19-0</a>                                                                                                                                                                                                                                                                                                                               |



Gathering ban 2020-03-27 7 out of 12 Alberta <https://www.cbc.ca/news/canada/edmonton/alberta-covid-19-coronavirus-deena-hinshaw-1.5512445>

-----  
*NPI implemented in two thirds of the regions by 2020-03-28*

Gathering ban 2020-03-28 8 out of 12 Ontario <https://globalnews.ca/news/6746181/ontario-ban-gatherings/>

Gathering ban 2020-03-31 9 out of 12 Newfoundland and Labrador <https://www.gov.nl.ca/covid-19/faqs/>

Gathering ban 2020-04-01 10 out of 12 Manitoba <https://news.gov.mb.ca/news/index.html?item=47337&posted=2020-03-30>

Gathering ban 2020-04-11 11 out of 12 Northwest Territories <https://www.gov.nt.ca/en/newsroom/two-new-orders-nwt-chief-public-health-officer-strengthen-response-covid-19-pandemic>

| NPI                                                                        | Date       | # Effective  | Region                    | Source                                                                                                                                                                                                                                                                                                                                                                                                                                                                                                                      |
|----------------------------------------------------------------------------|------------|--------------|---------------------------|-----------------------------------------------------------------------------------------------------------------------------------------------------------------------------------------------------------------------------------------------------------------------------------------------------------------------------------------------------------------------------------------------------------------------------------------------------------------------------------------------------------------------------|
| School closure                                                             | 2020-03-13 | 1 out of 12  | New Brunswick             | <a href="https://www2.gnb.ca/content/gnb/en/news/news_release.2020.03.0117.html">https://www2.gnb.ca/content/gnb/en/news/news_release.2020.03.0117.html</a>                                                                                                                                                                                                                                                                                                                                                                 |
| School closure                                                             | 2020-03-14 | 2 out of 12  | Quebec                    | <a href="http://www.fil-information.gouv.qc.ca/Pages/Article.aspx?lang=en&amp;motsCles=Covid&amp;listeThe=&amp;listeReg=&amp;listeDiff=&amp;type=&amp;dateDebut=2019-09-28&amp;dateFin=2020-03-28&amp;afficherResultats=oui&amp;Page=6&amp;idArticle=2803137507">http://www.fil-information.gouv.qc.ca/Pages/Article.aspx?lang=en&amp;motsCles=Covid&amp;listeThe=&amp;listeReg=&amp;listeDiff=&amp;type=&amp;dateDebut=2019-09-28&amp;dateFin=2020-03-28&amp;afficherResultats=oui&amp;Page=6&amp;idArticle=2803137507</a> |
| School closure                                                             | 2020-03-15 | 3 out of 12  | Alberta                   | <a href="https://www.alberta.ca/release.cfm?xID=69818C355F188-C2A3-F5C6-875A2A33929D5C05">https://www.alberta.ca/release.cfm?xID=69818C355F188-C2A3-F5C6-875A2A33929D5C05</a>                                                                                                                                                                                                                                                                                                                                               |
| School closure                                                             | 2020-03-16 | 7 out of 12  | Newfoundland and Labrador | <a href="https://www.gov.nl.ca/releases/2020/eecd/0316n04/">https://www.gov.nl.ca/releases/2020/eecd/0316n04/</a>                                                                                                                                                                                                                                                                                                                                                                                                           |
| School closure                                                             | 2020-03-16 | 7 out of 12  | Northwest Territories     | <a href="https://cabinradio.ca/32133/news/education/nwt-tells-schools-to-close-until-after-easter-daycares-unaffected/">https://cabinradio.ca/32133/news/education/nwt-tells-schools-to-close-until-after-easter-daycares-unaffected/</a>                                                                                                                                                                                                                                                                                   |
| School closure                                                             | 2020-03-16 | 7 out of 12  | Ontario                   | <a href="https://news.ontario.ca/maesd/en/2020/03/statement-from-minister-elliott-and-minister-romano-on-the-2019-novel-coronavirus-covid-19.html">https://news.ontario.ca/maesd/en/2020/03/statement-from-minister-elliott-and-minister-romano-on-the-2019-novel-coronavirus-covid-19.html</a>                                                                                                                                                                                                                             |
| School closure                                                             | 2020-03-16 | 7 out of 12  | Saskatchewan              | <a href="https://www.saskatchewan.ca/government/news-and-media/2020/march/16/class-suspensions">https://www.saskatchewan.ca/government/news-and-media/2020/march/16/class-suspensions</a>                                                                                                                                                                                                                                                                                                                                   |
| -----<br><i>NPI implemented in two thirds of the regions by 2020-03-17</i> |            |              |                           |                                                                                                                                                                                                                                                                                                                                                                                                                                                                                                                             |
| School closure                                                             | 2020-03-17 | 10 out of 12 | British Columbia          | <a href="https://news.gov.bc.ca/releases/2020EMBC0014-000552">https://news.gov.bc.ca/releases/2020EMBC0014-000552</a>                                                                                                                                                                                                                                                                                                                                                                                                       |
| School closure                                                             | 2020-03-17 | 10 out of 12 | Nova Scotia               | <a href="https://novascotia.ca/news/release/?id=20200315002">https://novascotia.ca/news/release/?id=20200315002</a>                                                                                                                                                                                                                                                                                                                                                                                                         |
| School closure                                                             | 2020-03-17 | 10 out of 12 | Prince Edward Island      | <a href="https://www.princeedwardisland.ca/en/news/province-announces-covid-19-related-closures">https://www.princeedwardisland.ca/en/news/province-announces-covid-19-related-closures</a>                                                                                                                                                                                                                                                                                                                                 |
| School closure                                                             | 2020-03-18 | 11 out of 12 | Yukon                     | <a href="https://yukon.ca/en/news/chief-medical-officer-health-declares-public-health-emergency">https://yukon.ca/en/news/chief-medical-officer-health-declares-public-health-emergency</a>                                                                                                                                                                                                                                                                                                                                 |
| School closure                                                             | 2020-03-23 | 12 out of 12 | Manitoba                  | <a href="https://news.gov.mb.ca/news/index.html?item=46936&amp;posted=2020-03-14">https://news.gov.mb.ca/news/index.html?item=46936&amp;posted=2020-03-14</a>                                                                                                                                                                                                                                                                                                                                                               |
| NPI                                                                        | Date       | # Effective  | Region                    | Source                                                                                                                                                                                                                                                                                                                                                                                                                                                                                                                      |

|                                                                            |             |                    |                           |                                                                                                                                                                                                                                                                                                                                                                                                                                                                                                                             |
|----------------------------------------------------------------------------|-------------|--------------------|---------------------------|-----------------------------------------------------------------------------------------------------------------------------------------------------------------------------------------------------------------------------------------------------------------------------------------------------------------------------------------------------------------------------------------------------------------------------------------------------------------------------------------------------------------------------|
| Venue closure                                                              | 2020-03-15  | 1 out of 12        | Quebec                    | <a href="http://www.fil-information.gouv.qc.ca/Pages/Article.aspx?lang=en&amp;motsCles=Covid&amp;listeThe=&amp;listeReg=&amp;listeDiff=&amp;type=&amp;dateDebut=2019-09-28&amp;dateFin=2020-03-28&amp;afficherResultats=oui&amp;Page=5&amp;idArticle=2803159403">http://www.fil-information.gouv.qc.ca/Pages/Article.aspx?lang=en&amp;motsCles=Covid&amp;listeThe=&amp;listeReg=&amp;listeDiff=&amp;type=&amp;dateDebut=2019-09-28&amp;dateFin=2020-03-28&amp;afficherResultats=oui&amp;Page=5&amp;idArticle=2803159403</a> |
| Venue closure                                                              | 2020-03-16  | 2 out of 12        | Ontario                   | <a href="https://news.ontario.ca/mohlhc/en/2020/03/enhanced-measures-to-protect-ontarians-from-covid-19.html">https://news.ontario.ca/mohlhc/en/2020/03/enhanced-measures-to-protect-ontarians-from-covid-19.html</a>                                                                                                                                                                                                                                                                                                       |
| Venue closure                                                              | 2020-03-17  | 6 out of 12        | Alberta                   | <a href="https://www.alberta.ca/release.cfm?xID=69828242A5FFC-D75A-C83E-690D8028C0C4E09F">https://www.alberta.ca/release.cfm?xID=69828242A5FFC-D75A-C83E-690D8028C0C4E09F</a>                                                                                                                                                                                                                                                                                                                                               |
| Venue closure                                                              | 2020-03-17  | 6 out of 12        | British Columbia          | <a href="https://news.gov.bc.ca/releases/2020EMBC0014-000552">https://news.gov.bc.ca/releases/2020EMBC0014-000552</a>                                                                                                                                                                                                                                                                                                                                                                                                       |
| Venue closure                                                              | 2020-03-17  | 6 out of 12        | New Brunswick             | <a href="https://www2.gnb.ca/content/gnb/en/news/news_release.2020.03.0127.html">https://www2.gnb.ca/content/gnb/en/news/news_release.2020.03.0127.html</a>                                                                                                                                                                                                                                                                                                                                                                 |
| Venue closure                                                              | 2020-03-17  | 6 out of 12        | Prince Edward Island      | <a href="https://www.princeedwardisland.ca/en/news/chief-public-health-officer-urges-islanders-work-together-reduce-spread-covid-19">https://www.princeedwardisland.ca/en/news/chief-public-health-officer-urges-islanders-work-together-reduce-spread-covid-19</a>                                                                                                                                                                                                                                                         |
| Venue closure                                                              | 2020-03-19  | 7 out of 12        | Nova Scotia               | <a href="https://novascotia.ca/news/release/?id=20200317005">https://novascotia.ca/news/release/?id=20200317005</a>                                                                                                                                                                                                                                                                                                                                                                                                         |
| <i>NPI implemented in two thirds of the regions by 2020-03-20</i>          |             |                    |                           |                                                                                                                                                                                                                                                                                                                                                                                                                                                                                                                             |
| Venue closure                                                              | 2020-03-20  | 8 out of 12        | Saskatchewan              | <a href="https://www.saskatchewan.ca/government/news-and-media/2020/march/20/covid-19-update-march-20">https://www.saskatchewan.ca/government/news-and-media/2020/march/20/covid-19-update-march-20</a>                                                                                                                                                                                                                                                                                                                     |
| Venue closure                                                              | 2020-03-22  | 9 out of 12        | Northwest Territories     | <a href="https://www.hss.gov.nt.ca/en/newsroom/all-gatherings-are-advised-cancel-effective-immediately">https://www.hss.gov.nt.ca/en/newsroom/all-gatherings-are-advised-cancel-effective-immediately</a>                                                                                                                                                                                                                                                                                                                   |
| Venue closure                                                              | 2020-03-23  | 10 out of 12       | Newfoundland and Labrador | <a href="https://www.gov.nl.ca/covid-19/">https://www.gov.nl.ca/covid-19/</a>                                                                                                                                                                                                                                                                                                                                                                                                                                               |
| Venue closure                                                              | 2020-03-25  | 11 out of 12       | Yukon                     | <a href="https://yukon.ca/en/news/yukons-chief-medical-officer-health-provides-update-covid-19-0">https://yukon.ca/en/news/yukons-chief-medical-officer-health-provides-update-covid-19-0</a>                                                                                                                                                                                                                                                                                                                               |
| Venue closure                                                              | 2020-04-01  | 12 out of 12       | Manitoba                  | <a href="https://news.gov.mb.ca/news/index.html?item=47337&amp;posted=2020-03-30">https://news.gov.mb.ca/news/index.html?item=47337&amp;posted=2020-03-30</a>                                                                                                                                                                                                                                                                                                                                                               |
| <b>NPI</b>                                                                 | <b>Date</b> | <b># Effective</b> | <b>Region</b>             | <b>Source</b>                                                                                                                                                                                                                                                                                                                                                                                                                                                                                                               |
| Lockdown                                                                   | 2020-03-29  | 1 out of 12        | New Brunswick             | <a href="https://www2.gnb.ca/content/gnb/en/news/news_release.2020.03.0164.html">https://www2.gnb.ca/content/gnb/en/news/news_release.2020.03.0164.html</a>                                                                                                                                                                                                                                                                                                                                                                 |
| Lockdown                                                                   | 2020-03-30  | 2 out of 12        | Ontario                   | <a href="https://news.ontario.ca/mohlhc/en/2020/03/statement-from-the-chief-medical-officer-of-health.html">https://news.ontario.ca/mohlhc/en/2020/03/statement-from-the-chief-medical-officer-of-health.html</a>                                                                                                                                                                                                                                                                                                           |
| <i>Two-thirds quota not reached; NPI not implemented on national level</i> |             |                    |                           |                                                                                                                                                                                                                                                                                                                                                                                                                                                                                                                             |
| <b>NPI</b>                                                                 | <b>Date</b> | <b># Effective</b> | <b>Region</b>             | <b>Source</b>                                                                                                                                                                                                                                                                                                                                                                                                                                                                                                               |
| Work ban                                                                   | 2020-03-24  | 1 out of 12        | Ontario                   | <a href="https://news.ontario.ca/opo/en/2020/03/ontario-closing-at-risk-workplaces-to-protect-health-and-safety.html">https://news.ontario.ca/opo/en/2020/03/ontario-closing-at-risk-workplaces-to-protect-health-and-safety.html</a>                                                                                                                                                                                                                                                                                       |
| Work ban                                                                   | 2020-03-27  | 2 out of 12        | Prince Edward Island      | <a href="https://www.princeedwardisland.ca/en/news/prince-edward-island-extends-closures-for-schools-daycares-non-essential-services">https://www.princeedwardisland.ca/en/news/prince-edward-island-extends-closures-for-schools-daycares-non-essential-services</a>                                                                                                                                                                                                                                                       |
| Work ban                                                                   | 2020-04-01  | 3 out of 12        | Manitoba                  | <a href="https://news.gov.mb.ca/news/index.html?item=47337&amp;posted=2020-03-30">https://news.gov.mb.ca/news/index.html?item=47337&amp;posted=2020-03-30</a>                                                                                                                                                                                                                                                                                                                                                               |
| <i>Two-thirds quota not reached; NPI not implemented on national level</i> |             |                    |                           |                                                                                                                                                                                                                                                                                                                                                                                                                                                                                                                             |

Table 10: Sources for policies implemented across different Canadian regions

| <b>NPI</b>                                                        | <b>Date</b> | <b># Effective</b> | <b>Region</b>        | <b>Source</b>                                                                                                                                                                                                                                                                                                                                                                                                                 |
|-------------------------------------------------------------------|-------------|--------------------|----------------------|-------------------------------------------------------------------------------------------------------------------------------------------------------------------------------------------------------------------------------------------------------------------------------------------------------------------------------------------------------------------------------------------------------------------------------|
| <i>NPI implemented in two thirds of the regions by 2020-03-16</i> |             |                    |                      |                                                                                                                                                                                                                                                                                                                                                                                                                               |
| Event ban                                                         | 2020-03-16  | 8 out of 8         | Western Australia    | <a href="https://www.watoday.com.au/politics/federal/effective-ban-on-non-essential-mass-gatherings-of-500-people-20200313-p549u5.html">https://www.watoday.com.au/politics/federal/effective-ban-on-non-essential-mass-gatherings-of-500-people-20200313-p549u5.html</a>                                                                                                                                                     |
| Event ban                                                         | 2020-03-16  | 8 out of 8         | Northern Territory   | <a href="https://www.watoday.com.au/politics/federal/effective-ban-on-non-essential-mass-gatherings-of-500-people-20200313-p549u5.html">https://www.watoday.com.au/politics/federal/effective-ban-on-non-essential-mass-gatherings-of-500-people-20200313-p549u5.html</a>                                                                                                                                                     |
| Event ban                                                         | 2020-03-16  | 8 out of 8         | South Australia      | <a href="https://www.watoday.com.au/politics/federal/effective-ban-on-non-essential-mass-gatherings-of-500-people-20200313-p549u5.html">https://www.watoday.com.au/politics/federal/effective-ban-on-non-essential-mass-gatherings-of-500-people-20200313-p549u5.html</a>                                                                                                                                                     |
| Event ban                                                         | 2020-03-16  | 8 out of 8         | Queensland           | <a href="https://www.watoday.com.au/politics/federal/effective-ban-on-non-essential-mass-gatherings-of-500-people-20200313-p549u5.html">https://www.watoday.com.au/politics/federal/effective-ban-on-non-essential-mass-gatherings-of-500-people-20200313-p549u5.html</a>                                                                                                                                                     |
| Event ban                                                         | 2020-03-16  | 8 out of 8         | New South Wales      | <a href="https://www.watoday.com.au/politics/federal/effective-ban-on-non-essential-mass-gatherings-of-500-people-20200313-p549u5.html">https://www.watoday.com.au/politics/federal/effective-ban-on-non-essential-mass-gatherings-of-500-people-20200313-p549u5.html</a>                                                                                                                                                     |
| Event ban                                                         | 2020-03-16  | 8 out of 8         | Victoria             | <a href="https://www.watoday.com.au/politics/federal/effective-ban-on-non-essential-mass-gatherings-of-500-people-20200313-p549u5.html">https://www.watoday.com.au/politics/federal/effective-ban-on-non-essential-mass-gatherings-of-500-people-20200313-p549u5.html</a>                                                                                                                                                     |
| Event ban                                                         | 2020-03-16  | 8 out of 8         | Tasmania             | <a href="https://www.watoday.com.au/politics/federal/effective-ban-on-non-essential-mass-gatherings-of-500-people-20200313-p549u5.html">https://www.watoday.com.au/politics/federal/effective-ban-on-non-essential-mass-gatherings-of-500-people-20200313-p549u5.html</a>                                                                                                                                                     |
| Event ban                                                         | 2020-03-16  | 8 out of 8         | Australian Territory | Capital <a href="https://www.watoday.com.au/politics/federal/effective-ban-on-non-essential-mass-gatherings-of-500-people-20200313-p549u5.html">https://www.watoday.com.au/politics/federal/effective-ban-on-non-essential-mass-gatherings-of-500-people-20200313-p549u5.html</a>                                                                                                                                             |
| <b>NPI</b>                                                        | <b>Date</b> | <b># Effective</b> | <b>Region</b>        | <b>Source</b>                                                                                                                                                                                                                                                                                                                                                                                                                 |
| Gathering ban                                                     | 2020-03-23  | 1 out of 8         | Northern Territory   | <a href="https://coronavirus.nt.gov.au/updates">https://coronavirus.nt.gov.au/updates</a>                                                                                                                                                                                                                                                                                                                                     |
| Gathering ban                                                     | 2020-03-28  | 2 out of 8         | South Australia      | <a href="https://www.sa.gov.au/_data/assets/pdf_file/0003/605055/Emergency-Management-GatheringsCOVID-19-Direction-2020_FINAL.pdf">https://www.sa.gov.au/_data/assets/pdf_file/0003/605055/Emergency-Management-GatheringsCOVID-19-Direction-2020_FINAL.pdf</a>                                                                                                                                                               |
| <i>NPI implemented in two thirds of the regions by 2020-03-29</i> |             |                    |                      |                                                                                                                                                                                                                                                                                                                                                                                                                               |
| Gathering ban                                                     | 2020-03-29  | 7 out of 8         | Queensland           | <a href="https://www.health.gov.au/news/health-alerts/novel-coronavirus-2019-ncov-health-alert/how-to-protect-yourself-and-others-from-coronavirus-covid-19/limits-on-public-gatherings-for-coronavirus-covid-19">https://www.health.gov.au/news/health-alerts/novel-coronavirus-2019-ncov-health-alert/how-to-protect-yourself-and-others-from-coronavirus-covid-19/limits-on-public-gatherings-for-coronavirus-covid-19</a> |
| Gathering ban                                                     | 2020-03-29  | 7 out of 8         | New South Wales      | <a href="https://www.health.gov.au/news/health-alerts/novel-coronavirus-2019-ncov-health-alert/how-to-protect-yourself-and-others-from-coronavirus-covid-19/limits-on-public-gatherings-for-coronavirus-covid-19">https://www.health.gov.au/news/health-alerts/novel-coronavirus-2019-ncov-health-alert/how-to-protect-yourself-and-others-from-coronavirus-covid-19/limits-on-public-gatherings-for-coronavirus-covid-19</a> |
| Gathering ban                                                     | 2020-03-29  | 7 out of 8         | Victoria             | <a href="https://www.health.gov.au/news/health-alerts/novel-coronavirus-2019-ncov-health-alert/how-to-protect-yourself-and-others-from-coronavirus-covid-19/limits-on-public-gatherings-for-coronavirus-covid-19">https://www.health.gov.au/news/health-alerts/novel-coronavirus-2019-ncov-health-alert/how-to-protect-yourself-and-others-from-coronavirus-covid-19/limits-on-public-gatherings-for-coronavirus-covid-19</a> |

|               |            |            |                      |         |                                                                                                                                                                                                                                                                                                                                                                                                                               |
|---------------|------------|------------|----------------------|---------|-------------------------------------------------------------------------------------------------------------------------------------------------------------------------------------------------------------------------------------------------------------------------------------------------------------------------------------------------------------------------------------------------------------------------------|
| Gathering ban | 2020-03-29 | 7 out of 8 | Tasmania             |         | <a href="https://www.health.gov.au/news/health-alerts/novel-coronavirus-2019-ncov-health-alert/how-to-protect-yourself-and-others-from-coronavirus-covid-19/limits-on-public-gatherings-for-coronavirus-covid-19">https://www.health.gov.au/news/health-alerts/novel-coronavirus-2019-ncov-health-alert/how-to-protect-yourself-and-others-from-coronavirus-covid-19/limits-on-public-gatherings-for-coronavirus-covid-19</a> |
| Gathering ban | 2020-03-29 | 7 out of 8 | Australian Territory | Capital | <a href="https://www.health.gov.au/news/health-alerts/novel-coronavirus-2019-ncov-health-alert/how-to-protect-yourself-and-others-from-coronavirus-covid-19/limits-on-public-gatherings-for-coronavirus-covid-19">https://www.health.gov.au/news/health-alerts/novel-coronavirus-2019-ncov-health-alert/how-to-protect-yourself-and-others-from-coronavirus-covid-19/limits-on-public-gatherings-for-coronavirus-covid-19</a> |
| Gathering ban | 2020-04-01 | 8 out of 8 | Western Australia    |         | <a href="https://ww2.health.wa.gov.au/~media/Files/Corporate/general%20documents/Infectious%20diseases/PDF/Coronavirus/COVID19-Agency-Advisory-14-2020.pdf">https://ww2.health.wa.gov.au/~media/Files/Corporate/general%20documents/Infectious%20diseases/PDF/Coronavirus/COVID19-Agency-Advisory-14-2020.pdf</a>                                                                                                             |

| NPI            | Date       | # Effective | Region               |         | Source                                                                                                                                                                                                                                                                |
|----------------|------------|-------------|----------------------|---------|-----------------------------------------------------------------------------------------------------------------------------------------------------------------------------------------------------------------------------------------------------------------------|
| School closure | 2020-03-16 | 1 out of 8  | New South Wales      |         | <a href="https://www.abc.net.au/news/2020-03-23/coronavirus-parents-told-to-keep-children-home-from-school/12079524">https://www.abc.net.au/news/2020-03-23/coronavirus-parents-told-to-keep-children-home-from-school/12079524</a>                                   |
| School closure | 2020-03-23 | 3 out of 8  | Victoria             |         | <a href="https://www.theguardian.com/world/2020/mar/22/victoria-nsw-lockdowns-scott-morrison-coronavirus-national-cabinet">https://www.theguardian.com/world/2020/mar/22/victoria-nsw-lockdowns-scott-morrison-coronavirus-national-cabinet</a>                       |
| School closure | 2020-03-23 | 3 out of 8  | Australian Territory | Capital | <a href="https://www.theguardian.com/world/2020/mar/22/victoria-nsw-lockdowns-scott-morrison-coronavirus-national-cabinet">https://www.theguardian.com/world/2020/mar/22/victoria-nsw-lockdowns-scott-morrison-coronavirus-national-cabinet</a>                       |
| School closure | 2020-04-20 | 4 out of 8  | Queensland           |         | <a href="https://www.theguardian.com/australia-news/2020/apr/13/are-schools-open-closed-term-2-australia-coronavirus-easter-holidays">https://www.theguardian.com/australia-news/2020/apr/13/are-schools-open-closed-term-2-australia-coronavirus-easter-holidays</a> |

-----  
*Two-thirds quota not reached; NPI not implemented on national level*  
 -----

| NPI           | Date       | # Effective | Region             |  | Source                                                                                                                                                                                                                                                                                                                                  |
|---------------|------------|-------------|--------------------|--|-----------------------------------------------------------------------------------------------------------------------------------------------------------------------------------------------------------------------------------------------------------------------------------------------------------------------------------------|
| Venue closure | 2020-03-23 | 8 out of 8  | Western Australia  |  | <a href="https://www.theguardian.com/world/live/2020/mar/22/coronavirus-updates-live-australia-nsw-victoria-qlt-tasmania-cases-government-stimulus-latest-update-news">https://www.theguardian.com/world/live/2020/mar/22/coronavirus-updates-live-australia-nsw-victoria-qlt-tasmania-cases-government-stimulus-latest-update-news</a> |
| Venue closure | 2020-03-23 | 8 out of 8  | Northern Territory |  | <a href="https://www.theguardian.com/world/live/2020/mar/22/coronavirus-updates-live-australia-nsw-victoria-qlt-tasmania-cases-government-stimulus-latest-update-news">https://www.theguardian.com/world/live/2020/mar/22/coronavirus-updates-live-australia-nsw-victoria-qlt-tasmania-cases-government-stimulus-latest-update-news</a> |
| Venue closure | 2020-03-23 | 8 out of 8  | South Australia    |  | <a href="https://www.theguardian.com/world/live/2020/mar/22/coronavirus-updates-live-australia-nsw-victoria-qlt-tasmania-cases-government-stimulus-latest-update-news">https://www.theguardian.com/world/live/2020/mar/22/coronavirus-updates-live-australia-nsw-victoria-qlt-tasmania-cases-government-stimulus-latest-update-news</a> |
| Venue closure | 2020-03-23 | 8 out of 8  | Queensland         |  | <a href="https://www.theguardian.com/world/live/2020/mar/22/coronavirus-updates-live-australia-nsw-victoria-qlt-tasmania-cases-government-stimulus-latest-update-news">https://www.theguardian.com/world/live/2020/mar/22/coronavirus-updates-live-australia-nsw-victoria-qlt-tasmania-cases-government-stimulus-latest-update-news</a> |

-----  
*NPI implemented in two thirds of the regions by 2020-03-23*  
 -----

| Venue closure                                                              | 2020-03-23                          | 8 out of 8         | New South Wales      |         | <a href="https://www.theguardian.com/world/live/2020/mar/22/coronavirus-updates-live-australia-nsw-victoria-qlt-tasmania-cases-government-stimulus-latest-update-news">https://www.theguardian.com/world/live/2020/mar/22/coronavirus-updates-live-australia-nsw-victoria-qlt-tasmania-cases-government-stimulus-latest-update-news</a>                                     |
|----------------------------------------------------------------------------|-------------------------------------|--------------------|----------------------|---------|-----------------------------------------------------------------------------------------------------------------------------------------------------------------------------------------------------------------------------------------------------------------------------------------------------------------------------------------------------------------------------|
| Venue closure                                                              | 2020-03-23                          | 8 out of 8         | Victoria             |         | <a href="https://www.theguardian.com/world/live/2020/mar/22/coronavirus-updates-live-australia-nsw-victoria-qlt-tasmania-cases-government-stimulus-latest-update-news">https://www.theguardian.com/world/live/2020/mar/22/coronavirus-updates-live-australia-nsw-victoria-qlt-tasmania-cases-government-stimulus-latest-update-news</a>                                     |
| Venue closure                                                              | 2020-03-23                          | 8 out of 8         | Tasmania             |         | <a href="https://www.theguardian.com/world/live/2020/mar/22/coronavirus-updates-live-australia-nsw-victoria-qlt-tasmania-cases-government-stimulus-latest-update-news">https://www.theguardian.com/world/live/2020/mar/22/coronavirus-updates-live-australia-nsw-victoria-qlt-tasmania-cases-government-stimulus-latest-update-news</a>                                     |
| Venue closure                                                              | 2020-03-23                          | 8 out of 8         | Australian Territory | Capital | <a href="https://www.theguardian.com/world/live/2020/mar/22/coronavirus-updates-live-australia-nsw-victoria-qlt-tasmania-cases-government-stimulus-latest-update-news">https://www.theguardian.com/world/live/2020/mar/22/coronavirus-updates-live-australia-nsw-victoria-qlt-tasmania-cases-government-stimulus-latest-update-news</a>                                     |
| <b>NPI</b>                                                                 | <b>Date</b>                         | <b># Effective</b> | <b>Region</b>        |         | <b>Source</b>                                                                                                                                                                                                                                                                                                                                                               |
| Lockdown                                                                   | 2020-03-29                          | 1 out of 8         | Australian Territory | Capital | <a href="https://www.covid19.act.gov.au/news-articles/latest-federal-government-announcement">https://www.covid19.act.gov.au/news-articles/latest-federal-government-announcement</a>                                                                                                                                                                                       |
| Lockdown                                                                   | 2020-03-31                          | 4 out of 8         | New South Wales      |         | <a href="https://www.legislation.nsw.gov.au/_emergency/Public%20Health%20(COVID-19%20Restrictions%20on%20Gathering%20and%20Movement)%20Order%202020.pdf">https://www.legislation.nsw.gov.au/_emergency/Public%20Health%20(COVID-19%20Restrictions%20on%20Gathering%20and%20Movement)%20Order%202020.pdf</a>                                                                 |
| Lockdown                                                                   | 2020-03-31                          | 4 out of 8         | Victoria             |         | <a href="https://www.vic.gov.au/coronavirusresponse">https://www.vic.gov.au/coronavirusresponse</a>                                                                                                                                                                                                                                                                         |
| Lockdown                                                                   | 2020-03-31                          | 4 out of 8         | Tasmania             |         | <a href="http://www.premier.tas.gov.au/releases/keeping_tasmanians_safe_and_secure_stay_home,_save_lives">http://www.premier.tas.gov.au/releases/keeping_tasmanians_safe_and_secure_stay_home,_save_lives</a>                                                                                                                                                               |
| Lockdown                                                                   | 2020-04-02                          | 5 out of 8         | Queensland           |         | <a href="https://www.health.qld.gov.au/system-governance/legislation/cho-public-health-directions-under-expanded-public-health-act-powers/home-confinement-movement-gathering-direction">https://www.health.qld.gov.au/system-governance/legislation/cho-public-health-directions-under-expanded-public-health-act-powers/home-confinement-movement-gathering-direction</a> |
| <i>Two-thirds quota not reached; NPI not implemented on national level</i> |                                     |                    |                      |         |                                                                                                                                                                                                                                                                                                                                                                             |
| <b>NPI</b>                                                                 | <b>Date</b>                         | <b># Effective</b> | <b>Region</b>        |         | <b>Source</b>                                                                                                                                                                                                                                                                                                                                                               |
| Work ban                                                                   | <i>NPI implemented in no region</i> |                    |                      |         |                                                                                                                                                                                                                                                                                                                                                                             |

Table 11: Sources for policies implemented across different Australian regions

| <b>NPI</b>                                                        | <b>Date</b> | <b># Effective</b> | <b>Region</b> | <b>Source</b>                                                                                                                                                                                                                                       |
|-------------------------------------------------------------------|-------------|--------------------|---------------|-----------------------------------------------------------------------------------------------------------------------------------------------------------------------------------------------------------------------------------------------------|
| Event ban                                                         | 2020-03-01  | 1 out of 2         | North         | <a href="https://www.gazzettaufficiale.it/showNewsDetail?id=2490&amp;backTo=archivio&amp;anno=2020&amp;provenienza=archivio">https://www.gazzettaufficiale.it/showNewsDetail?id=2490&amp;backTo=archivio&amp;anno=2020&amp;provenienza=archivio</a> |
| <i>NPI implemented in two thirds of the regions by 2020-03-08</i> |             |                    |               |                                                                                                                                                                                                                                                     |
| Event ban                                                         | 2020-03-08  | 2 out of 2         | South         | <a href="https://www.gazzettaufficiale.it/showNewsDetail?id=2513&amp;backTo=archivio&amp;anno=2020&amp;provenienza=archivio">https://www.gazzettaufficiale.it/showNewsDetail?id=2513&amp;backTo=archivio&amp;anno=2020&amp;provenienza=archivio</a> |
| <b>NPI</b>                                                        | <b>Date</b> | <b># Effective</b> | <b>Region</b> | <b>Source</b>                                                                                                                                                                                                                                       |
| Gathering ban                                                     | 2020-03-01  | 1 out of 2         | North         | <a href="https://www.gazzettaufficiale.it/showNewsDetail?id=2490&amp;backTo=archivio&amp;anno=2020&amp;provenienza=archivio">https://www.gazzettaufficiale.it/showNewsDetail?id=2490&amp;backTo=archivio&amp;anno=2020&amp;provenienza=archivio</a> |
| <i>NPI implemented in two thirds of the regions by 2020-03-08</i> |             |                    |               |                                                                                                                                                                                                                                                     |
| Gathering ban                                                     | 2020-03-08  | 2 out of 2         | South         | <a href="https://www.gazzettaufficiale.it/showNewsDetail?id=2513&amp;backTo=archivio&amp;anno=2020&amp;provenienza=archivio">https://www.gazzettaufficiale.it/showNewsDetail?id=2513&amp;backTo=archivio&amp;anno=2020&amp;provenienza=archivio</a> |
| <b>NPI</b>                                                        | <b>Date</b> | <b># Effective</b> | <b>Region</b> | <b>Source</b>                                                                                                                                                                                                                                       |
| School closure                                                    | 2020-03-01  | 1 out of 2         | North         | <a href="https://www.gazzettaufficiale.it/showNewsDetail?id=2490&amp;backTo=archivio&amp;anno=2020&amp;provenienza=archivio">https://www.gazzettaufficiale.it/showNewsDetail?id=2490&amp;backTo=archivio&amp;anno=2020&amp;provenienza=archivio</a> |
| <i>NPI implemented in two thirds of the regions by 2020-03-08</i> |             |                    |               |                                                                                                                                                                                                                                                     |
| School closure                                                    | 2020-03-08  | 2 out of 2         | South         | <a href="https://www.gazzettaufficiale.it/showNewsDetail?id=2513&amp;backTo=archivio&amp;anno=2020&amp;provenienza=archivio">https://www.gazzettaufficiale.it/showNewsDetail?id=2513&amp;backTo=archivio&amp;anno=2020&amp;provenienza=archivio</a> |
| <b>NPI</b>                                                        | <b>Date</b> | <b># Effective</b> | <b>Region</b> | <b>Source</b>                                                                                                                                                                                                                                       |
| <i>NPI implemented in two thirds of the regions by 2020-03-11</i> |             |                    |               |                                                                                                                                                                                                                                                     |
| Venue closure                                                     | 2020-03-11  | 2 out of 2         | North         | <a href="https://www.gazzettaufficiale.it/showNewsDetail?id=2532&amp;backTo=archivio&amp;anno=2020&amp;provenienza=archivio">https://www.gazzettaufficiale.it/showNewsDetail?id=2532&amp;backTo=archivio&amp;anno=2020&amp;provenienza=archivio</a> |
| Venue closure                                                     | 2020-03-11  | 2 out of 2         | South         | <a href="https://www.gazzettaufficiale.it/showNewsDetail?id=2532&amp;backTo=archivio&amp;anno=2020&amp;provenienza=archivio">https://www.gazzettaufficiale.it/showNewsDetail?id=2532&amp;backTo=archivio&amp;anno=2020&amp;provenienza=archivio</a> |
| <b>NPI</b>                                                        | <b>Date</b> | <b># Effective</b> | <b>Region</b> | <b>Source</b>                                                                                                                                                                                                                                       |
| <i>NPI implemented in two thirds of the regions by 2020-03-11</i> |             |                    |               |                                                                                                                                                                                                                                                     |
| Lockdown                                                          | 2020-03-11  | 2 out of 2         | North         | <a href="https://www.gazzettaufficiale.it/showNewsDetail?id=2532&amp;backTo=archivio&amp;anno=2020&amp;provenienza=archivio">https://www.gazzettaufficiale.it/showNewsDetail?id=2532&amp;backTo=archivio&amp;anno=2020&amp;provenienza=archivio</a> |
| Lockdown                                                          | 2020-03-11  | 2 out of 2         | South         | <a href="https://www.gazzettaufficiale.it/showNewsDetail?id=2532&amp;backTo=archivio&amp;anno=2020&amp;provenienza=archivio">https://www.gazzettaufficiale.it/showNewsDetail?id=2532&amp;backTo=archivio&amp;anno=2020&amp;provenienza=archivio</a> |

| <b>NPI</b>                                                        | <b>Date</b> | <b># Effective</b> | <b>Region</b> | <b>Source</b>                                                                                                                                                                                                                                       |
|-------------------------------------------------------------------|-------------|--------------------|---------------|-----------------------------------------------------------------------------------------------------------------------------------------------------------------------------------------------------------------------------------------------------|
| <i>NPI implemented in two thirds of the regions by 2020-03-22</i> |             |                    |               |                                                                                                                                                                                                                                                     |
| Work ban                                                          | 2020-03-22  | 2 out of 2         | North         | <a href="https://www.gazzettaufficiale.it/showNewsDetail?id=2545&amp;backTo=archivio&amp;anno=2020&amp;provenienza=archivio">https://www.gazzettaufficiale.it/showNewsDetail?id=2545&amp;backTo=archivio&amp;anno=2020&amp;provenienza=archivio</a> |
| Work ban                                                          | 2020-03-22  | 2 out of 2         | South         | <a href="https://www.gazzettaufficiale.it/showNewsDetail?id=2545&amp;backTo=archivio&amp;anno=2020&amp;provenienza=archivio">https://www.gazzettaufficiale.it/showNewsDetail?id=2545&amp;backTo=archivio&amp;anno=2020&amp;provenienza=archivio</a> |

Table 12: Sources for policies implemented across different Italian regions



## References

- [1] Carpenter, B. *et al.* Stan: a probabilistic programming language. *Journal of Statistical Software* (2017).
- [2] Stan Development Team. Prior Choice Recommendations (2020). URL <https://github.com/stan-dev/stan/wiki/Prior-Choice-Recommendations>.
- [3] Stan Development Team. Stan modeling language users guide (Version 2.21) (2019). URL [https://mc-stan.org/docs/2\\_21/reference-manual/effective-sample-size-section.html](https://mc-stan.org/docs/2_21/reference-manual/effective-sample-size-section.html).
- [4] Gelman, A., Rubin, D. B. & others. Inference from iterative simulation using multiple sequences. *Statistical science* **7**, 457–472 (1992).
- [5] Gelman, A. *et al.* *Bayesian Data Analysis* (Chapman & Hall, 2013).
- [6] Vehtari, A., Gelman, A. & Gabry, J. Practical Bayesian model evaluation using leave-one-out cross-validation and WAIC. *Statistics and Computing* **27**, 1413–1432 (2017).
- [7] Flaxman, S., Mishra, S., Gandy, A. & others. Estimating the number of infections and the impact of nonpharmaceutical interventions on COVID-19 in 11 European countries. *Imperial College COVID-19 Response Team* (2020).
